# Supplementary material for: Iron(iv) alkyl complexes: electronic structure contributions to Fe–C bond homolysis and migration reactions that form N–C bonds from N2
Source: PubMed Central journal article supplement (PMC10915813; doi:10.1039/d3sc05939a), 2024-01-24
Supplement: SC-015-D3SC05939A-s001.pdf [file SC-015-D3SC05939A-s001.pdf]

## Supporting Information

### **Iron(IV) alkyl complexes: electronic structure contributions to Fe–C bond homolysis and migration reactions that form N–C bonds from N<sub>2</sub>**

*Samuel M. Bhutto, Reagan X. Hooper, Sean F. McWilliams, Brandon Q. Mercado,  
Patrick L. Holland\**

*Department of Chemistry, Yale University, New Haven, Connecticut 06520*

\* email: [patrick.holland@yale.edu](mailto:patrick.holland@yale.edu)

## Materials and Methods

**General considerations.** All manipulations were performed under an N<sub>2</sub> (or Ar where specified) atmosphere by Schlenk techniques or in an M. Braun or Vigor glovebox maintained at or below 1 ppm of O<sub>2</sub> and H<sub>2</sub>O. Glassware was oven-dried at 160 °C for at least 12 h before use. Graphite, Celite, and molecular sieves were dried at 200 °C under vacuum for at least 12 h. Pentane, hexanes, diethyl ether, THF, and toluene were purified by passage through activated alumina and Q5 columns from Glass Contour Co., under Ar. Hexamethyldisiloxane (HMDSO) was degassed by sparging with N<sub>2</sub> for 3 hours. All solvents were stored over 4 Å molecular sieves. Benzene-*d*<sub>6</sub> was dried over activated alumina and stored over 4 Å molecular sieves. THF-*d*<sub>8</sub> and toluene-*d*<sub>8</sub> were vacuum transferred from sodium benzophenone ketyl solutions and stored over 4 Å molecular sieves. Compounds [LFeBr]<sub>2</sub>,<sup>1</sup> **1**,<sup>2</sup> **4a**,<sup>3</sup> **4b**,<sup>3</sup> **5c**,<sup>4</sup> **9**,<sup>5</sup> and K(18-crown-6)(C<sub>10</sub>H<sub>8</sub>)<sup>6</sup> were prepared as previously reported. Potassium was obtained from Sigma-Aldrich (98%). Potassium on graphite (KC<sub>8</sub>) was prepared by heating stoichiometric amounts of potassium and graphite at 140 °C under an argon atmosphere. 1,2-Bis(chlorodimethylsilyl)ethane (96%), silver trifluoromethanesulfonate (AgOTf) (≥99%), TEMPO (98%), and methylhydrazine (98%) were obtained from Sigma-Aldrich. Methylhydrazine was dried over barium oxide and vacuum distilled prior to use. 18-Crown-6 was obtained from ACROS Organics. 18-Crown-6 was dried by washing with acetonitrile prior to use. <sup>1</sup>H NMR data were recorded on a Bruker Avance 400 or 500 spectrometer (400 or 500 MHz) at room temperature unless otherwise noted. Chemical shifts in <sup>1</sup>H NMR spectra are referenced to external SiMe<sub>4</sub> using the residual protiated solvent peaks in C<sub>6</sub>D<sub>5</sub>H (δ 7.16 ppm) and THF-*d*<sub>7</sub> (δ 3.58 ppm). Resonances were singlets unless otherwise noted. Line fitting of some resonances in the <sup>1</sup>H NMR spectra was performed using MestReNova 10.0.1.

Elemental analyses were obtained from the CENTC Elemental Analysis Facility at the University of Rochester. Microanalysis samples were weighed on a PerkinElmer Model AD-6 Autobalance, analyzed on a PerkinElmer 2400 Series II Analyzer and handled in a VAC Atmospheres glovebox under argon. IR spectra were collected on a Bruker Alpha Platinum IR Spectrometer in ATR mode. UV-vis spectra were recorded on a Cary 50 spectrometer using Schlenk-adapted quartz cuvettes with a 1 mm path length. Continuous-wave X-Band EPR spectra were recorded in perpendicular mode using a Bruker EleXsys EPR Spectrometer equipped with an ER 049X microwave bridge. The spectra were simulated using EasySpin.<sup>7</sup> Solid and solution Mössbauer samples were packed in Delrin sample cups and loaded into the spectrometer at 77 K. Mössbauer measurements were performed using a SEE Co. MS4 Mössbauer spectrometer integrated with a Janis SVT-400T He/N<sub>2</sub> cryostat for measurements at 80 K (unless otherwise noted) with a 0.07 T applied magnetic field. Isomer shifts were determined relative to  $\alpha$ -iron at 298 K. All Mössbauer spectra were fit using the program WMoss (SEE Co.) or MossA,<sup>8</sup> using Lorentzian doublets.

**Preparation of [K(18-crown-6)(THF)<sub>2</sub>][LFeCH<sub>2</sub>SiMe<sub>3</sub>] (5a).** A mixture of **4a** (500 mg, 0.892 mmol) and 18-crown-6 (259 mg, 0.981 mmol) was dissolved in THF (15 mL), and the resulting orange solution was cooled to  $-35$  °C. Solid KC<sub>8</sub> (133 mg, 0.981 mmol) was added to the stirring orange solution leading to a color change to green upon mixing. The reaction warmed to ambient temperature and was stirred for 90 minutes. The mixture was filtered through Celite yielding a green filtrate, and the filter was washed with THF (12 mL). The two filtrates were combined and concentrated under vacuum to 5 mL, layered with hexanes (5 mL), and placed in a  $-35$  °C freezer overnight yielding green crystals of **5a** (787 mg, 82%). <sup>1</sup>H NMR (400 MHz, THF-*d*<sub>8</sub>)  $\delta$  31 (4H), 20 (2H), 3.3 (24H), 2.5 (12H), 0.5 (6H),  $-4$  (9H),  $-31$  (2H),  $-145$  (1H) ppm. Two resonances

corresponding to 4H and 12H were not found and may be broadened too much to be observed.  $\mu_{\text{eff}}$  (Evans, THF- $d_8$ , 298 K) = 4.3(1)  $\mu_{\text{B}}$ . Zero-field Mössbauer (solid, 80 K)  $\delta = 0.44 \text{ mm s}^{-1}$ ,  $|\Delta E_{\text{Q}}| = 1.90 \text{ mm s}^{-1}$ ,  $\Gamma_{\text{L}} = 0.35 \text{ mm s}^{-1}$ ,  $\Gamma_{\text{R}} = 0.41 \text{ mm s}^{-1}$ . IR (ATR, near,  $\text{cm}^{-1}$ ): 3064 (w), 3025 (w), 2967 (m), 2893 (m), 2875 (m), 2840 (w), 2756 (w), 2721 (w), 2698 (w), 1621 (w), 1595 (w), 1545 (w), 1523 (m), 1467 (m), 1438 (s), 1410 (s), 1369 (m), 1356 (m), 1323 (s), 1288 (w), 1253 (m), 1233 (w), 1177 (m), 1110 (s), 1060 (m), 1046 (m), 1025 (m), 964 (s), 937 (m), 863 (m), 840 (m), 793 (m), 760 (m), 736 (m), 715 (w), 699 (w), 674 (w), 664 (w), 627 (w), 602 (w), 575 (w), 495 (m), 442 (m). UV-vis (THF,  $\epsilon$  in  $\text{mM}^{-1}\text{cm}^{-1}$ ): 758 (3.2), 454 (3.9), 422 (4.4), 374 (5.5), 278 (17) nm. Anal. Calcd for  $\text{C}_{53}\text{H}_{92}\text{FeKN}_2\text{O}_8\text{Si}$ : C, 63.13; H, 9.20; N, 2.78. Found: C, 62.65; H, 8.97; N, 2.92.

**Preparation of [K(18-crown-6)(THF) $_2$ ][LFeBn] (**5b**).** A mixture of **4b** (271 mg, 0.480 mmol) and 18-crown-6 (139 mg, 0.528 mmol) was dissolved in THF (8 mL), and the resulting red solution was cooled to  $-35 \text{ }^\circ\text{C}$ . Solid  $\text{KC}_8$  (71 mg, 0.53 mmol) was added to the stirring red solution leading to a color change to green upon mixing. The reaction warmed to ambient temperature and was stirred for 90 minutes. The mixture was filtered through Celite yielding a green filtrate, and the filter was washed with THF (3 mL). The two filtrates were combined and concentrated under vacuum to 4 mL, layered with hexanes (5 mL), and placed in a  $-35 \text{ }^\circ\text{C}$  freezer overnight yielding green crystals of **5b** (376 mg, 77%).  $^1\text{H}$  NMR (400 MHz, THF- $d_8$ )  $\delta$  35 (4H), 19 (2H), 14 (2H), 3.3 (12H), 3.2 (24H),  $-5$  (12H),  $-12$  (2H),  $-19$  (1H),  $-36$  (2H),  $-141$  (1H) ppm. Three resonances corresponding to 2H, 4H, and 6H were not found. These resonances may be broadened or hidden under solvent peaks.  $\mu_{\text{eff}}$  (Evans, THF- $d_8$ , 298 K) = 4.3(1)  $\mu_{\text{B}}$ . Zero-field Mössbauer (solid, 80 K)  $\delta = 0.27 \text{ mm s}^{-1}$ ,  $|\Delta E_{\text{Q}}| = 1.75 \text{ mm s}^{-1}$ ,  $\Gamma_{\text{L}} = 0.38 \text{ mm s}^{-1}$ ,  $\Gamma_{\text{R}} = 0.34 \text{ mm s}^{-1}$ . IR (ATR, neat,  $\text{cm}^{-1}$ ): 3052 (w), 2959 (w), 2901 (m), 2875 (w), 2836 (w), 2807 (w), 1588 (m), 1480 (w), 1461 (w), 1449 (w), 1432 (m), 1385 (m), 1356 (m), 1325 (m), 1305 (w), 1301 (w), 1288 (w), 1256 (m), 1212 (w),



1177 (w), 1110 (s), 1062 (w), 968 (s), 941 (w), 927 (w), 888 (s), 849 (s), 840 (s), 808 (w), 795 (m), 756 (s), 744 (s), 715 (m), 695 (m), 592 (w), 584 (w), 540 (w), 532 (w), 522 (w), 432 (w), 417 (w). UV-vis (THF,  $\epsilon$  in  $\text{mM}^{-1}\text{cm}^{-1}$ ): 692 (3.6), 450 (4.4), 371 (8.0), 413 (5.5), 278 (24) nm. Anal. Calcd for  $\text{C}_{56}\text{H}_{88}\text{FeKN}_2\text{O}_8$ : C, 66.45; H, 8.76; N, 2.77. Found: C, 66.62; H, 8.49; N, 3.19.

**Preparation of (OTf)Me<sub>2</sub>Si(CH<sub>2</sub>)<sub>2</sub>SiMe<sub>2</sub>(OTf) (6).** In the dark, 1,2-bis(chlorodimethylsilyl)ethane (176 mg, 0.818 mmol) was dissolved in toluene (3 mL) and cooled to  $-35\text{ }^\circ\text{C}$ , alongside a solution of AgOTf (630 mg, 2.45 mmol) in toluene (10 mL). The cold silane solution was added dropwise to the stirring cold AgOTf solution, upon which a white precipitate formed immediately. The resulting mixture warmed to ambient temperature and was stirred for 18 h. Volatile materials were removed under vacuum leaving a white solid. The solid was extracted with pentane (30 mL) and filtered through Celite. Volatile materials were removed under vacuum, yielding colorless flakes of **6** (364 mg, 96%). <sup>1</sup>H NMR (400 MHz, C<sub>6</sub>D<sub>6</sub>)  $\delta$  0.46 (s, 4H, CH<sub>2</sub>), 0.00 (s, 12H, CH<sub>3</sub>) (lit:  $\delta$  0.90 and 0.52, CDCl<sub>3</sub>;  $\delta$  0.74 and 0.38, DMSO-*d*<sub>6</sub>) ppm.<sup>9-10</sup> <sup>19</sup>F NMR (376 MHz, C<sub>6</sub>D<sub>6</sub>)  $-\text{77.2}$  (lit:  $\delta$   $-\text{77.0}$ ) ppm.<sup>9</sup>

**Preparation of LFe(CH<sub>2</sub>SiMe<sub>3</sub>)NN(Me<sub>2</sub>Si(CH<sub>2</sub>)<sub>2</sub>SiMe<sub>2</sub>) (7a).** A mixture of **5a** (157 mg, 0.145 mmol) and K(18-crown-6)(C<sub>10</sub>H<sub>8</sub>) (63 mg, 0.14 mmol) was suspended in Et<sub>2</sub>O (20 mL), giving a green mixture which turned magenta as it was frozen in a  $-196\text{ }^\circ\text{C}$  cold well (corresponding to N<sub>2</sub> binding to form **5a-N<sub>2</sub>**). A sample of **6** (64 mg, 0.14 mmol) was dissolved in Et<sub>2</sub>O (5 mL), and this solution was frozen as well. Immediately upon thawing, the silane solution was added to the stirring red mixture of **5a-N<sub>2</sub>** and K(18-crown-6)(C<sub>10</sub>H<sub>8</sub>) using a cooled pipet (which was cooled by repeatedly sucking the thawing silane solution up and down), leading to an immediate color change to brown. The reaction mixture warmed to ambient temperature and was stirred for 20 minutes. Volatile materials were removed under vacuum to give a brown solid, which was then

extracted with toluene (12 mL) and filtered over Celite to give a brown filtrate. Volatile materials were removed under vacuum, and the resulting brown solid was dissolved in HMDSO (8 mL). The brown solution was concentrated under vacuum to 4 mL and placed in a  $-35\text{ }^{\circ}\text{C}$  freezer overnight yielding brown crystals of **7a** (34 mg, 32%).  $^1\text{H NMR}$  (500 MHz,  $\text{C}_6\text{D}_6$ )  $\delta$  27 (2H), 21 (2H), 16 (4H), 10 (9H), 6.6 (6H), 5.9 (2H), 5.2 (12H), 2.3 (6H), 0.3 (6H),  $-0.2$  (6H),  $-12$  (2H),  $-155$  (1H) ppm. Three resonances corresponding to 6H, 2H, and 2H were not found. These resonances may be broadened or hidden under solvent peaks.  $\mu_{\text{eff}}$  (Evans,  $\text{C}_6\text{D}_6$ , 298 K) = 5.0(2)  $\mu_{\text{B}}$ . Zero-field Mössbauer (solid, 80 K)  $\delta = 0.33\text{ mm s}^{-1}$ ,  $|\Delta E_{\text{Q}}| = 1.58\text{ mm s}^{-1}$ ,  $\Gamma_{\text{L}} = 0.27\text{ mm s}^{-1}$ ,  $\Gamma_{\text{R}} = 0.32\text{ mm s}^{-1}$ . IR (ATR, neat,  $\text{cm}^{-1}$ ): 3070 (w), 2971 (m), 2932 (w), 2899 (w), 2879 (w), 1541 (w), 1521 (m), 1467 (m), 1440 (m), 1387 (m), 1369 (m), 1317 (s), 1251 (m), 1239 (m), 1196 (w), 1175 (m), 1151 (w), 1110 (m), 1060 (m), 1048 (m), 1019 (m), 964 (w), 956 (w), 935 (m), 914 (m), 857 (s), 838 (s), 816 (s), 793 (s), 758 (s), 729 (m), 715 (s), 670 (m), 656 (s), 616 (m), 604 (m), 559 (m), 540 (m), 524 (m), 489 (m), 440 (m), 413 (m), 403 (m). UV-vis (hexanes,  $\epsilon$  in  $\text{mM}^{-1}\text{cm}^{-1}$ ): 566 (1.2), 492 (2.2), 428 (6.7), 314 (23) nm. Anal. Calcd for  $\text{C}_{39}\text{H}_{68}\text{FeN}_4\text{Si}_3$ : C, 63.90; H, 9.35; N, 7.64. Found: C, 63.55; H, 9.37; N, 6.78. The found %N is significantly off from the calculated %N, and the reason is unknown.

**Degradation of 7a.** A mixture of **5a** (8.6 mg, 0.0080 mmol) and K(18-crown-6)( $\text{C}_{10}\text{H}_8$ ) (3.4 mg, 0.0080 mmol) was suspended in  $\text{Et}_2\text{O}$  (2 mL), giving a green mixture which turned magenta as it was frozen in a  $-196\text{ }^{\circ}\text{C}$  cold well (corresponding to  $\text{N}_2$  binding to form **5a-N<sub>2</sub>**). A sample of **6** (3.5 mg, 0.0080 mmol) was dissolved in  $\text{Et}_2\text{O}$  (1 mL), and this solution was frozen as well. Immediately upon thawing, the silane solution was added to the stirring red mixture of **5a-N<sub>2</sub>** and K(18-crown-6)( $\text{C}_{10}\text{H}_8$ ) using a cooled pipet, leading to an immediate color change to brown. The reaction mixture warmed to ambient temperature and was stirred for 10 minutes. Volatile materials

were removed under vacuum to give a brown residue, which was extracted with C<sub>6</sub>D<sub>6</sub> (0.6 mL). The brown solution was transferred to a resealable NMR tube containing an internal NiCp<sub>2</sub> standard capillary and subsequently heated to 80 °C for 2 hours, leading to a color change to orange. Quantification by <sup>1</sup>H NMR spectroscopy showed the complete consumption of the *in situ* formed **7a** and the formation of **4a** (24%), **8** (29%), and the iron(II) amido complex LFeN(Me<sub>2</sub>Si(CH<sub>2</sub>)<sub>2</sub>SiMe<sub>2</sub>) (36%) which was identified by X-ray diffraction on crystals grown from a scaled-up reaction. The mechanism of formation for the iron(II) amido complex LFeN(Me<sub>2</sub>Si(CH<sub>2</sub>)<sub>2</sub>SiMe<sub>2</sub>) is unknown at this time. Trapping experiments with excess NC<sup>t</sup>Bu, PPh<sub>3</sub>, or *trans*-stilbene gave no nitrene coupled products, arguing against the formation of an alkylnitrene intermediate.

**Isolation of LFeN(Me<sub>2</sub>Si(CH<sub>2</sub>)<sub>2</sub>SiMe<sub>2</sub>) from the degradation of 7a.** A mixture of **5a** (88 mg, 0.081 mmol) and K(18-crown-6)(C<sub>10</sub>H<sub>8</sub>) (35 mg, 0.081 mmol) was suspended in Et<sub>2</sub>O (16 mL), giving a green mixture which turned magenta as it was frozen in a -196 °C cold well (corresponding to N<sub>2</sub> binding to form **5a-N<sub>2</sub>**). A sample of **6** (36 mg, 0.081 mmol) was dissolved in Et<sub>2</sub>O (2 mL), and this solution was frozen as well. Immediately upon thawing, the silane solution was added to the stirring red mixture of **5a-N<sub>2</sub>** and K(18-crown-6)(C<sub>10</sub>H<sub>8</sub>) using a cooled pipet, leading to an immediate color change to brown. The reaction mixture warmed to ambient temperature and was stirred for 15 minutes. Volatile materials were removed under vacuum to give a brown solid, which was then suspended in C<sub>6</sub>H<sub>6</sub> (20 mL). The resulting brown suspension was heated to 80 °C for 90 minutes, during which time the color of the solution changed from brown to orange. Volatile materials were removed under vacuum, and the resulting brown solid was extracted with hexanes (10 mL) and filtered over Celite. The brown filtrate was concentrated under vacuum to 2 mL and placed in a -35 °C freezer overnight yielding brownish-yellow crystals of

LFen(Me<sub>2</sub>Si(CH<sub>2</sub>)<sub>2</sub>SiMe<sub>2</sub>) (12 mg). This complex was only partially characterized by <sup>1</sup>H NMR spectroscopy and X-ray crystallography. <sup>1</sup>H NMR (400 MHz, C<sub>6</sub>D<sub>6</sub>): δ 108 (4H), 78 (1H), 59 (6H), -1.9 (12H), -2.1 (4H), -3.3 (12H), -50 (2H), -57 (12H), -128 (4H) ppm.

**Conversion of 5b to LFeNN(Me<sub>2</sub>Si(CH<sub>2</sub>)<sub>2</sub>SiMe<sub>2</sub>) (8).** A sample of **5b** (14.5 mg, 0.0143 mmol) was dissolved in Et<sub>2</sub>O (3 mL), yielding a green solution that turned magenta as it was frozen in -196 °C cold well (corresponding to N<sub>2</sub> binding to form **5b-N<sub>2</sub>**). A sample of **6** (3.2 mg, 0.0072 mmol) was dissolved in Et<sub>2</sub>O (1 mL), and this solution was frozen as well. Immediately upon thawing, the silane solution was added to the stirring red solution of **5b-N<sub>2</sub>** using a cooled pipet, leading to an immediate color change from red to brown. The reaction mixture warmed to ambient temperature and was stirred for 1 hour, giving an orange solution. Volatile materials were removed under vacuum to give a yellow residue, which was then extracted with C<sub>6</sub>D<sub>6</sub> (0.6 mL). Quantification by <sup>1</sup>H NMR spectroscopy (comparing to an external NiCp<sub>2</sub> capillary) showed the formation of **4b** (64%) and **8** (22%).

**Independent Synthesis of 8.** A sample of **9** (309 mg, 0.313 mmol) was dissolved in Et<sub>2</sub>O (12 mL), yielding a green solution that turned magenta as it was frozen in a -196 °C cold well. A sample of 1,2-bis(chlorodimethylsilyl)ethane (74 mg, 0.34 mmol) was dissolved in Et<sub>2</sub>O (3 mL), and this solution was frozen as well. Immediately upon thawing, the silane solution was added to the stirring red solution of **9** using a cooled pipet, leading to an immediate color change to brown. The reaction mixture warmed to ambient temperature and was stirred for 50 minutes. Volatile materials were removed under vacuum to give a brown solid. The solid was extracted with HMDSO (40 mL) and filtered over Celite. The resulting brown filtrate was concentrated to 15 mL and placed in a -35 °C freezer overnight yielding a mixture of brown and yellow solids. The supernatant was decanted, and the solids were triturated with HMDSO (3 x 1 mL). The remaining solids were

dissolved in hexanes (2 mL) and filtered through Celite. The brown filtrate was placed in a  $-35\text{ }^{\circ}\text{C}$  freezer overnight yielding brown crystals of **8** (30 mg, 22%).  $^1\text{H}$  NMR (400 MHz,  $\text{C}_6\text{D}_6$ ) spectra can be assigned as a mixture of the two spin isomers: Spin isomer #1:  $\delta$  52 (1H), 10.3 (12H), 1.9 (4H),  $-2.4$  (2H),  $-3.7$  (6H),  $-3.8$  (4H),  $-5.7$  (12H),  $-27$  (12H),  $-34$  (4H) ppm. Spin isomer #2:  $\delta$  16 (4H), 11.5 (6H), 11.3 (2H), 10.8 (12H),  $-0.3$  (12H),  $-3.2$  (12H),  $-52$  (1H),  $-54$  (4H) ppm. One resonance corresponding to 4H was not found for spin isomer #2. This resonance may be broadened or hidden under solvent peaks.  $\mu_{\text{eff}}$  (Evans,  $\text{C}_6\text{D}_6$ , 298 K) = 2.9(1)  $\mu_{\text{B}}$ . Zero-field Mössbauer (solid, 80 K) Spin isomer #1:  $\delta = 0.13\text{ mm s}^{-1}$ ,  $|\Delta E_{\text{Q}}| = 2.13\text{ mm s}^{-1}$ ,  $\Gamma_{\text{L}} = 0.50\text{ mm s}^{-1}$ ,  $\Gamma_{\text{R}} = 0.36\text{ mm s}^{-1}$ . Spin isomer #2:  $\delta = 0.51\text{ mm s}^{-1}$ ,  $|\Delta E_{\text{Q}}| = 1.75\text{ mm s}^{-1}$ ,  $\Gamma_{\text{L}} = 0.50\text{ mm s}^{-1}$ ,  $\Gamma_{\text{R}} = 0.39\text{ mm s}^{-1}$ . IR (ATR, neat,  $\text{cm}^{-1}$ ): 3068 (w), 2969 (m), 2936 (w), 2904 (w), 2877 (w), 2811 (w), 1630 (w), 1588 (w), 1531 (w), 1465 (w), 1440 (m), 1383 (s), 1321 (s), 1251 (s), 1202 (w), 1180 (w), 1151 (w), 1128 (w), 1106 (w), 1060 (w), 1003 (m), 953 (s), 898 (m), 877 (m), 845 (s), 824 (s), 795 (s), 771 (s), 760 (s), 699 (m), 672 (m), 637 (w), 621 (m), 563 (w), 549 (w), 540 (w), 526 (w), 520 (w), 503 (w), 475 (w), 440 (m). UV-vis (hexanes,  $\epsilon$  in  $\text{mM}^{-1}\text{cm}^{-1}$ ): 480 (1.2), 437 (1.7), 401 (2.9), 319 (14), 287 (12) nm. Anal. Calcd for  $\text{C}_{37}\text{H}_{57}\text{FeN}_4\text{Si}_2$ : C, 65.09; H, 8.90; N, 8.67. Found: C, 60.98; H, 8.34; N, 5.97. The microanalytical data are significantly off from the calculated values, which may indicate impurities.

**Conversion of 5c to  $\text{LFeN}(\text{Me}_2\text{Si}(\text{CH}_2)_2\text{SiMe}_2)\text{NMe}$  (10).** A sample of **5c** (9.9 mg, 0.011 mmol) was dissolved in  $\text{Et}_2\text{O}$  (2 mL), yielding a green solution that turned red as it was frozen in a  $-196\text{ }^{\circ}\text{C}$  cold well (corresponding to  $\text{N}_2$  binding to form **5c-N<sub>2</sub>**). A sample of **6** (2.5 mg, 0.0056 mmol) was dissolved in  $\text{Et}_2\text{O}$  (1 mL), and this solution was frozen as well. Immediately upon thawing, the silane solution was added to the stirring red solution of **5c-N<sub>2</sub>** using a cooled pipet, leading to an immediate color change from red to brown. The reaction mixture warmed to ambient

temperature and was stirred for 50 minutes, giving a yellow solution. Volatile materials were removed under vacuum to give a yellow residue, which was then extracted with C<sub>6</sub>D<sub>6</sub> (0.5 mL). Quantification by <sup>1</sup>H NMR spectroscopy (comparing to a NiCp<sub>2</sub> capillary) showed the formation of **4c** (57%) and **10** (37%).

**Independent Synthesis of 10.** A solution of 1,2-bis(chlorodimethylsilyl)ethane (249.6 mg, 1.160 mmol) in Et<sub>2</sub>O (1 mL) was added dropwise to a solution of methylhydrazine (183 μL, 3.48 mmol) in Et<sub>2</sub>O (1 mL), leading to the immediate formation of a white precipitate. The reaction mixture was heated to 50 °C and stirred vigorously for 21 hours. The white solid was filtered off using a glass frit, and the solid was washed with Et<sub>2</sub>O (5 mL). The two colorless filtrates were combined, and n-BuLi (0.82 mL, 1.3 mmol) was added dropwise leading to an immediate color change to yellow. The reaction mixture was stirred for 1 hour, during which the solution became cloudy. Volatile materials were removed under vacuum to give a yellow oil which was then redissolved in pentane (5 mL). Volatile materials were once again removed under vacuum to give a yellow oil (<sup>1</sup>H NMR spectrum is consistent with the assignment of LiN(Me<sub>2</sub>Si(CH)<sub>2</sub>SiMe<sub>2</sub>)NMe) which was used without further purification. A sample of this oil (123.5 mg, 0.64 mmol) was dissolved in toluene (4 mL) and added dropwise to a stirring orange suspension of [LFeBr]<sub>2</sub> (234.0 mg, 0.21 mmol) in toluene (10 mL), leading to an immediate color change to yellow-brown. The reaction was stirred at ambient temperature for 3 hours. Volatile materials were removed under vacuum to give a yellow-brown solid. The solid was extracted with pentane (10 mL) and filtered over Celite. The resulting yellow-brown filtrate was concentrated under vacuum to 2 mL and placed in a –35 °C freezer for 1 day, yielding yellow crystalline **10** (58.8 mg, 21%). <sup>1</sup>H NMR (500 MHz, C<sub>6</sub>D<sub>6</sub>) δ 167 (3H), 129 (1H), 106 (2H), 61 (6H), –10 (12H), –16 (4H), –59 (2H), –86 (12H) ppm. Four resonances corresponding to 2H, 4H, 6H, and 6H were not found. These resonances may be

broadened or hidden under solvent peaks.  $\mu_{\text{eff}}$  (Evans,  $\text{C}_6\text{D}_6$ , 298 K) = 5.1(2)  $\mu_{\text{B}}$ . Zero-field Mössbauer (solid, 80 K): as described below (Fig. S21-22), there were two alternative fits. The three-component fit is given here.  $\eta^2 S = 2$  isomer (9%):  $\delta = 0.98 \text{ mm s}^{-1}$ ,  $|\Delta E_{\text{Q}}| = 1.45 \text{ mm s}^{-1}$ ;  $\eta^2 S = 1$  isomer (37%):  $\delta = 0.55 \text{ mm s}^{-1}$ ,  $|\Delta E_{\text{Q}}| = 1.28 \text{ mm s}^{-1}$ ;  $\eta^1 S = 2$  isomer (54%):  $\delta = 0.68 \text{ mm s}^{-1}$ ,  $|\Delta E_{\text{Q}}| = 0.96 \text{ mm s}^{-1}$ . IR (ATR, neat,  $\text{cm}^{-1}$ ): 3068 (w), 2969 (m), 2936 (m), 2912 (m), 2877 (m), 2828 (w), 2780 (w), 1529 (m), 1465 (m), 1385 (s), 1319 (m), 1284 (m), 1264 (m), 1249 (m), 1198 (m), 1180 (m), 1103 (m), 1081 (m), 1060 (m), 1025 (m), 972 (m), 941 (m), 873 (m), 824 (s), 795 (m), 777 (m), 760 (s), 703 (m), 684 (m), 637 (m), 602 (m), 586 (m), 462 (m) 446 (m), 417 (m). UV-vis (hexanes,  $\epsilon$  in  $\text{mM}^{-1}\text{cm}^{-1}$ ): 486 (0.61), 463 (0.91), 405 (2.9), 379 (6.2), 333 (12), 280 (8.3) nm. Anal. Calcd for  $\text{C}_{36}\text{H}_{60}\text{FeN}_4\text{Si}_2 \cdot 0.7 \text{ C}_5\text{H}_{12}$  (pentane): C, 64.61; H, 9.39; N, 7.63. Found: C, 64.53; H, 9.04; N, 7.44.

**Preparation of  $\text{LFeN(Ph)N(Me}_2\text{Si(CH}_2\text{)}_2\text{SiMe}_2)$  **12**.** A mixture of **1** (91 mg, 0.098 mmol) and  $\text{K(18-crown-6)(C}_{10}\text{H}_8)$  (42 mg, 0.098 mmol) were suspended in  $\text{Et}_2\text{O}$  (12 mL), yielding a green mixture that turned red-purple as it was frozen in a  $-196 \text{ }^\circ\text{C}$  cold well (corresponding to  $\text{N}_2$  binding to form **1-N**<sub>2</sub>). A sample of **6** (43 mg, 0.098 mmol) was dissolved in  $\text{Et}_2\text{O}$  (2 mL), and this solution was frozen as well. Immediately upon thawing, the silane solution was added to the stirring red mixture of **1-N**<sub>2</sub> and  $\text{K(18-crown-6)(C}_{10}\text{H}_8)$  with a cooled pipet, leading to an immediate color change to brown. The reaction mixture warmed to ambient temperature and was stirred for 25 minutes. Volatile materials were removed under vacuum to give a reddish-brown residue, which was then extracted with pentane (10 mL) and filtered over Celite. The red filtrate was concentrated under vacuum to 3 mL and filtered over Celite once more, and the filter was washed with pentane (2 mL). The two filtrates were combined and concentrated under vacuum to 4 mL and placed in a  $-35 \text{ }^\circ\text{C}$  freezer overnight yielding red crystals of **12** (32 mg, 45%).  $^1\text{H NMR}$  (400 MHz,  $\text{C}_6\text{D}_6$ )

$\delta$  61 (6H), 56 (6H), 48 (1H), 41 (1H), 39 (2H), 34 (6H), 28 (2H), -0.9 (2H), -4 (2H), -21 (6H), -28 (6H), -47 (2H), -70 (6H), -73 (6H), -91 (1H), -188 (2H) ppm. Four resonances corresponding to 4H, 1H, 1H, and 1H were not found. These resonances may be broadened or hidden under solvent peaks. There were small peaks corresponding to apparent impurities in the proton NMR spectrum.  $\mu_{\text{eff}}$  (Evans,  $\text{C}_6\text{D}_6$ , 298 K) = 5.7(2)  $\mu_{\text{B}}$ . Zero-field Mössbauer (solid, 80 K)  $\delta$  = 0.68 mm  $\text{s}^{-1}$ ,  $|\Delta E_{\text{Q}}|$  = 1.40 mm  $\text{s}^{-1}$ ,  $\Gamma_{\text{L}}$  = 0.40 mm  $\text{s}^{-1}$ ,  $\Gamma_{\text{R}}$  = 0.46 mm  $\text{s}^{-1}$ . IR (ATR, neat,  $\text{cm}^{-1}$ ): 3070 (w), 2969 (m), 2936 (w), 2918 (w), 2908 (w), 2879 (w), 2809 (w), 1607 (w), 1588 (w), 1566 (w), 1523 (m), 1488 (w), 1467 (m), 1440 (m), 1385 (s), 1364 (s), 1317 (s), 1299 (w), 1280 (w), 1249 (s), 1200 (w), 1177 (m), 1147 (w), 1110 (m), 1101 (m), 1071 (w), 1023 (m), 984 (w), 966 (w), 933 (s), 869 (m), 847 (s), 808 (m), 795 (s), 785 (s), 760 (s), 750 (s), 721 (m), 627 (m), 602 (w), 565 (w), 551 (w), 520 (w), 495 (w), 479 (w), 442 (m), 419 (w), 401 (s). UV-vis (hexanes,  $\epsilon$  in  $\text{mM}^{-1}\text{cm}^{-1}$ ): 493 (1.1), 452 (2.5), 378 (9.6), 328 (13), 300 (12), 269 (14) nm. Anal. Calcd for  $\text{C}_{41}\text{H}_{62}\text{FeN}_4\text{Si}_2$ : C, 68.11; H, 8.64; N, 7.75. Found: C, 67.63; H, 8.43; N, 7.29.



## NMR Spectroscopy

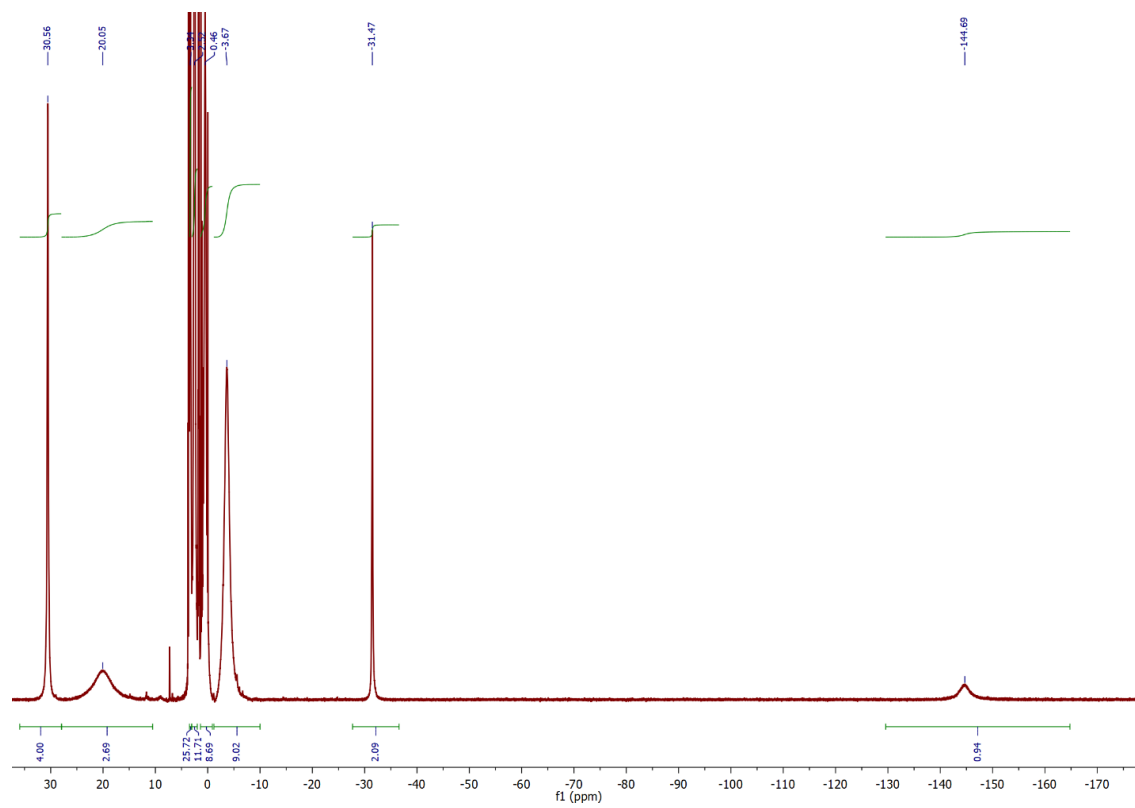

**Figure S1.** <sup>1</sup>H NMR spectrum of [K(18-crown-6)(THF)<sub>2</sub>][LFeCH<sub>2</sub>SiMe<sub>3</sub>] (**5a**) in THF-*d*<sub>8</sub> at 298 K.

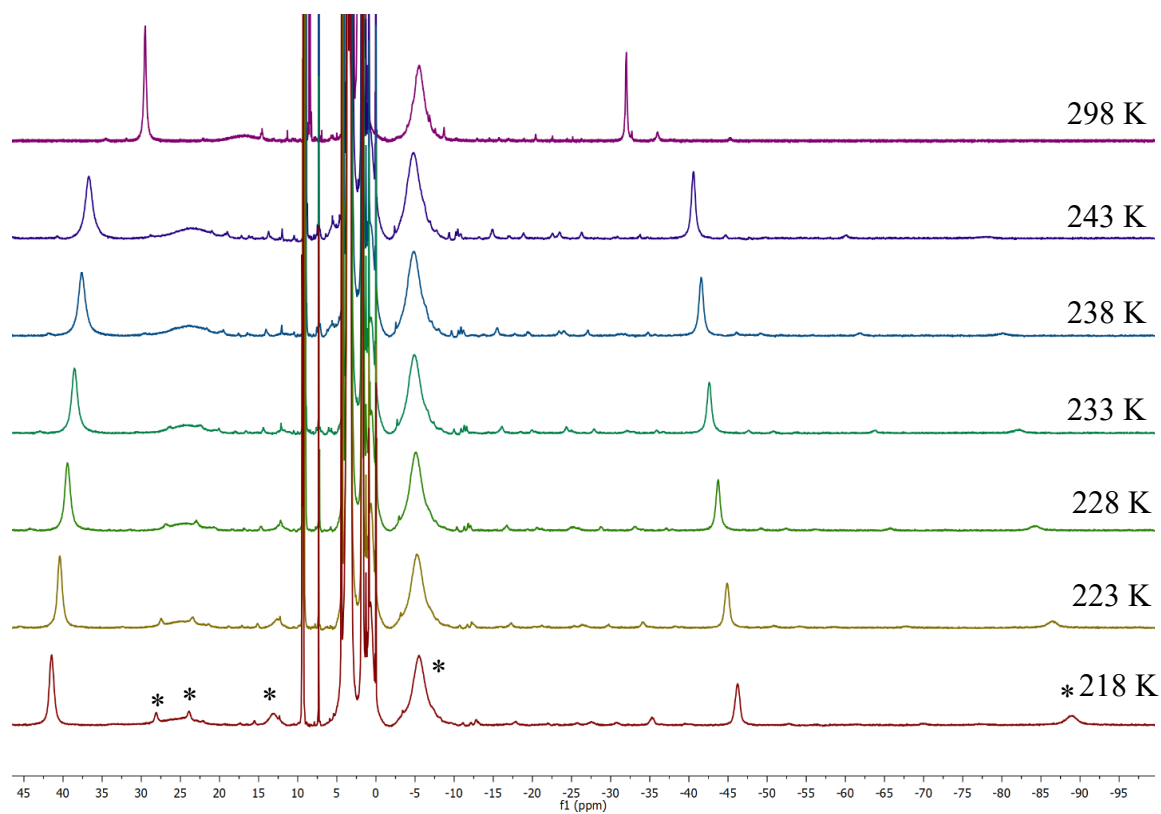

**Figure S2.** Variable-temperature <sup>1</sup>H NMR spectra of [K(18-crown-6)(THF)<sub>2</sub>][LFeCH<sub>2</sub>SiMe<sub>3</sub>] (**5a**) in THF-*d*<sub>8</sub> under an N<sub>2</sub> atmosphere ranging from 298 K to 218 K. Peaks corresponding to the N<sub>2</sub> bound complex are denoted with an asterisk.

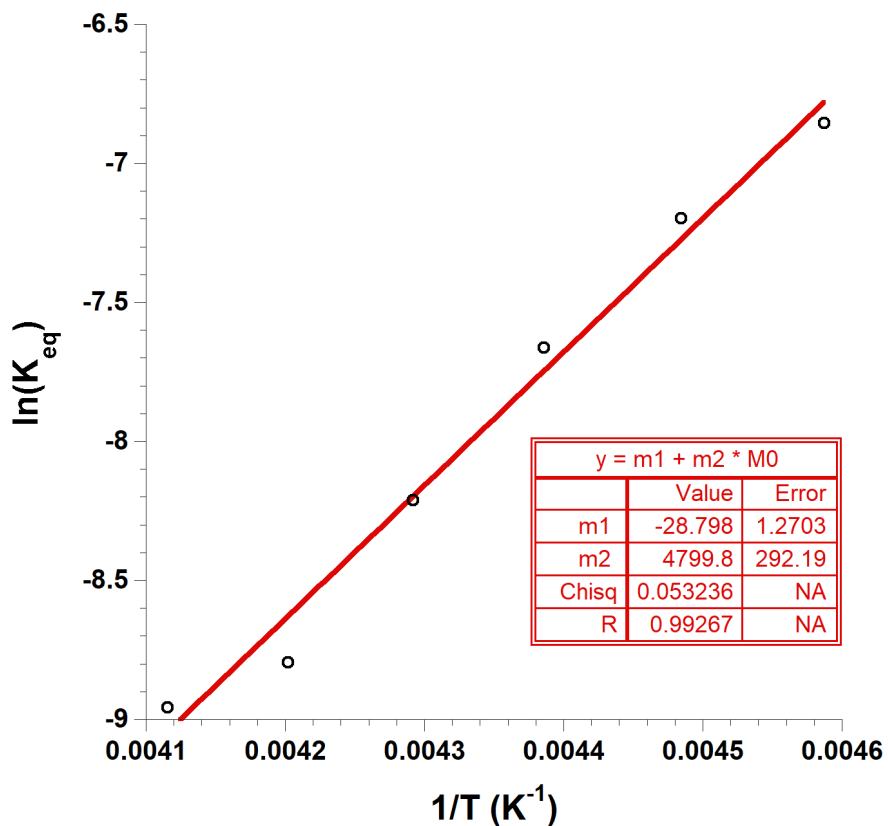

**Figure S3.** Van't Hoff plot for  $N_2$  binding to  $[K(18\text{-crown-}6)(THF)_2][LFeCH_2SiMe_3]$  (**5a**) to form  $[K(18\text{-crown-}6)][LFe(N_2)CH_2SiMe_3]$  (**5a-N<sub>2</sub>**) with points fit to a linear function. The solution concentration of  $N_2$  was calculated using a literature equation,<sup>11</sup> additionally accounting for the pressure changes with temperature in the closed system. The concentrations of **5a** and **5a-N<sub>2</sub>** were determined by integration relative to a nickelocene capillary using the  $^1H$  NMR spectra shown in Figure S2.

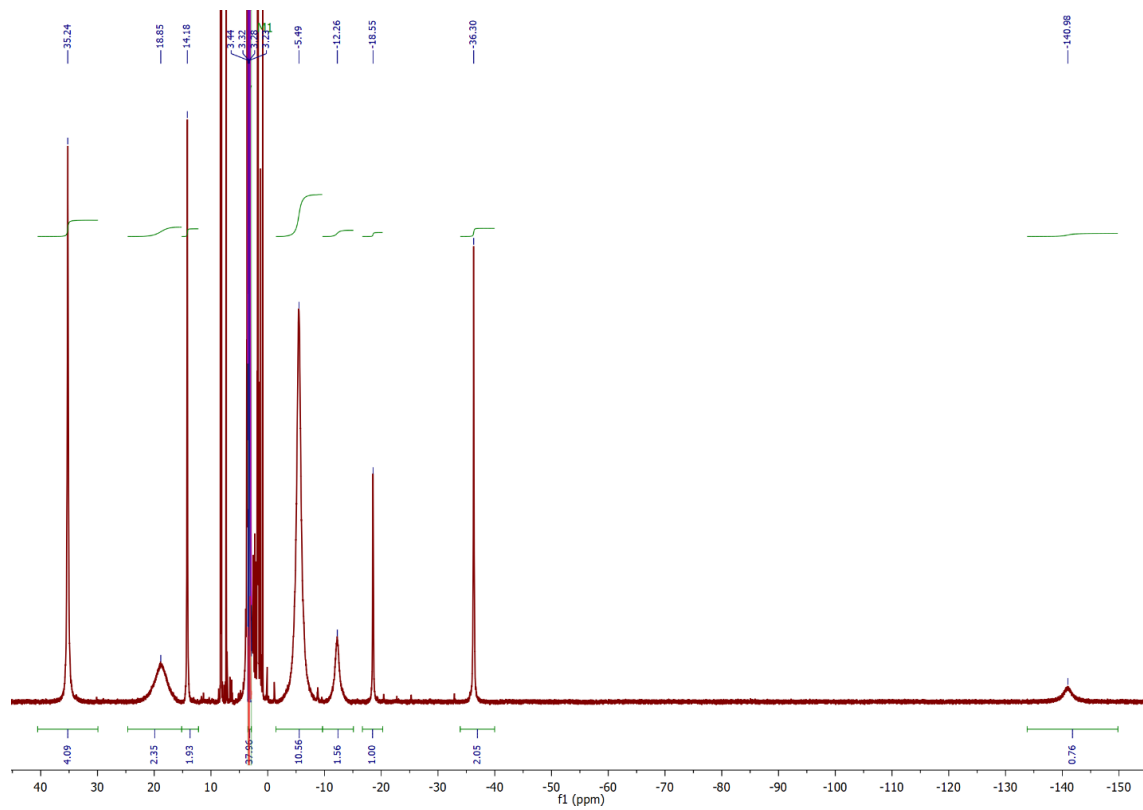

**Figure S4.** <sup>1</sup>H NMR spectrum of [K(18-crown-6)(THF)<sub>2</sub>][LFeBn] (**5b**) in THF-*d*<sub>8</sub> at 298 K.

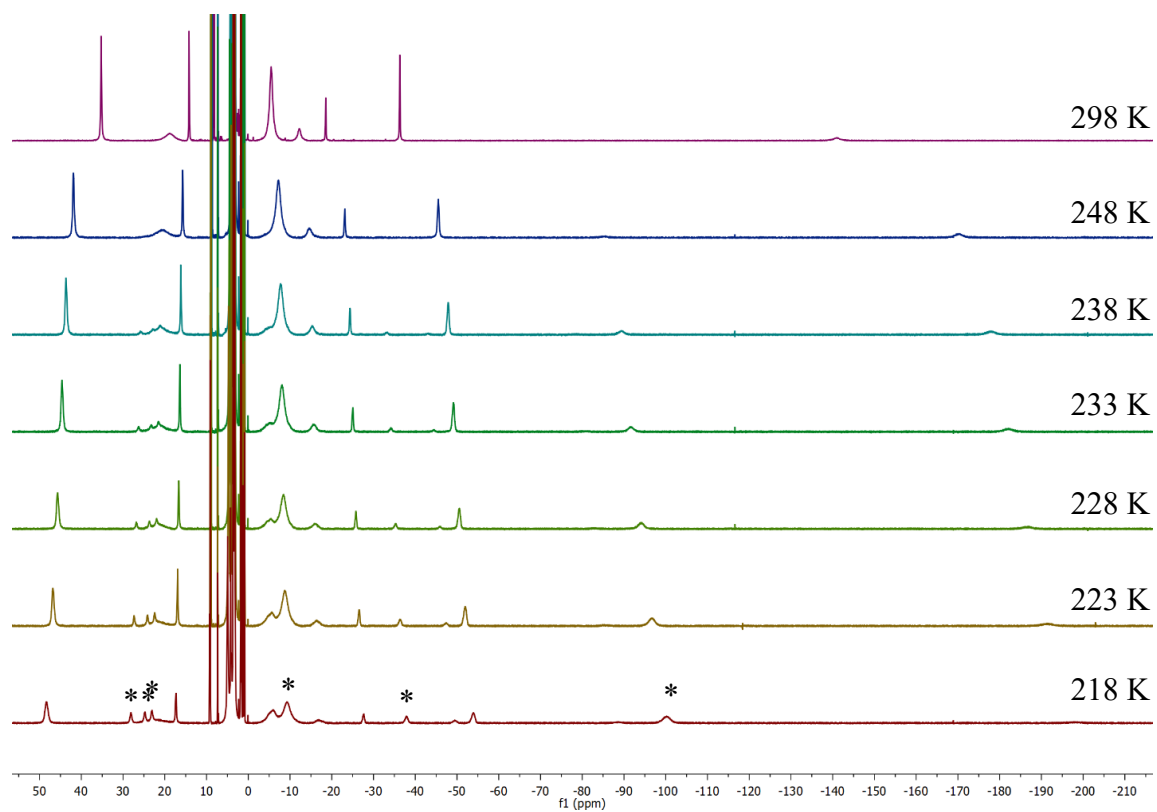

**Figure S5.** Variable-temperature <sup>1</sup>H NMR spectra of [K(18-crown-6)(THF)<sub>2</sub>][LFeBn] (**5b**) in THF-*d*<sub>8</sub> under an N<sub>2</sub> atmosphere ranging from 298 K to 218 K. Peaks corresponding to the N<sub>2</sub> bound complex are denoted by an asterisk.

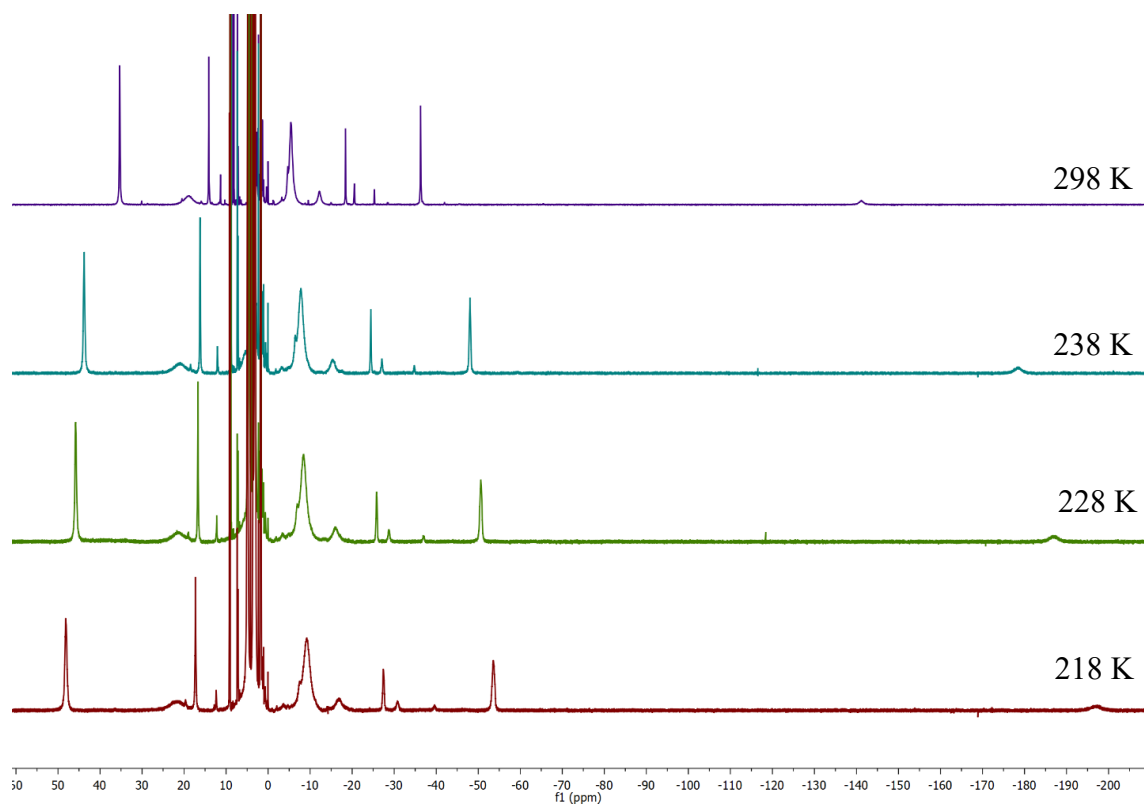

**Figure S6.** Variable-temperature <sup>1</sup>H NMR spectra of [K(18-crown-6)(THF)<sub>2</sub>][LFeBn] (**5b**) in THF-*d*<sub>8</sub> under an Ar atmosphere ranging from 298 K to 218 K.

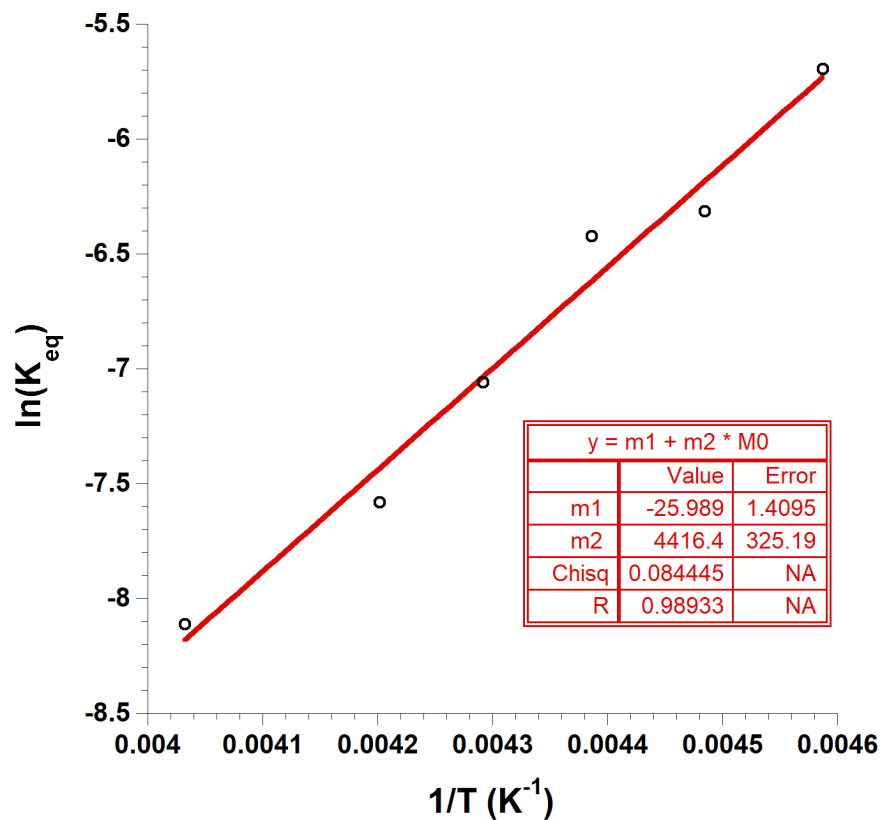

**Figure S7.** Van't Hoff plot for  $N_2$  binding to  $[K(18\text{-crown-6})(THF)_2][LFeBn]$  (**5b**) to form  $[K(18\text{-crown-6})][LFe(N_2)Bn]$  (**5b-N<sub>2</sub>**) with points fit to a linear function. The solution concentration of  $N_2$  was calculated using a literature equation,<sup>11</sup> additionally accounting for the pressure changes with temperature in the closed system. The concentrations of **5b** and **5b-N<sub>2</sub>** were determined by integration relative to a nickelocene capillary using the  $^1H$  NMR spectra shown in Figure S5.

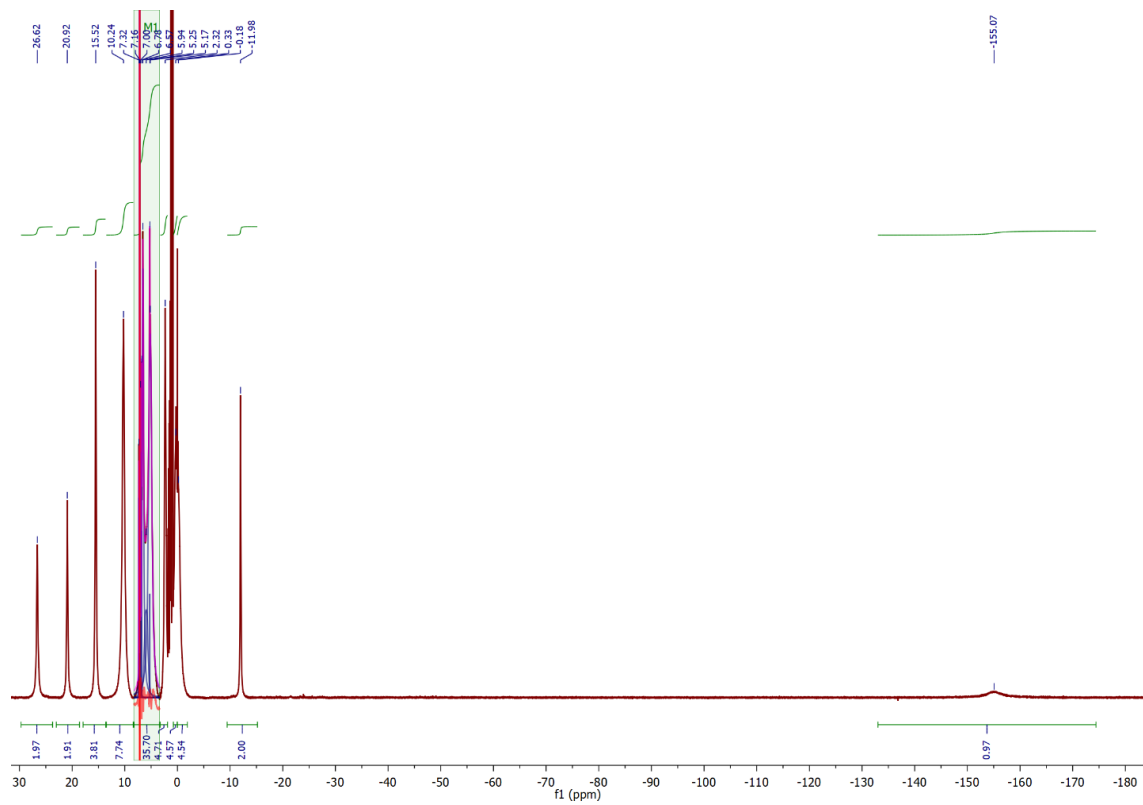

**Figure S8.**  $^1\text{H}$  NMR spectrum of  $\text{LFe}(\text{CH}_2\text{SiMe}_3)\text{NN}(\text{Me}_2\text{Si}(\text{CH}_2)_2\text{SiMe}_2)$  (**7a**) in  $\text{C}_6\text{D}_6$  at 298 K.



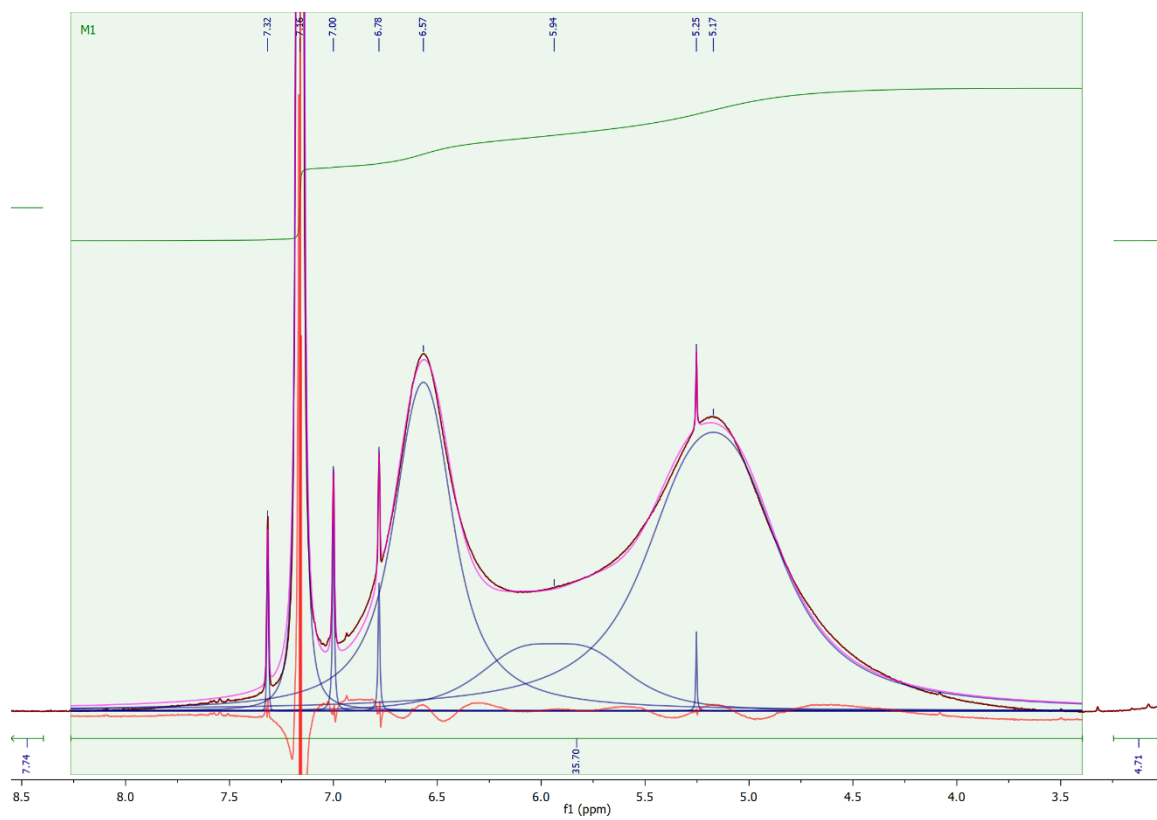

**Figure S9.** Inset of the <sup>1</sup>H NMR spectrum of **7a** in Figure S8 showing the region with overlapping peaks.

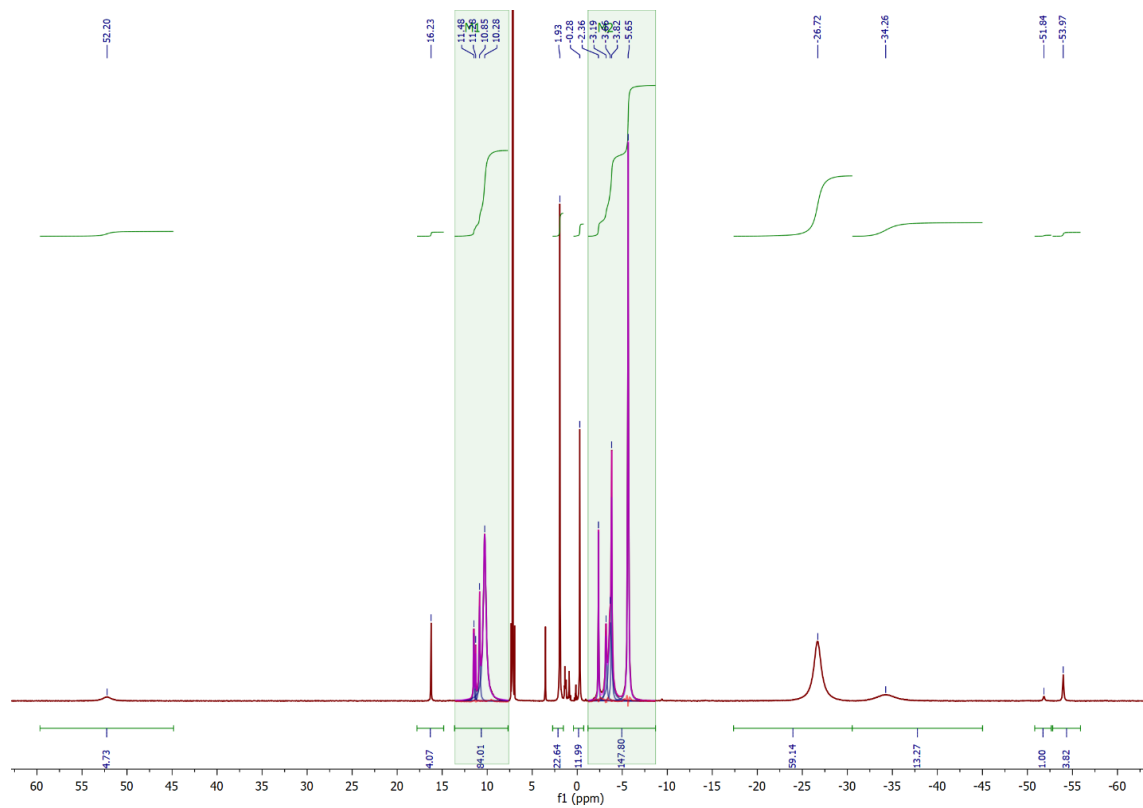

**Figure S10.**  $^1\text{H}$  NMR spectrum of  $\text{LFeNN}(\text{Me}_2\text{Si}(\text{CH}_2)_2\text{SiMe}_2)$  (**8**) in  $\text{C}_6\text{D}_6$  at 298 K.

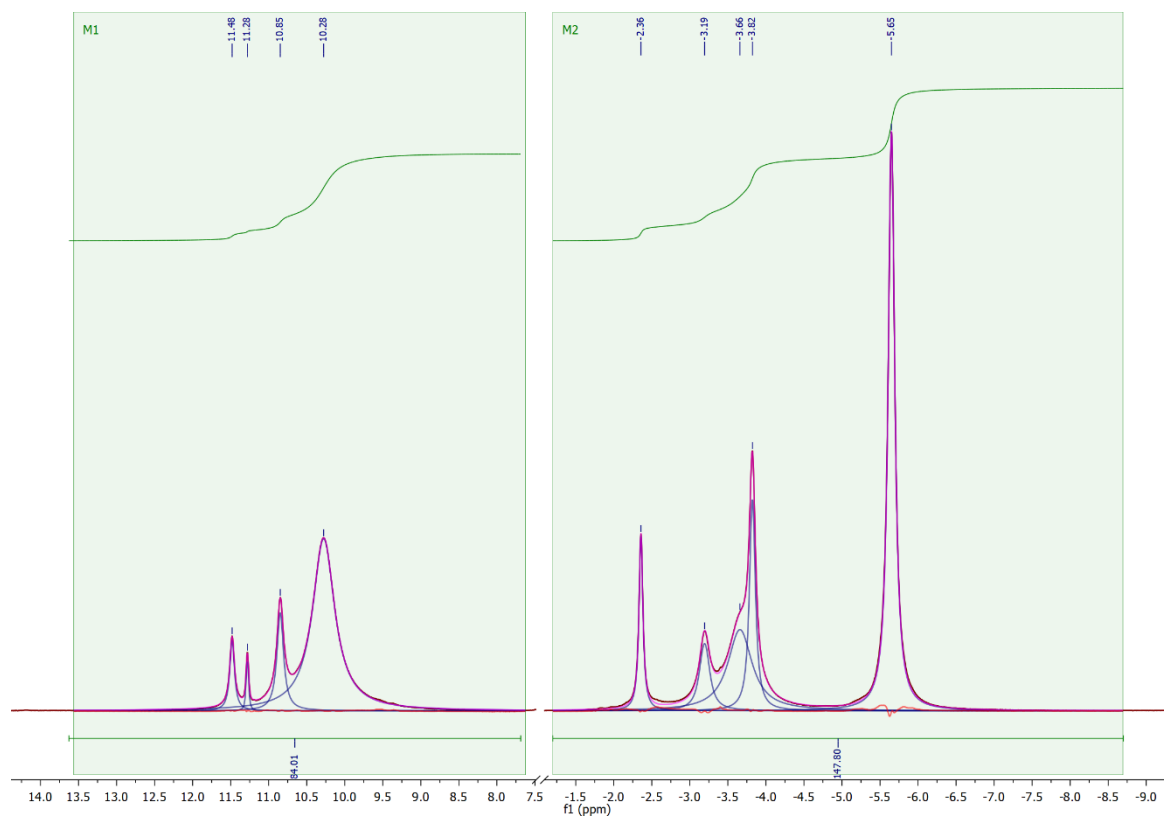

**Figure S11.** Inset of the  $^1\text{H}$  NMR spectrum of **8** in Figure S10 showing the regions with overlapping peaks.

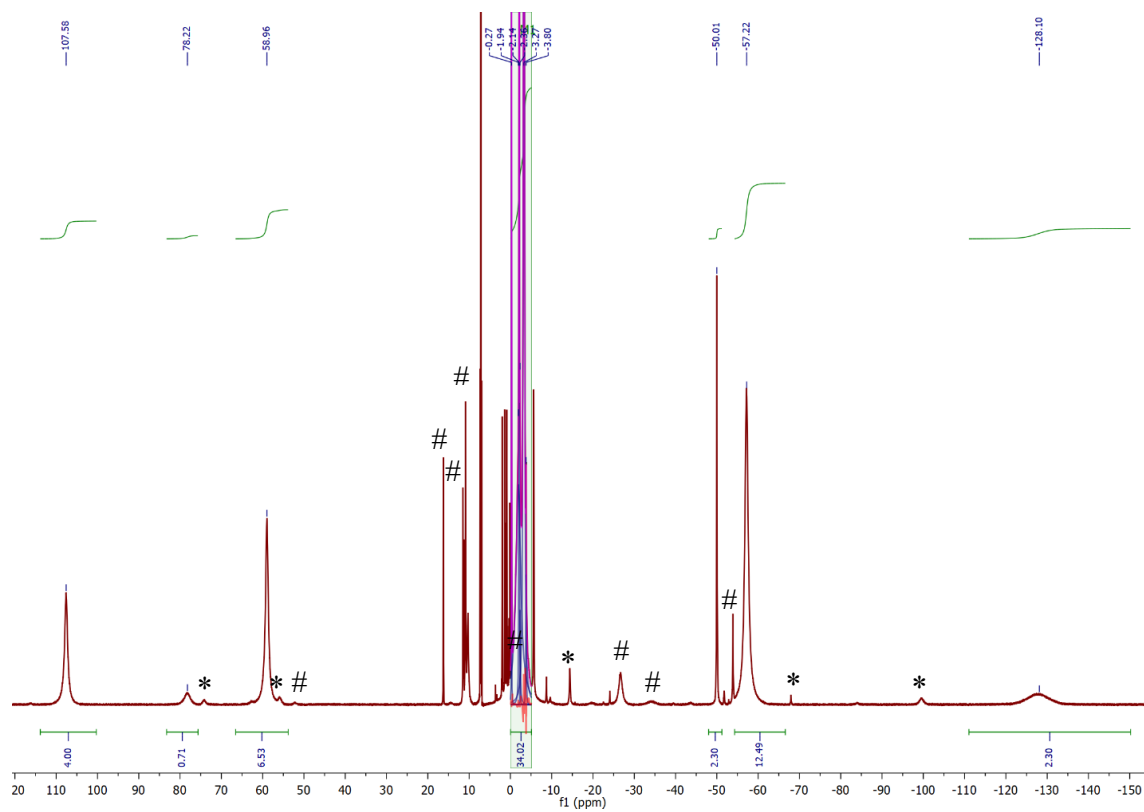

**Figure S12.**  $^1\text{H}$  NMR of  $\text{LFeN}(\text{Me}_2\text{Si}(\text{CH}_2)_2\text{SiMe}_2)$  in  $\text{C}_6\text{D}_6$  at 298 K. Peaks corresponding to known impurities are denoted by \* (**4a**) or # (**8**).

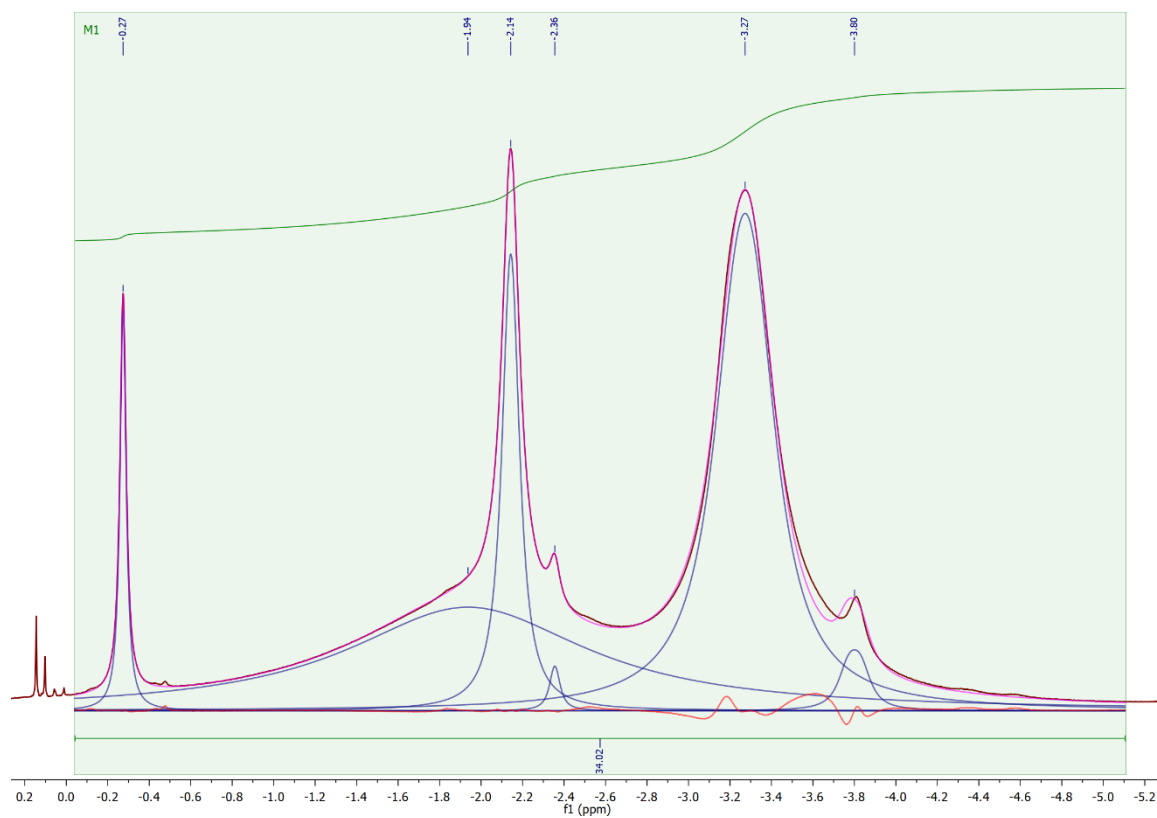

**Figure S13.** Inset of the  $^1\text{H}$  NMR spectrum of  $\text{LFeN}(\text{Me}_2\text{Si}(\text{CH}_2)_2\text{SiMe}_2)$  in Figure S12 showing the region with overlapping peaks.

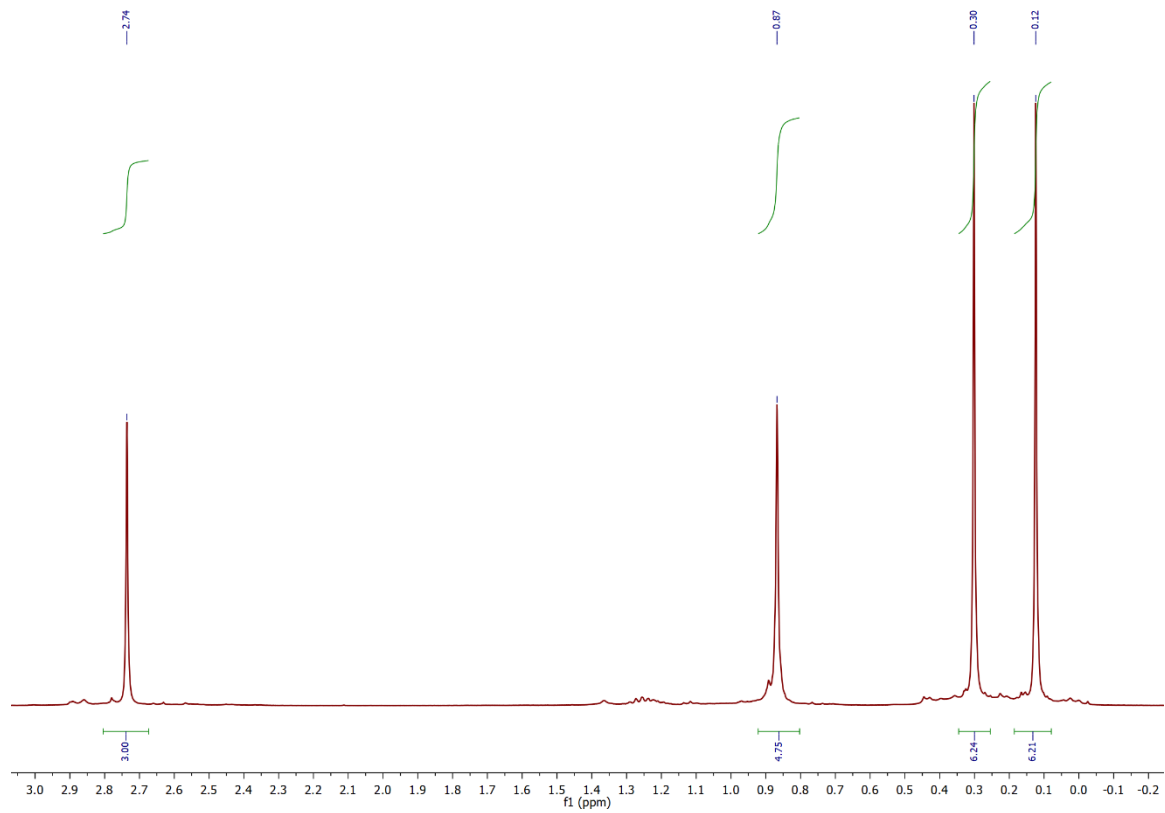

**Figure S14.**  $^1\text{H}$  NMR spectrum of crude  $\text{LiN}(\text{Me}_2\text{Si}(\text{CH}_2)_2\text{SiMe}_2)\text{NMe}$  in  $\text{C}_6\text{D}_6$  at 298 K.

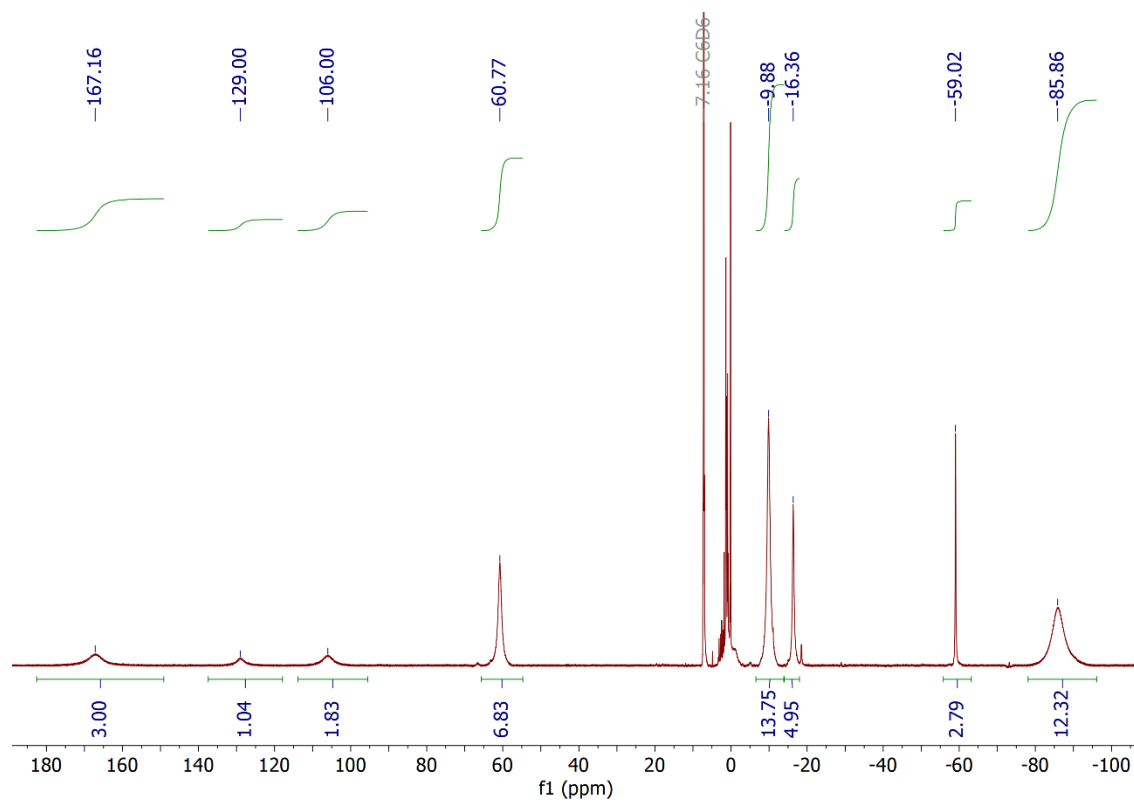

**Figure S15.**  $^1\text{H}$  NMR spectrum of  $\text{LFeN}(\text{Me}_2\text{Si}(\text{CH}_2)_2\text{SiMe}_2)\text{NMe}$  (**10**) in  $\text{C}_6\text{D}_6$  at 298 K.

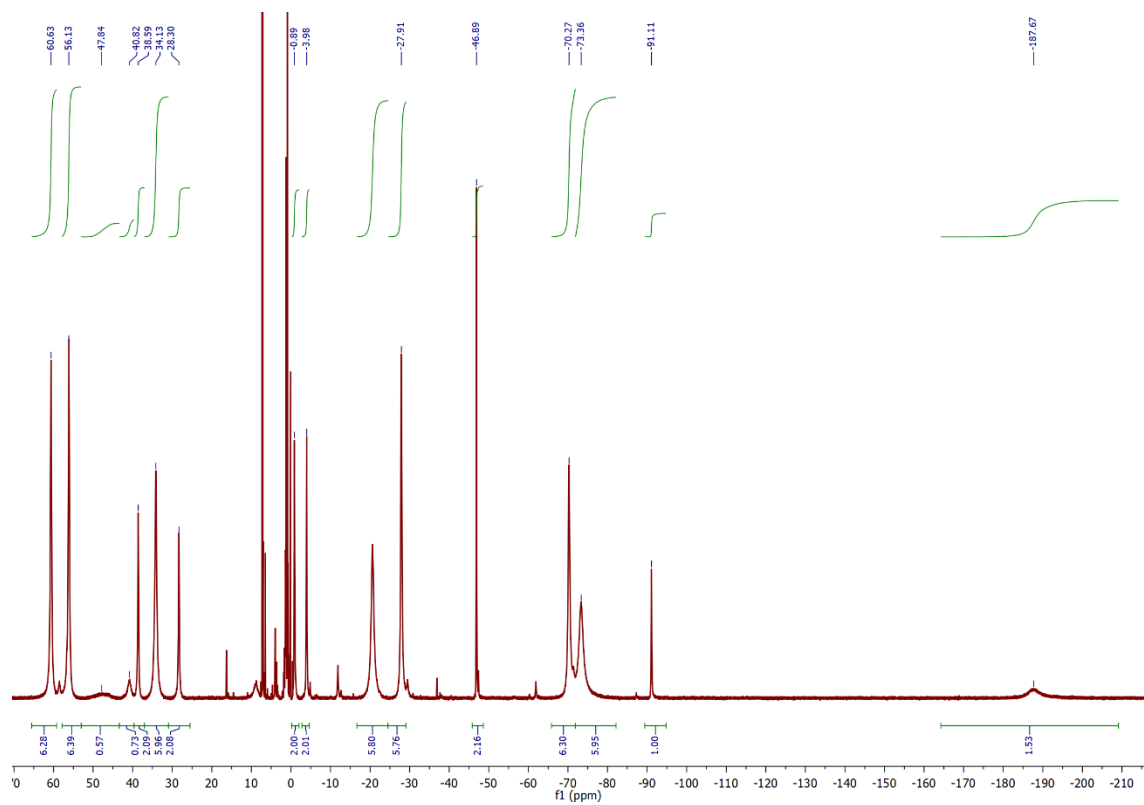

**Figure S16.**  $^1\text{H}$  NMR spectrum of  $\text{LFeN(Ph)N(Me}_2\text{Si(CH}_2\text{)}_2\text{SiMe}_2\text{)}$  (**12**) in  $\text{C}_6\text{D}_6$  at 298 K.



## Mössbauer Spectroscopy

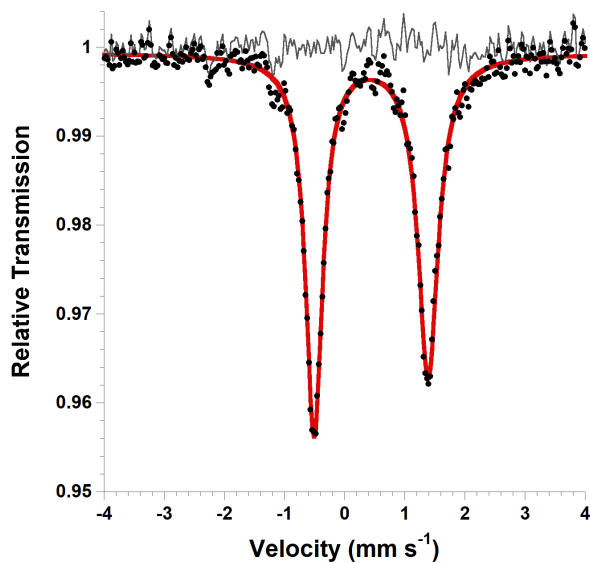

**Figure S17.** Solid state zero-field Mössbauer spectrum of [K(18-crown-6)(THF)<sub>2</sub>][LFeCH<sub>2</sub>SiMe<sub>3</sub>] (**5a**) where the black circles are the data, the red line is a one-component simulation with parameters  $\delta = 0.44$  mm s<sup>-1</sup>,  $|\Delta E_Q| = 1.90$  mm s<sup>-1</sup>,  $\Gamma_L = 0.35$  mm s<sup>-1</sup>,  $\Gamma_R = 0.41$  mm s<sup>-1</sup>, and the gray line is the residual.

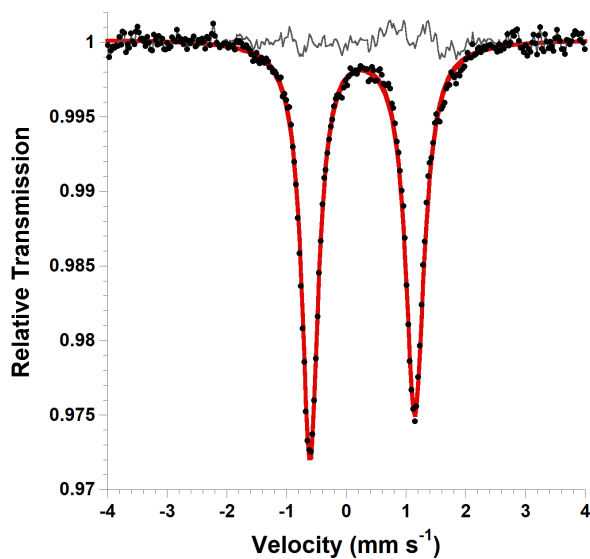

**Figure S18.** Solid state zero-field Mössbauer spectrum of [K(18-crown-6)(THF)<sub>2</sub>][LFeBn] (**5b**) where the black circles are the data, the red line is a one-component simulation with parameters  $\delta$

$= 0.27 \text{ mm s}^{-1}$ ,  $|\Delta E_Q| = 1.75 \text{ mm s}^{-1}$ ,  $\Gamma_L = 0.38 \text{ mm s}^{-1}$ ,  $\Gamma_R = 0.34 \text{ mm s}^{-1}$ , and the gray line is the residual.

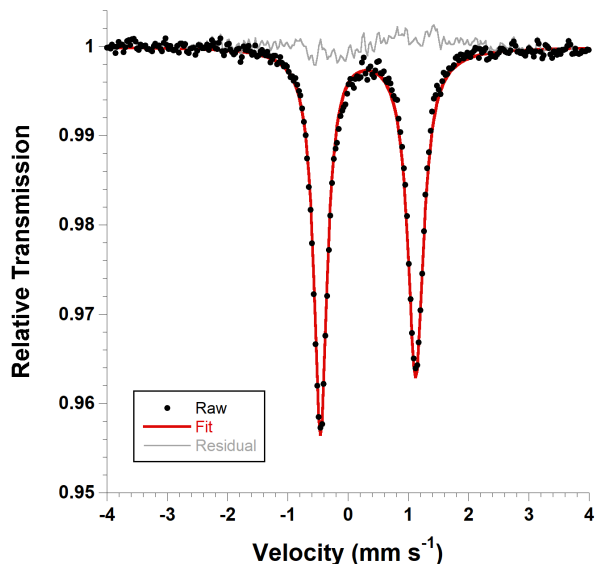

**Figure S19.** Solid state zero-field Mössbauer spectrum of  $\text{LFe}(\text{CH}_2\text{SiMe}_3)\text{NN}(\text{Me}_2\text{Si}(\text{CH}_2)_2\text{SiMe}_2)$  (**7a**) where the black circles are the data, the red line is a one-component simulation with parameters  $\delta = 0.33 \text{ mm s}^{-1}$ ,  $|\Delta E_Q| = 1.58 \text{ mm s}^{-1}$ ,  $\Gamma_L = 0.27 \text{ mm s}^{-1}$ ,  $\Gamma_R = 0.32 \text{ mm s}^{-1}$ , and the gray line is the residual.

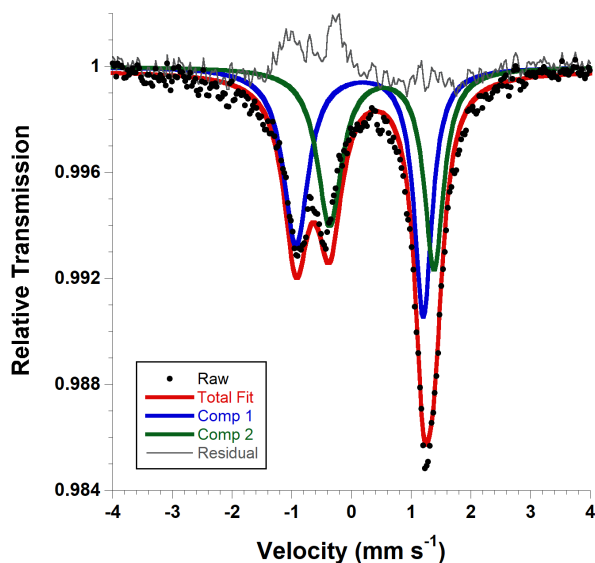

**Figure S20.** Solid state zero-field Mössbauer spectrum of  $\text{LFeNN}(\text{Me}_2\text{Si}(\text{CH}_2)_2\text{SiMe}_2)$  (**8**) where the black circles are the data, the red line is a two-component simulation, and the gray line is the residual. The blue line is a simulation for Component 1 ( $S = 1/2$ ) with parameters  $\delta = 0.13 \text{ mm s}^{-1}$ ,  $|\Delta E_Q| = 2.13 \text{ mm s}^{-1}$ ,  $\Gamma_L = 0.50 \text{ mm s}^{-1}$ ,  $\Gamma_R = 0.36 \text{ mm s}^{-1}$ , and relative area = 53%. The green

line is a simulation for Component 2 ( $S = 3/2$ ) with parameters  $\delta = 0.51 \text{ mm s}^{-1}$ ,  $|\Delta E_Q| = 1.75 \text{ mm s}^{-1}$ ,  $\Gamma_L = 0.50 \text{ mm s}^{-1}$ ,  $\Gamma_R = 0.39 \text{ mm s}^{-1}$ , and relative area = 47%.

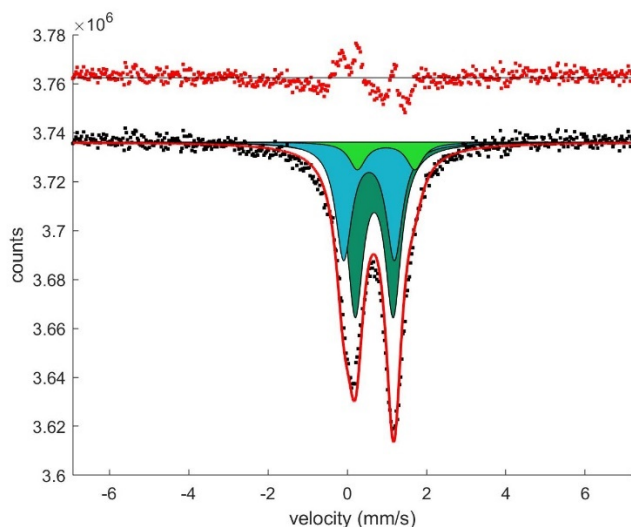

**Figure S21.** Solid state zero-field Mössbauer spectrum of LFeN(Me<sub>2</sub>Si(CH<sub>2</sub>)<sub>2</sub>SiMe<sub>2</sub>)NMe (**10**) where the black circles are the data, the red line is a two-component simulation, and the red circles are the residual. Fit parameters: dark green doublet ( $\eta^1$  ( $S = 2$ ), 54%):  $\delta = 0.68 \text{ mm s}^{-1}$ ,  $|\Delta E_Q| = 0.96 \text{ mm s}^{-1}$ ; light blue doublet ( $\eta^1$  ( $S = 1$ ), 37%):  $\delta = 0.55 \text{ mm s}^{-1}$ ,  $|\Delta E_Q| = 1.28 \text{ mm s}^{-1}$ ; light green doublet ( $\eta^2$  ( $S = 2$ ), 9%):  $\delta = 0.98 \text{ mm s}^{-1}$ ,  $|\Delta E_Q| = 1.45 \text{ mm s}^{-1}$ . See Table S12 caption below for details regarding component assignment and fitting constraints.

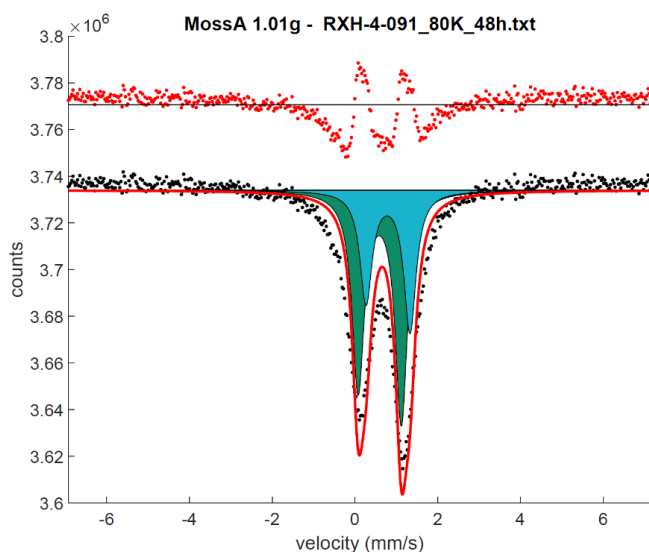

**Figure S22:** The same experimental data as S21 for **10** but with an alternative two-component fit. Fit parameters: light blue doublet ( $\eta^1$  ( $S = 2$ ), 63%):  $\delta = 0.60 \text{ mm s}^{-1}$ ,  $|\Delta E_Q| = 1.04 \text{ mm s}^{-1}$ ; dark green doublet ( $\eta^2$  ( $S = 2$ ), 37%):  $\delta = 0.80 \text{ mm s}^{-1}$ ,  $|\Delta E_Q| = 1.06 \text{ mm s}^{-1}$ .

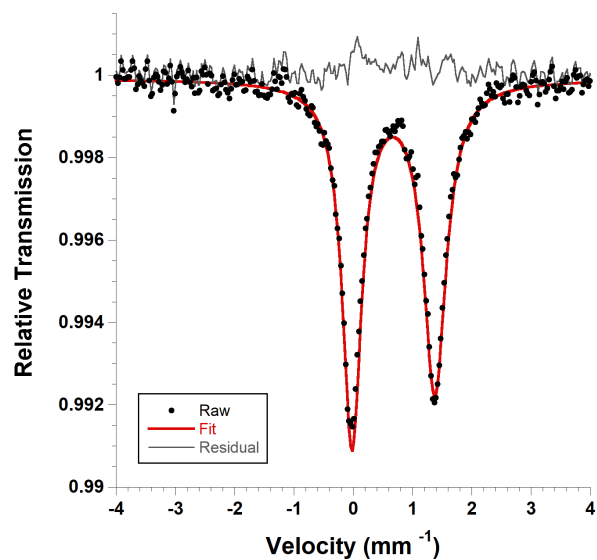

**Figure S23.** Zero-field Mössbauer spectrum of  $\text{LFeN(Ph)N(Me}_2\text{Si(CH}_2\text{)}_2\text{SiMe}_2\text{)}$  (**12**) where the black circles are the data, the red line is a one-component simulation with parameters  $\delta = 0.68 \text{ mm s}^{-1}$ ,  $|\Delta E_Q| = 1.40 \text{ mm s}^{-1}$ ,  $\Gamma_L = 0.40 \text{ mm s}^{-1}$ ,  $\Gamma_R = 0.46 \text{ mm s}^{-1}$ , and the gray line is the residual.

## IR Spectroscopy

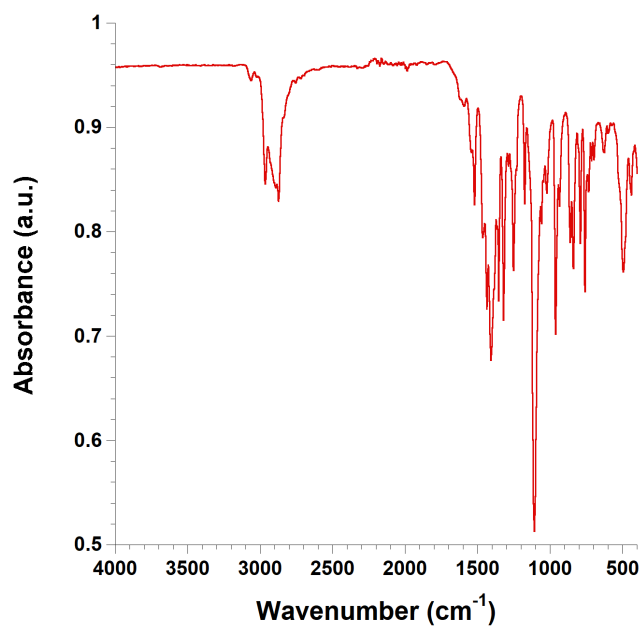

Figure S24. IR spectrum of solid [K(18-crown-6)(THF)<sub>2</sub>][LFeCH<sub>2</sub>SiMe<sub>3</sub>] (**5a**).

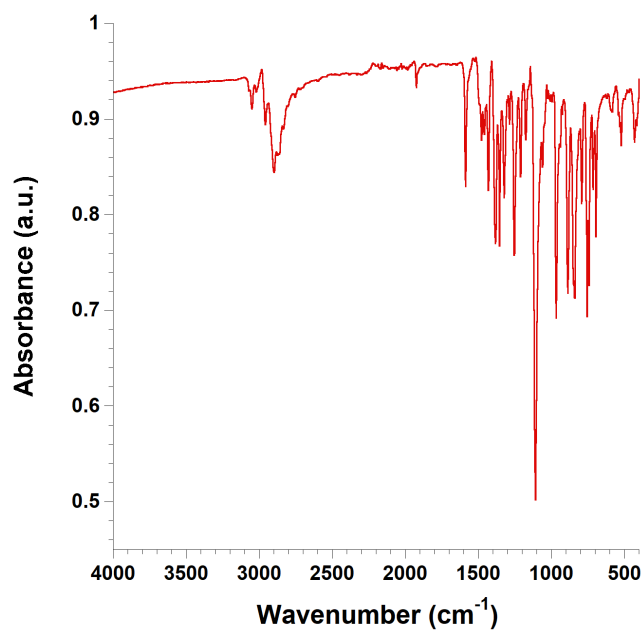

Figure S25. IR spectrum of solid [K(18-crown-6)(THF)<sub>2</sub>][LFeBn] (**5b**).

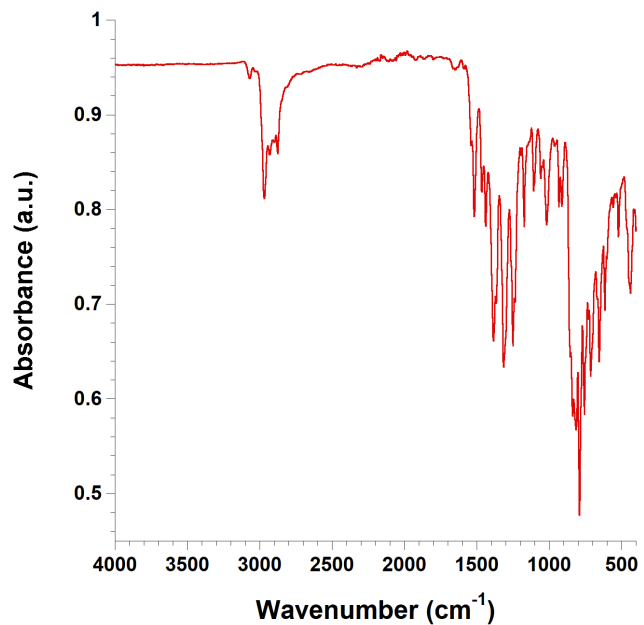

**Figure S26.** IR spectrum of solid  $\text{LFe}(\text{CH}_2\text{SiMe}_3)\text{NN}(\text{Me}_2\text{Si}(\text{CH}_2)_2\text{SiMe}_2)$  (**7a**).

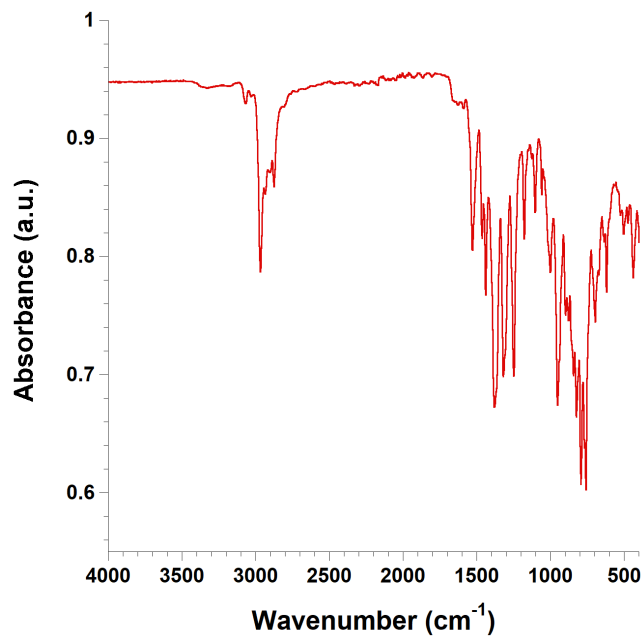

**Figure S27.** IR spectrum of solid  $\text{LFeNN}(\text{Me}_2\text{Si}(\text{CH}_2)_2\text{SiMe}_2)$  (**8**).

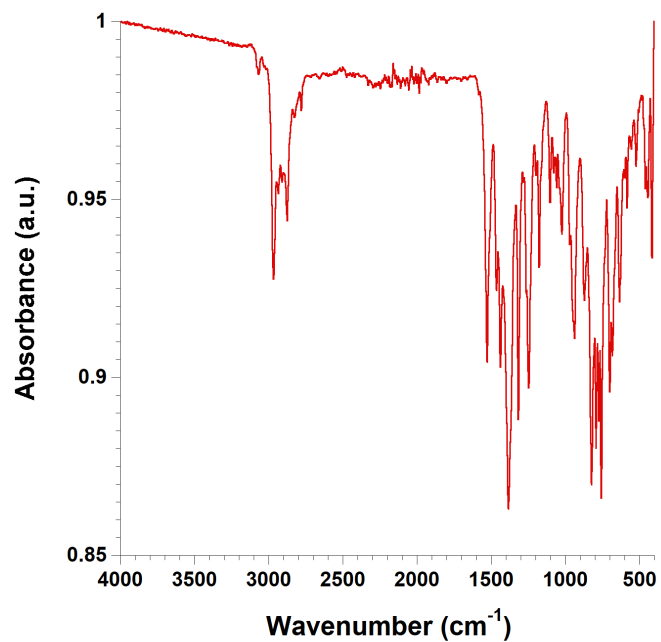

**Figure S28.** IR spectrum of solid LFeN(Me<sub>2</sub>Si(CH<sub>2</sub>)<sub>2</sub>SiMe<sub>2</sub>)NMe (**10**).

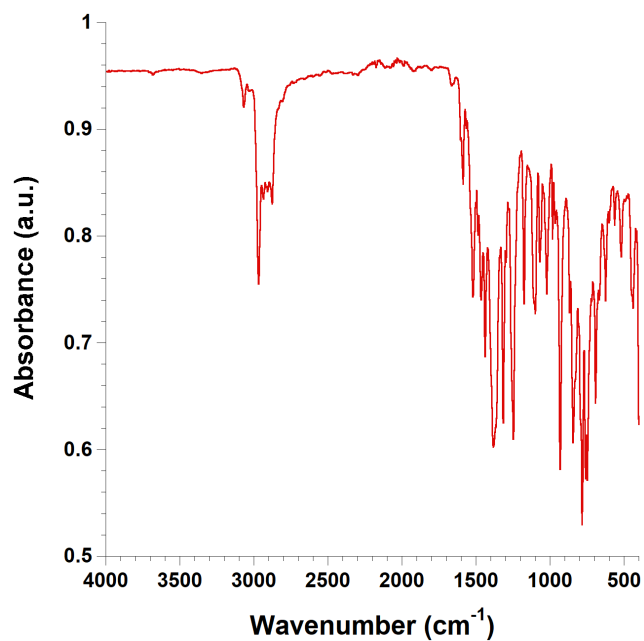

**Figure S29.** IR spectrum of solid LFeN(Ph)N(Me<sub>2</sub>Si(CH<sub>2</sub>)<sub>2</sub>SiMe<sub>2</sub>) (**12**).

## UV-Visible Spectroscopy

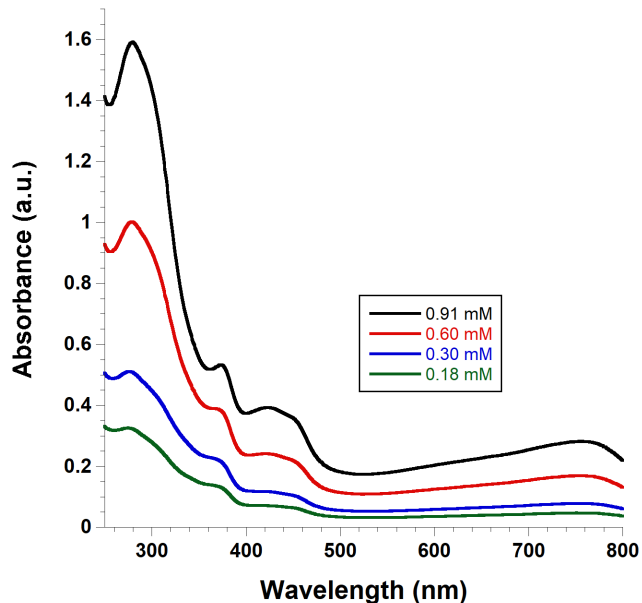

**Figure S30.** UV-visible spectra of  $[\text{K}(18\text{-crown-6})(\text{THF})_2][\text{LFeCH}_2\text{SiMe}_3]$  (**5a**) in THF solution with concentrations ranging from 0.91 to 0.18 mM.

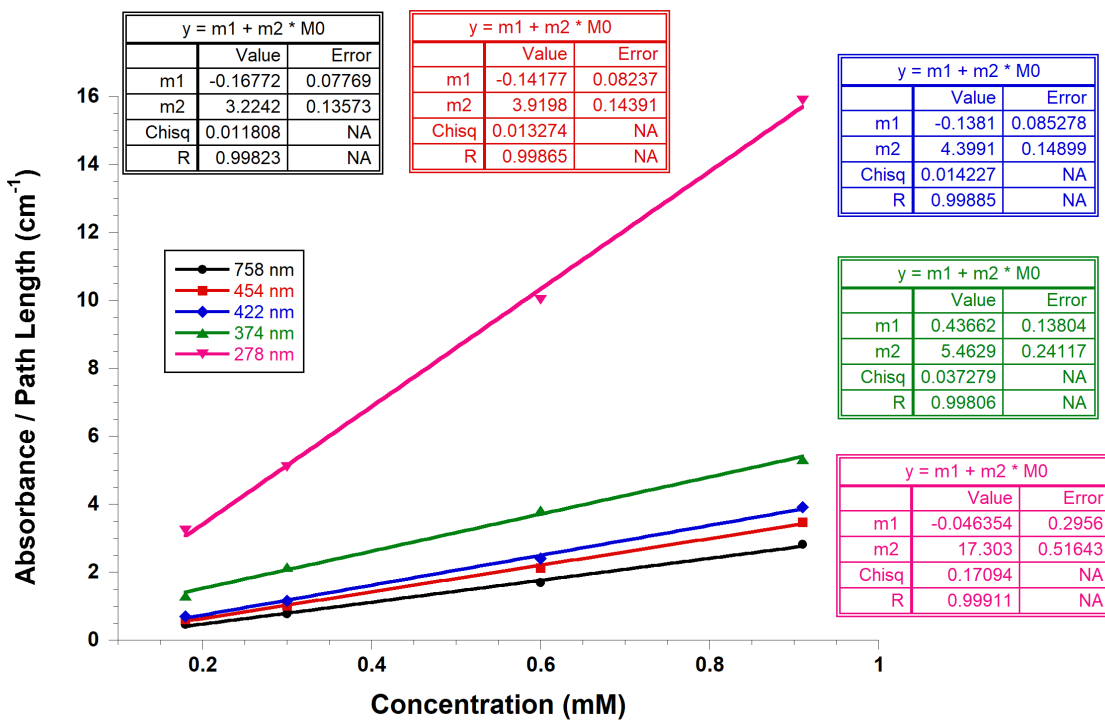

**Figure S31.** Beer-Lambert Law plot of selected UV-vis spectral features for  $[\text{K}(18\text{-crown-6})(\text{THF})_2][\text{LFeCH}_2\text{SiMe}_3]$  (**5a**) in THF solutions (0.91-0.18 mM). Trendline equations are in the boxes around the plot.



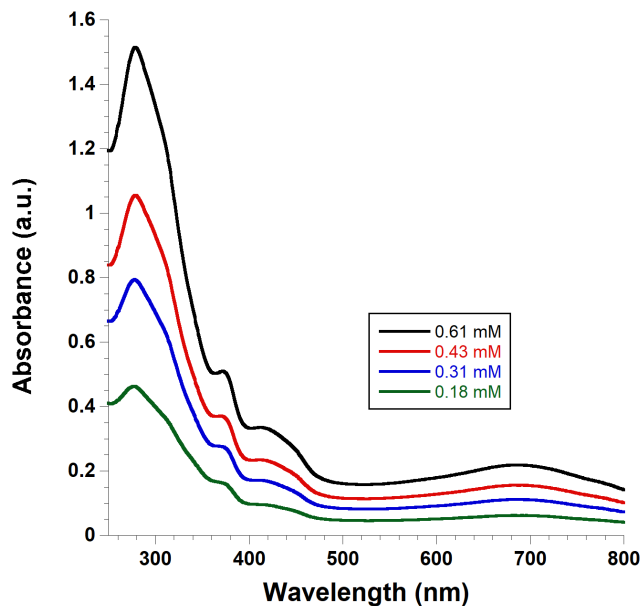

**Figure S32.** UV-visible spectra of [K(18-crown-6)(THF)<sub>2</sub>][LFeBn] (**5b**) in THF solution with concentrations ranging from 0.61 to 0.18 mM.

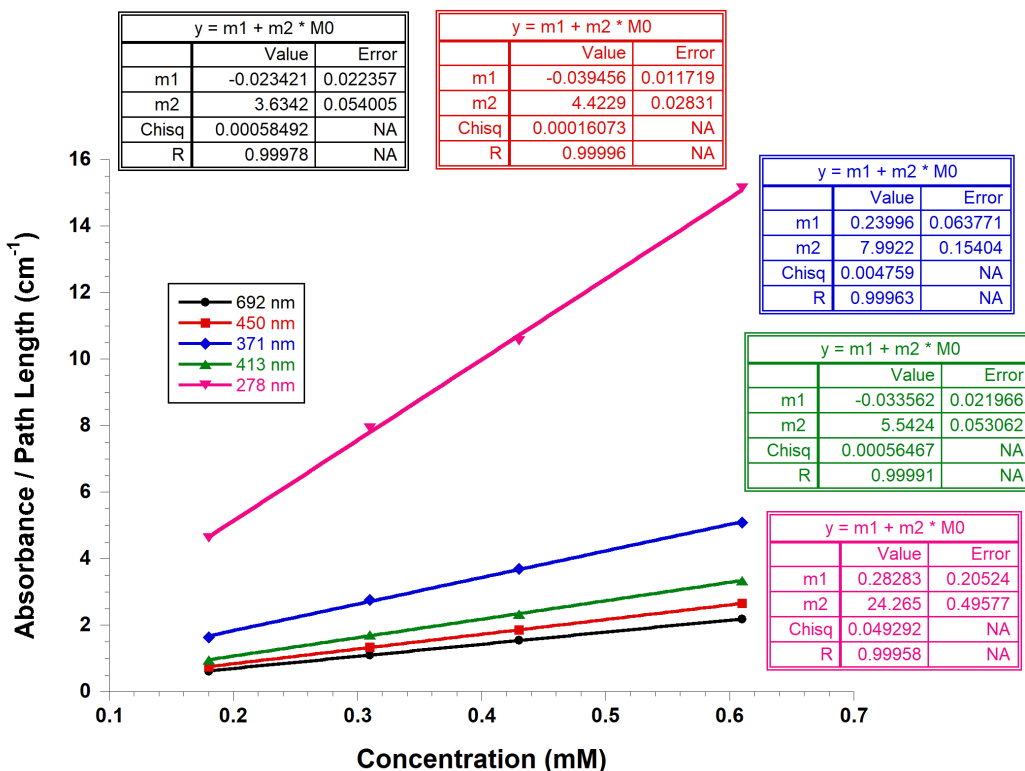

**Figure S33.** Beer-Lambert Law plot of selected UV-vis spectral features for [K(18-crown-6)(THF)<sub>2</sub>][LFeBn] (**5b**) in THF solutions (0.61-0.18 mM). Trendline equations are in the boxes around the plot.

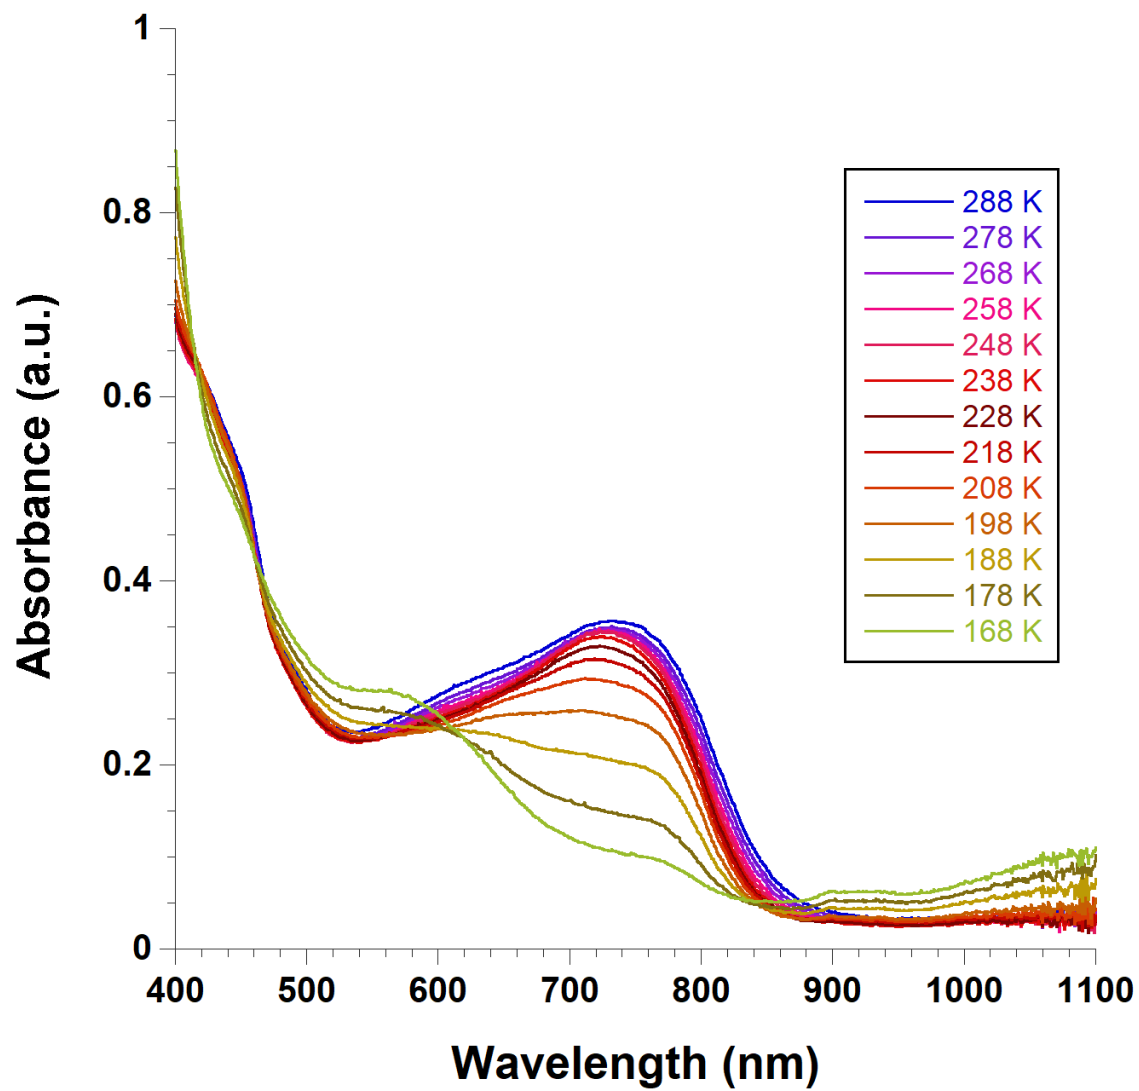

**Figure S34.** Variable-temperature UV-vis spectrum of [K(18-crown-6)(tol)][LFeMe] (**5c**) in THF under an atmosphere of N<sub>2</sub>. Concentration = 0.192 mM.

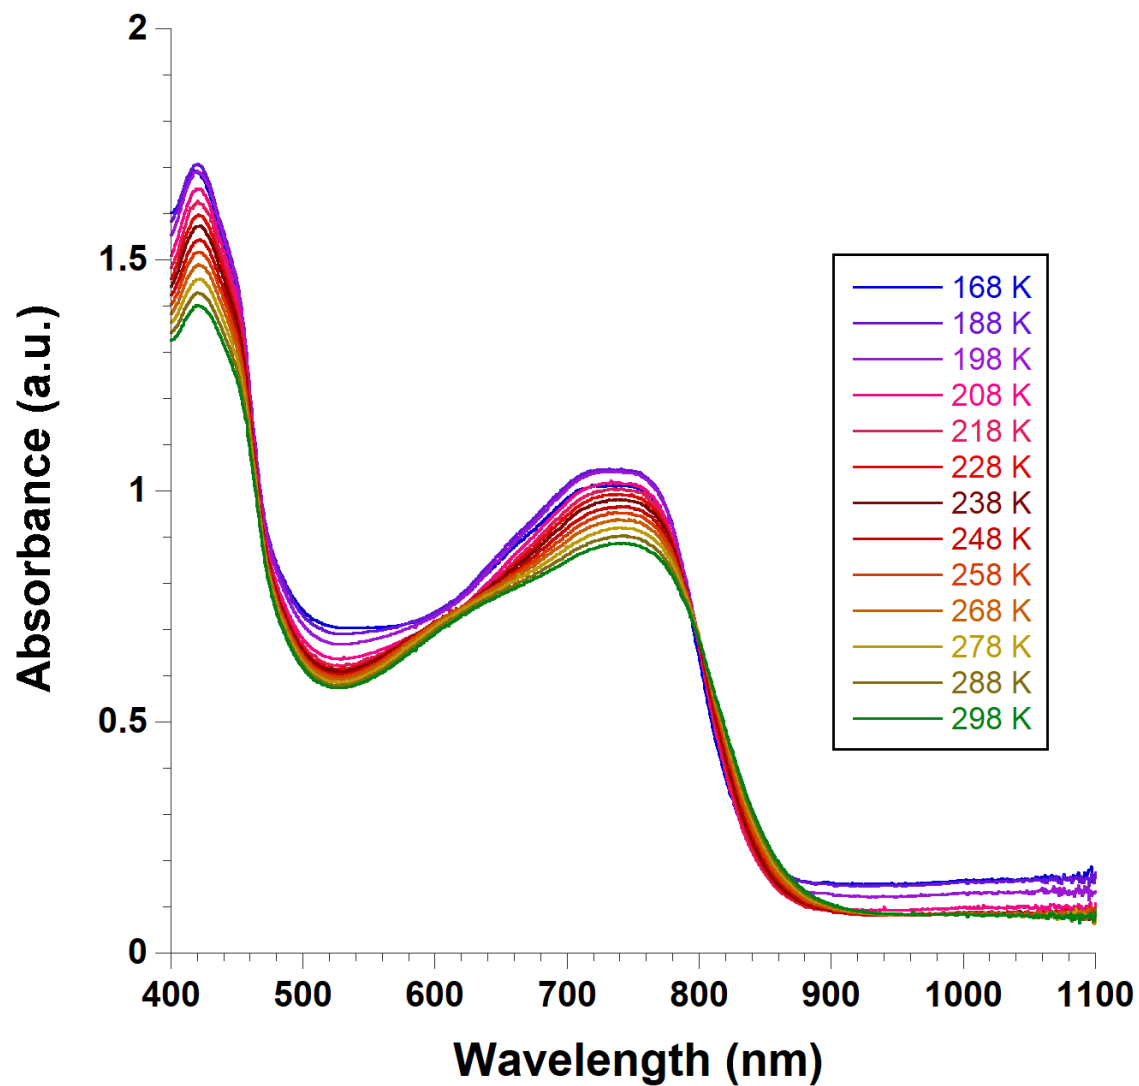

**Figure S35.** Variable-temperature UV-vis spectrum of [K(18-crown-6)(tol)][LFeMe] (**5c**) in THF under an atmosphere of Ar. Concentration = 0.351 mM.

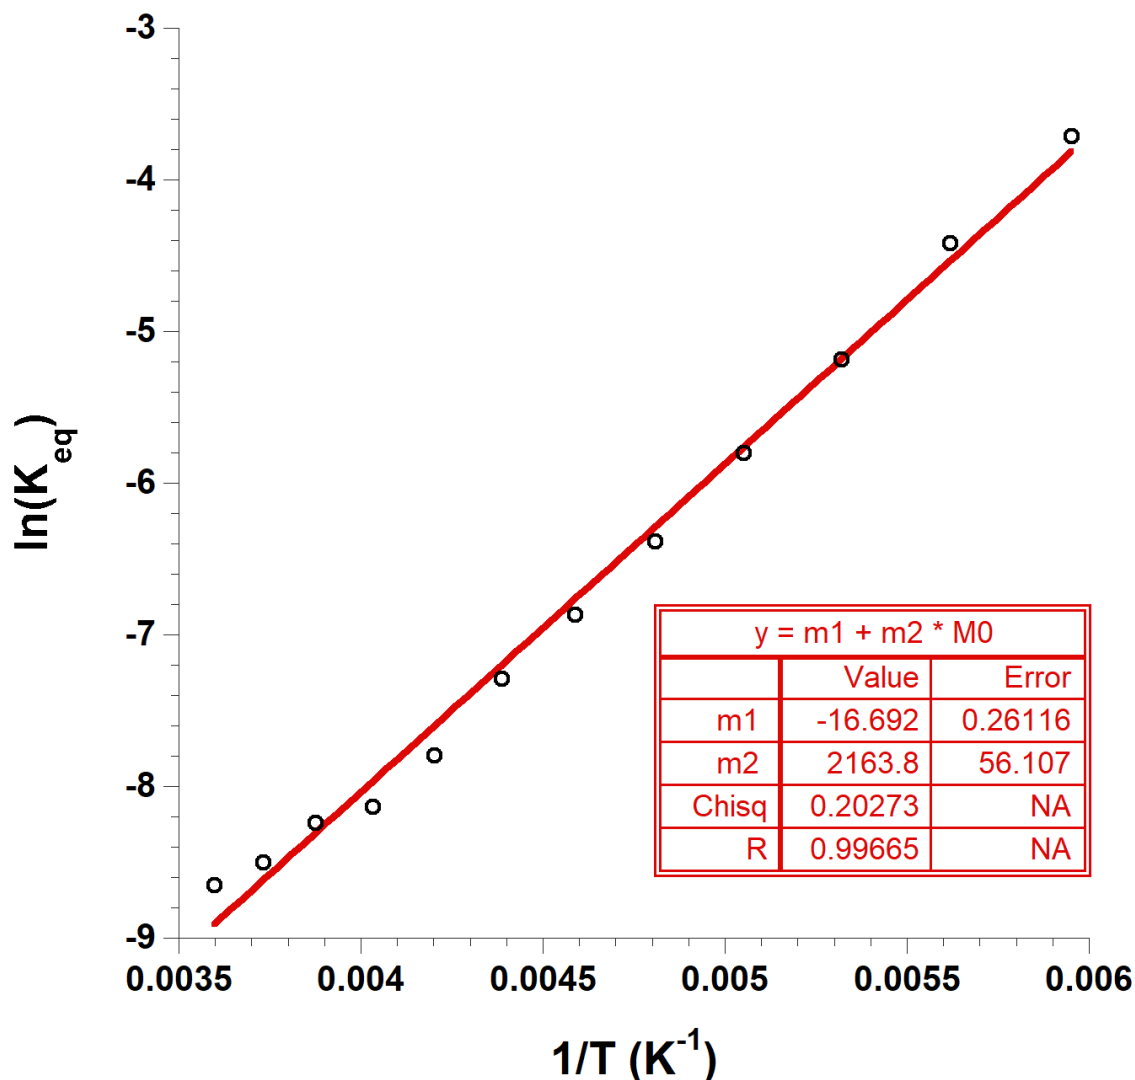

**Figure S36.** Van't Hoff plot for  $N_2$  binding to  $[K(18\text{-crown-6})(\text{tol})][LFeMe]$  (**5c**) to form  $[K(18\text{-crown-6})][LFe(N_2)Me]$  (**5c-N<sub>2</sub>**) with points fit to a linear function. The solution concentration of  $N_2$  was calculated using a literature equation,<sup>11</sup> additionally accounting for the pressure changes with temperature in the closed system. Equilibrium constants were calculated from the absorbance change at 731 nm in the UV-vis spectra in Fig. S28. The concentration of **5c** was assumed to account for the majority of the absorbance at this wavelength at 288 K and the decrease in absorbance was attributed to formation of **5c-N<sub>2</sub>**. Conversion to **5c-N<sub>2</sub>** was incomplete even at 168 K, so it was necessary to estimate its absorbance at 731 nm as 0.05. The wide uncertainty values given in the text are chosen to generously account for this potential source of error.

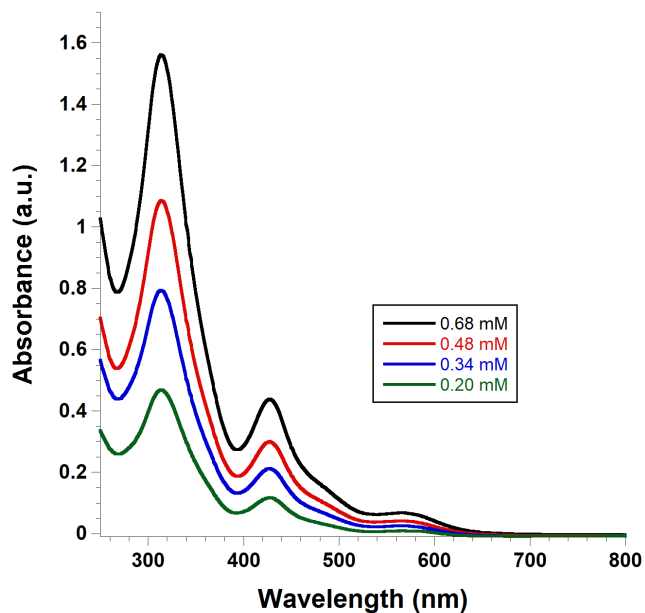

**Figure S37.** UV-visible spectra of  $\text{LFe}(\text{CH}_2\text{SiMe}_3)\text{NN}(\text{Me}_2\text{Si}(\text{CH}_2)_2\text{SiMe}_2)$  (**7a**) in hexanes solution with concentrations ranging from 0.68 to 0.20 mM.

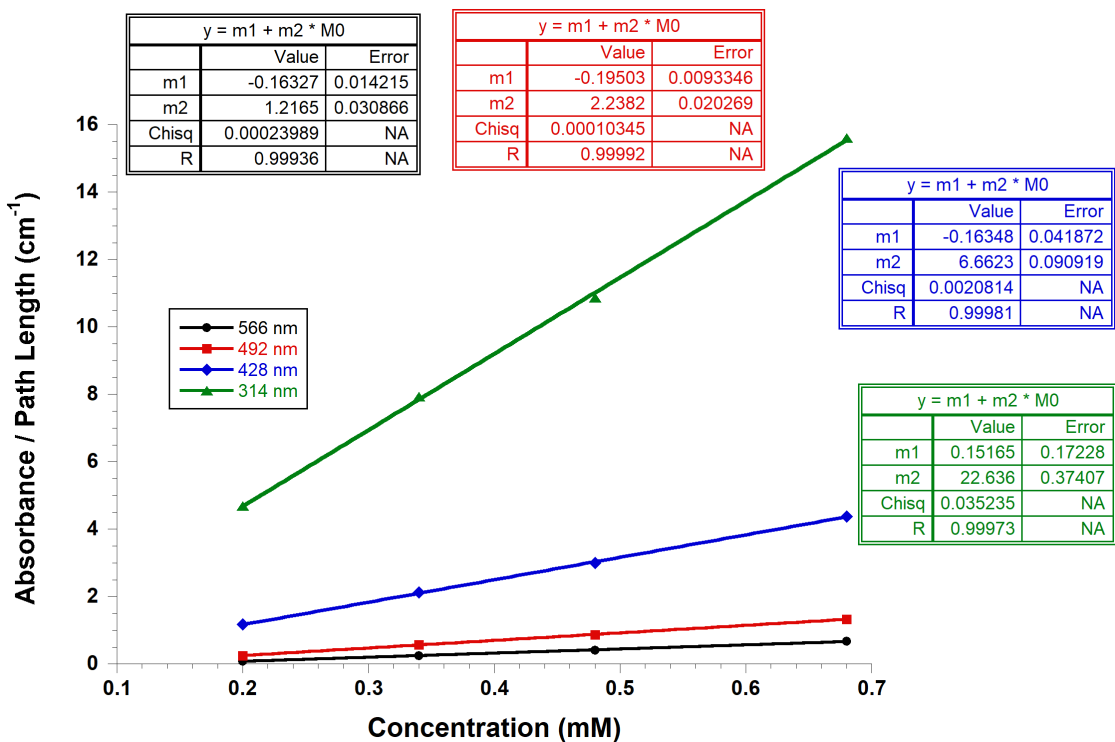

**Figure S38.** Beer-Lambert Law plot of selected UV-vis spectral features for  $\text{LFe}(\text{CH}_2\text{SiMe}_3)\text{NN}(\text{Me}_2\text{Si}(\text{CH}_2)_2\text{SiMe}_2)$  (**7a**) in hexanes solutions (0.68-0.20 mM). Trendline equations are in the boxes around the plot.

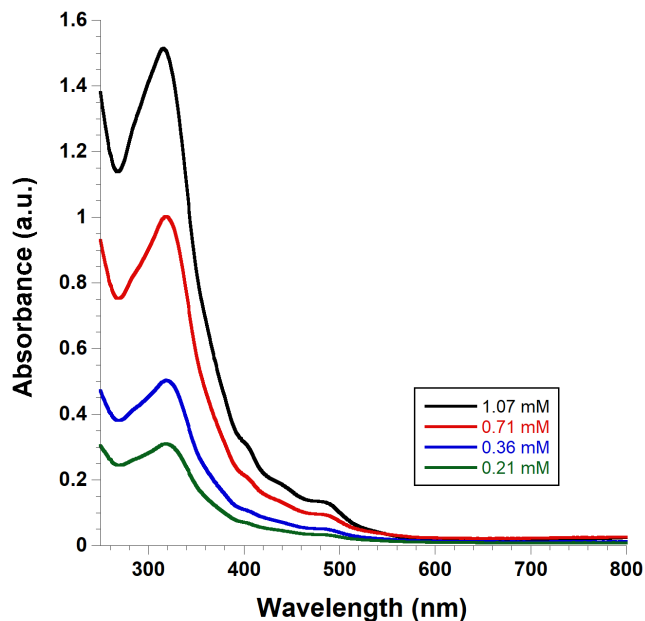

**Figure S39.** UV-visible spectra of LFeNN(Me<sub>2</sub>Si(CH<sub>2</sub>)<sub>2</sub>SiMe<sub>2</sub>) (**8**) in hexanes solution with concentrations ranging from 1.07 to 0.21 mM.

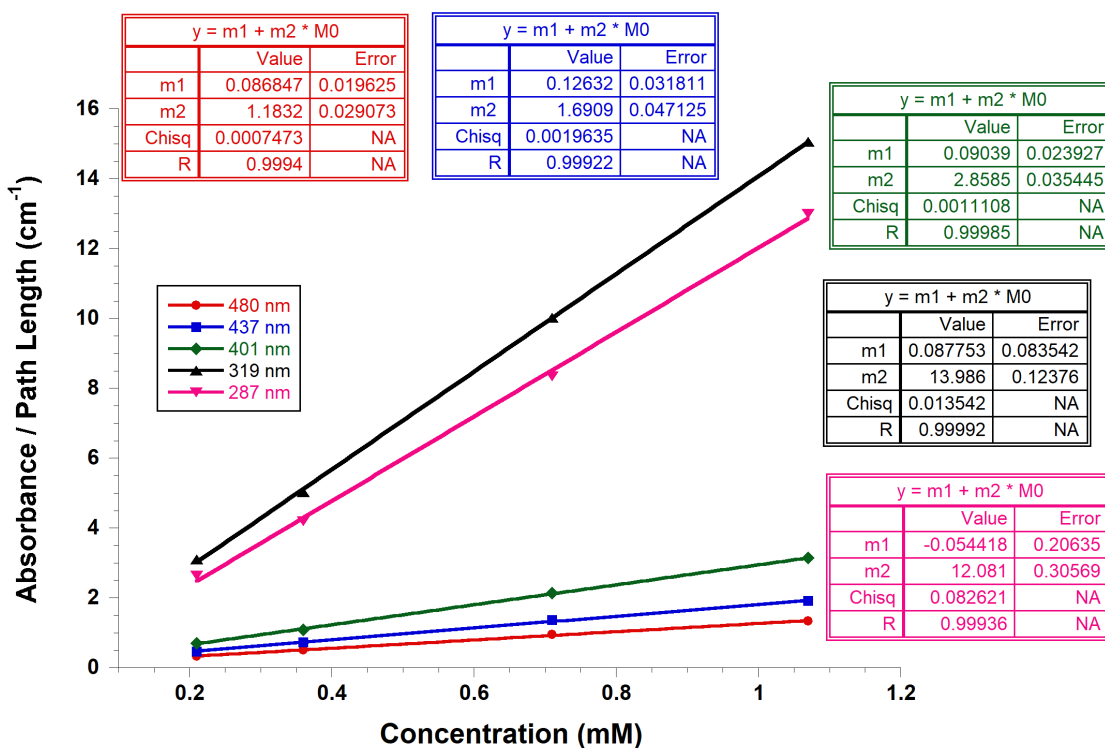

**Figure S40.** Beer-Lambert Law plot of selected UV-vis spectral features for LFeNN(Me<sub>2</sub>Si(CH<sub>2</sub>)<sub>2</sub>SiMe<sub>2</sub>) (**8**) in hexanes solutions (1.07-0.21 mM). Trendline equations are in the boxes around the plot.

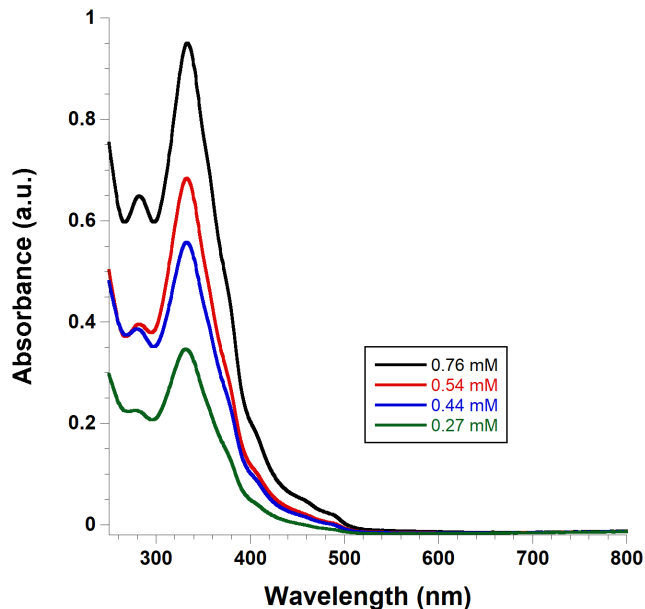

**Figure S50.** UV-visible spectra of LFeN(Me<sub>2</sub>Si(CH<sub>2</sub>)<sub>2</sub>SiMe<sub>2</sub>)Me (**10**) in hexanes solution with concentrations ranging from 0.76 to 0.27 mM.

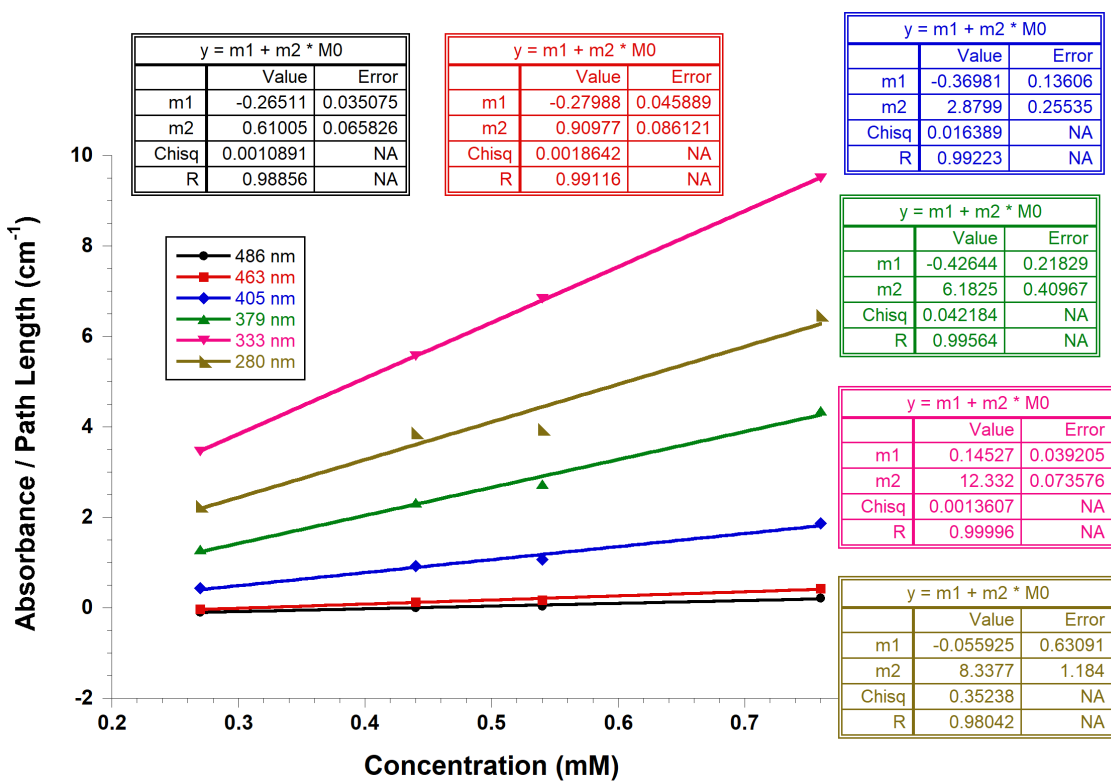

**Figure S51.** Beer-Lambert Law plot of selected UV-vis spectral features for LFeN(Me<sub>2</sub>Si(CH<sub>2</sub>)<sub>2</sub>SiMe<sub>2</sub>)Me (**10**) in hexanes solutions (0.76-0.27 mM). Trendline equations are in the boxes around the plot.

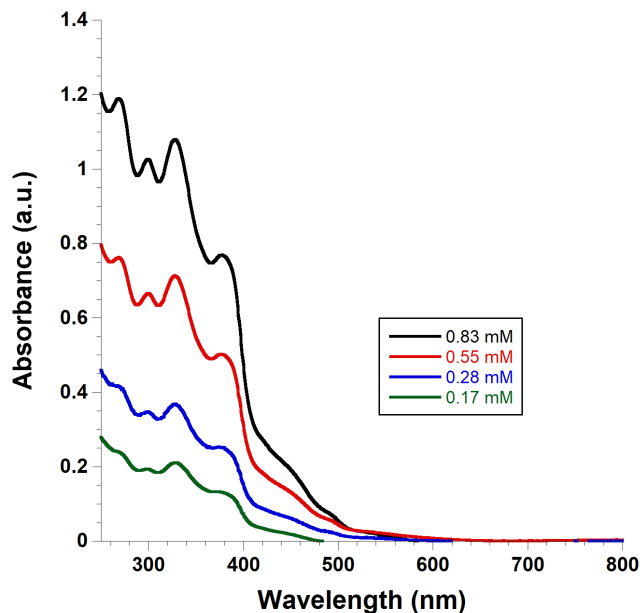

**Figure S52.** UV-visible spectra of LFeN(Ph)N(Me<sub>2</sub>Si(CH<sub>2</sub>)<sub>2</sub>SiMe<sub>2</sub>) (**12**) in hexanes solution with concentrations ranging from 0.83 to 0.17 mM.

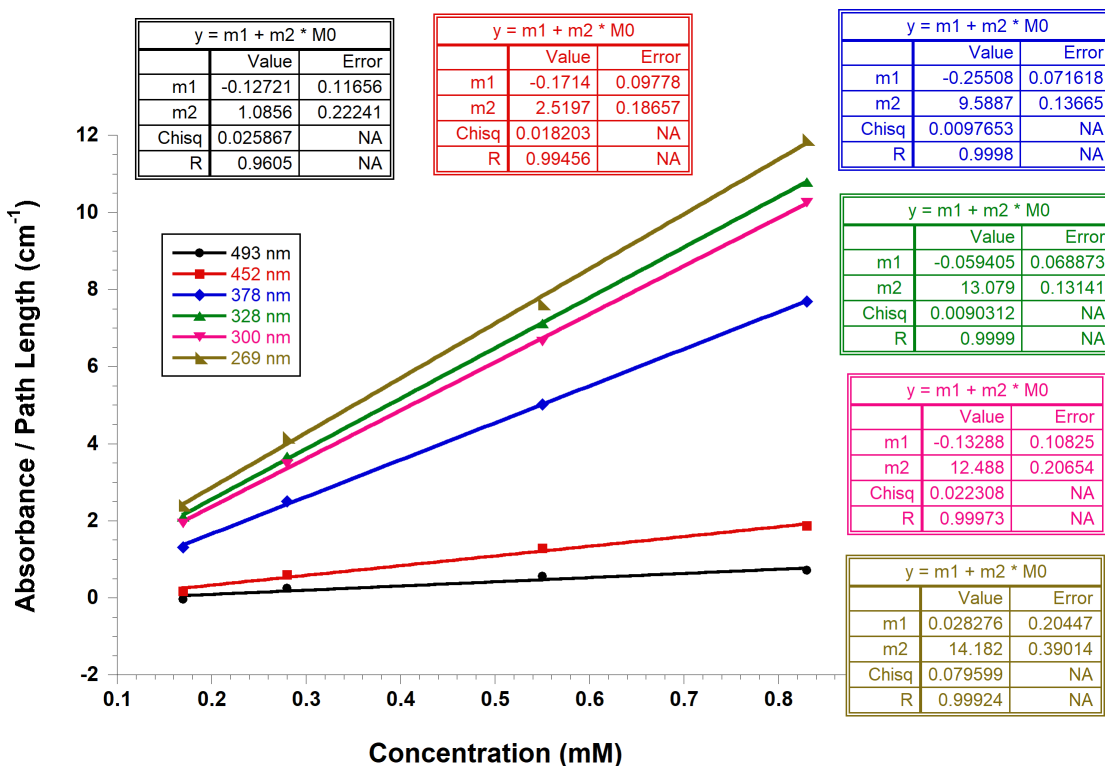

**Figure S53.** Beer-Lambert Law plot of selected UV-vis spectral features for LFeN(Ph)N(Me<sub>2</sub>Si(CH<sub>2</sub>)<sub>2</sub>SiMe<sub>2</sub>) (**12**) in hexanes solutions (0.83-0.17 mM). Trendline equations are in the boxes around the plot.



## Crystallography

### [K(18-crown-6)(THF)<sub>2</sub>][LFeCH<sub>2</sub>SiMe<sub>3</sub>] (**5a**)

Low-temperature diffraction data ( $\omega$ -scans) were collected on a Rigaku SCX Mini diffractometer coupled to a Rigaku Mercury275R CCD with Mo K $\alpha$  radiation ( $\lambda = 0.71073 \text{ \AA}$ ) for the structure of **5a**. The diffraction images were processed and scaled using Rigaku Oxford Diffraction software (CrysAlisPro; Rigaku OD: The Woodlands, TX, 2015). The structure was solved with SHELXT and was refined against  $F^2$  on all data by full-matrix least squares with SHELXL.<sup>12</sup> All non-hydrogen atoms were refined anisotropically. Hydrogen atoms were included in the model at geometrically calculated positions and refined using a riding model. The isotropic displacement parameters of all hydrogen atoms were fixed to 1.2 times the U value of the atoms to which they are linked (1.5 times for methyl groups). The full numbering scheme of compound **5a** can be found in the full details of the X-ray structure determination (CIF), which is included as Supporting Information. CCDC number 2226338 contains the supplementary crystallographic data for this paper. These data can be obtained free of charge from The Cambridge Crystallographic Data Center via [www.ccdc.cam.ac.uk/data\\_request/cif](http://www.ccdc.cam.ac.uk/data_request/cif).

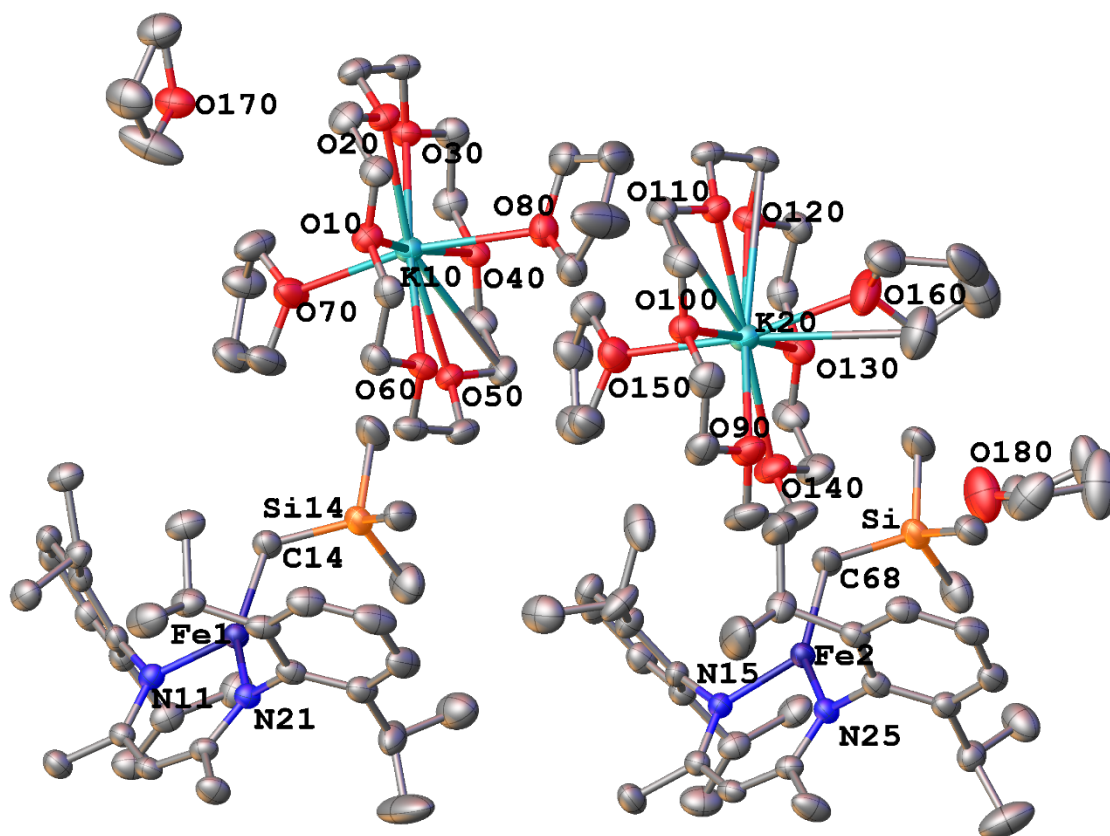

**Figure S54.** A partial numbering scheme of **5a** with 50% thermal ellipsoid probability levels. The hydrogen atoms are omitted for clarity.

Table S1. Crystal data and structure refinement for **5a**.

|                                   |                                                                        |                  |
|-----------------------------------|------------------------------------------------------------------------|------------------|
| Identification code               | mini-21065                                                             |                  |
| CCDC Number                       | 2226338                                                                |                  |
| Empirical formula                 | C <sub>57</sub> H <sub>100</sub> Fe K N <sub>2</sub> O <sub>9</sub> Si |                  |
| Formula weight                    | 1080.42                                                                |                  |
| Temperature                       | 93(2) K                                                                |                  |
| Wavelength                        | 0.71073 Å                                                              |                  |
| Crystal system                    | Monoclinic                                                             |                  |
| Space group                       | P2 <sub>1</sub> /n                                                     |                  |
| Unit cell dimensions              | a = 24.2280(7) Å                                                       | α = 90°.         |
|                                   | b = 19.8535(4) Å                                                       | β = 114.199(4)°. |
|                                   | c = 27.1355(9) Å                                                       | γ = 90°.         |
| Volume                            | 11905.5(7) Å <sup>3</sup>                                              |                  |
| Z                                 | 8                                                                      |                  |
| Density (calculated)              | 1.206 g/cm <sup>3</sup>                                                |                  |
| Absorption coefficient            | 0.396 mm <sup>-1</sup>                                                 |                  |
| F(000)                            | 4696                                                                   |                  |
| Crystal size                      | 0.200 x 0.200 x 0.100 mm <sup>3</sup>                                  |                  |
| Crystal color and habit           | Black Plate                                                            |                  |
| Diffractometer                    | Rigaku Mercury275R CCD                                                 |                  |
| Theta range for data collection   | 2.740 to 26.372°.                                                      |                  |
| Index ranges                      | -30 ≤ h ≤ 30, -24 ≤ k ≤ 24, -33 ≤ l ≤ 33                               |                  |
| Reflections collected             | 189898                                                                 |                  |
| Independent reflections           | 24308 [R(int) = 0.0713]                                                |                  |
| Observed reflections (I > 2σ(I))  | 20016                                                                  |                  |
| Completeness to theta = 25.242°   | 99.9 %                                                                 |                  |
| Absorption correction             | Semi-empirical from equivalents                                        |                  |
| Max. and min. transmission        | 1.00000 and 0.84720                                                    |                  |
| Solution method                   | SHELXT-2014/5 (Sheldrick, 2014)                                        |                  |
| Refinement method                 | SHELXL-2014/7 (Sheldrick, 2014)                                        |                  |
| Data / restraints / parameters    | 24308 / 0 / 1305                                                       |                  |
| Goodness-of-fit on F <sup>2</sup> | 1.107                                                                  |                  |
| Final R indices [I > 2σ(I)]       | R1 = 0.0725, wR2 = 0.1680                                              |                  |
| R indices (all data)              | R1 = 0.0889, wR2 = 0.1809                                              |                  |
| Largest diff. peak and hole       | 0.967 and -0.597 e.Å <sup>-3</sup>                                     |                  |

**[K(18-crown-6)(THF)<sub>2</sub>][LFeBn] (5b)**

Low-temperature diffraction data ( $\omega$ -scans) were collected on a Rigaku MicroMax-007HF diffractometer coupled to a Saturn994+ CCD detector with Cu K $\alpha$  ( $\lambda = 1.54178 \text{ \AA}$ ). The diffraction images were processed and scaled using Rigaku Oxford Diffraction software (CrysAlisPro; Rigaku OD: The Woodlands, TX, 2015). The structure was solved with SHELXT and was refined against  $F^2$  on all data by full-matrix least squares with SHELXL.<sup>12</sup> All non-hydrogen atoms were refined anisotropically. Hydrogen atoms were included in the model at geometrically calculated positions and refined using a riding model. The isotropic displacement parameters of all hydrogen atoms were fixed to 1.2 times the  $U$  value of the atoms to which they are linked (1.5 times for methyl groups). CCDC number 2226339 contains the supplementary crystallographic data for this paper.

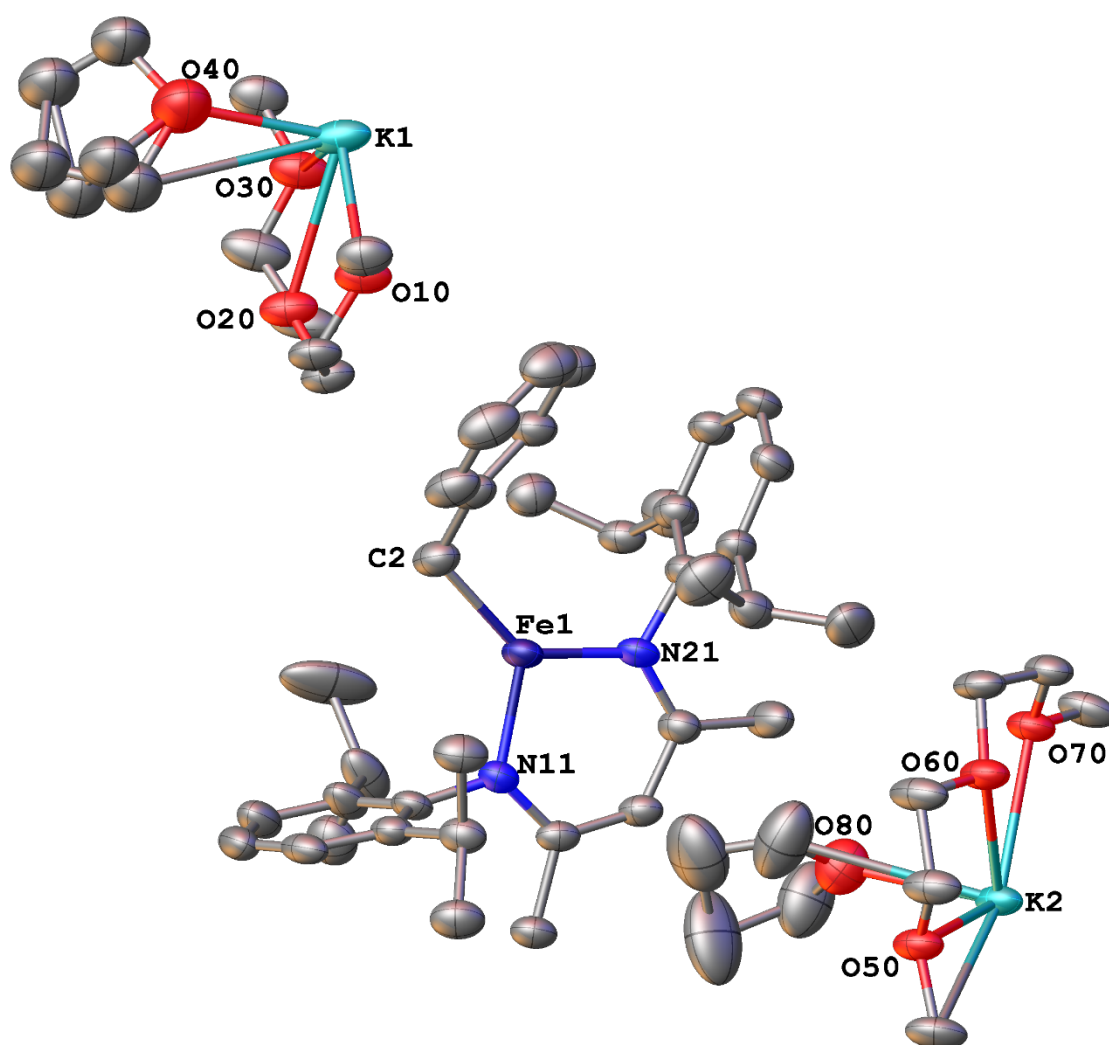

**Figure S55.** A partial numbering scheme of **5b** with 50% thermal ellipsoid probability levels. The hydrogen atoms are omitted for clarity. The potassium ions lie on crystallographic inversion centers.

Table S2. Crystal data and structure refinement for **5b**.

|                                   |                                                                    |                 |
|-----------------------------------|--------------------------------------------------------------------|-----------------|
| Identification code               | 007a-21112                                                         |                 |
| CCDC Number                       | 2226339                                                            |                 |
| Empirical formula                 | C <sub>56</sub> H <sub>88</sub> Fe K N <sub>2</sub> O <sub>8</sub> |                 |
| Formula weight                    | 1012.23                                                            |                 |
| Temperature                       | 93(2) K                                                            |                 |
| Wavelength                        | 1.54184 Å                                                          |                 |
| Crystal system                    | Triclinic                                                          |                 |
| Space group                       | P-1                                                                |                 |
| Unit cell dimensions              | a = 13.0503(6) Å                                                   | α = 83.732(3)°. |
|                                   | b = 13.4395(6) Å                                                   | β = 71.934(4)°. |
|                                   | c = 20.4096(7) Å                                                   | γ = 66.707(4)°. |
| Volume                            | 3125.4(3) Å <sup>3</sup>                                           |                 |
| Z                                 | 2                                                                  |                 |
| Density (calculated)              | 1.076 g/cm <sup>3</sup>                                            |                 |
| Absorption coefficient            | 2.897 mm <sup>-1</sup>                                             |                 |
| F(000)                            | 1094                                                               |                 |
| Crystal size                      | 0.200 x 0.200 x 0.100 mm <sup>3</sup>                              |                 |
| Crystal color and habit           | Black Plate                                                        |                 |
| Diffractometer                    | Rigaku Saturn 944+ CCD                                             |                 |
| Theta range for data collection   | 2.277 to 66.559°.                                                  |                 |
| Index ranges                      | -15 ≤ h ≤ 15, -15 ≤ k ≤ 15, -24 ≤ l ≤ 24                           |                 |
| Reflections collected             | 112250                                                             |                 |
| Independent reflections           | 10888 [R(int) = 0.0757]                                            |                 |
| Observed reflections (I > 2σ(I))  | 8540                                                               |                 |
| Completeness to theta = 66.559°   | 98.6 %                                                             |                 |
| Absorption correction             | Semi-empirical from equivalents                                    |                 |
| Max. and min. transmission        | 1.00000 and 0.75467                                                |                 |
| Solution method                   | SHELXT-2014/5 (Sheldrick, 2014)                                    |                 |
| Refinement method                 | SHELXL-2014/7 (Sheldrick, 2014)                                    |                 |
| Data / restraints / parameters    | 10888 / 75 / 645                                                   |                 |
| Goodness-of-fit on F <sup>2</sup> | 1.045                                                              |                 |
| Final R indices [I > 2σ(I)]       | R1 = 0.0734, wR2 = 0.1986                                          |                 |
| R indices (all data)              | R1 = 0.0901, wR2 = 0.2118                                          |                 |
| Largest diff. peak and hole       | 1.585 and -0.710 e.Å <sup>-3</sup>                                 |                 |

### **LFe(CH<sub>2</sub>SiMe<sub>3</sub>)NN(Me<sub>2</sub>Si(CH<sub>2</sub>)<sub>2</sub>SiMe<sub>2</sub>) (7a)**

Low-temperature diffraction data ( $\omega$ -scans) were collected on a Rigaku MicroMax-007HF diffractometer coupled to a Saturn994+ CCD detector with Cu K $\alpha$  ( $\lambda = 1.54178 \text{ \AA}$ ). The diffraction images were processed and scaled using Rigaku Oxford Diffraction software (CrysAlisPro; Rigaku OD: The Woodlands, TX, 2015). The structure was solved with SHELXT and was refined against  $F^2$  on all data by full-matrix least squares with SHELXL.<sup>12</sup> All non-hydrogen atoms were refined anisotropically. Hydrogen atoms were included in the model at geometrically calculated positions and refined using a riding model. The isotropic displacement parameters of all hydrogen atoms were fixed to 1.2 times the  $U$  value of the atoms to which they are linked (1.5 times for methyl groups). The program SQUEEZE<sup>13</sup> was used to compensate for the contribution of disordered solvents contained in voids within the crystal lattice from the diffraction intensities. This procedure was applied to the data file and the submitted model is based on the solvent removed data. Based on the total electron density found in the voids ( $47 \text{ e/\AA}^3$ ), it is likely that a hexane molecule is present in the unit cell. See "\_platon\_squeeze\_details" in this .cif for more information. CCDC number 2226340 contains the supplementary crystallographic data for this paper.

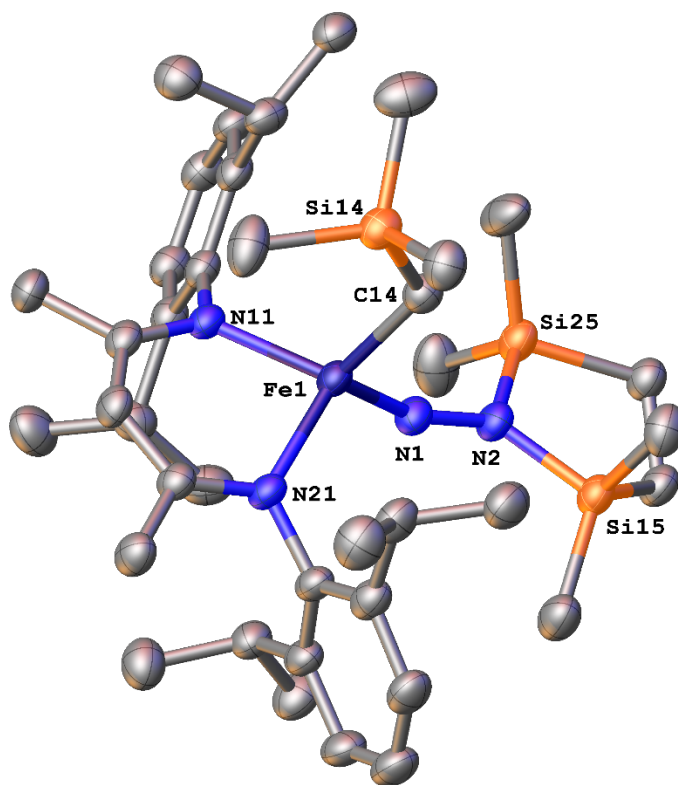

**Figure S56.** A partial numbering scheme of **7a** with 50% thermal ellipsoid probability levels. The hydrogen atoms are omitted for clarity.

Table S3. Crystal data and structure refinement for **7a**.

|                                   |                                                                   |                 |
|-----------------------------------|-------------------------------------------------------------------|-----------------|
| Identification code               | 007a-22088                                                        |                 |
| CCDC Number                       | 2226340                                                           |                 |
| Empirical formula                 | C <sub>39</sub> H <sub>68</sub> Fe N <sub>4</sub> Si <sub>3</sub> |                 |
| Formula weight                    | 733.09                                                            |                 |
| Temperature                       | 93(2) K                                                           |                 |
| Wavelength                        | 1.54184 Å                                                         |                 |
| Crystal system                    | Triclinic                                                         |                 |
| Space group                       | P-1                                                               |                 |
| Unit cell dimensions              | a = 10.3800(4) Å                                                  | α = 76.000(3)°. |
|                                   | b = 11.5329(4) Å                                                  | β = 82.547(3)°. |
|                                   | c = 20.2705(6) Å                                                  | γ = 72.992(3)°. |
| Volume                            | 2247.01(14) Å <sup>3</sup>                                        |                 |
| Z                                 | 2                                                                 |                 |
| Density (calculated)              | 1.084 g/cm <sup>3</sup>                                           |                 |
| Absorption coefficient            | 3.663 mm <sup>-1</sup>                                            |                 |
| F(000)                            | 796                                                               |                 |
| Crystal size                      | 0.200 x 0.200 x 0.100 mm <sup>3</sup>                             |                 |
| Crystal color and habit           | Black Plate                                                       |                 |
| Diffractometer                    | Rigaku Saturn 944+ CCD                                            |                 |
| Theta range for data collection   | 2.251 to 66.600°.                                                 |                 |
| Index ranges                      | -12 ≤ h ≤ 12, -13 ≤ k ≤ 13, -24 ≤ l ≤ 23                          |                 |
| Reflections collected             | 66616                                                             |                 |
| Independent reflections           | 7797 [R(int) = 0.0490]                                            |                 |
| Observed reflections (I > 2σ(I))  | 7241                                                              |                 |
| Completeness to theta = 66.600°   | 98.0 %                                                            |                 |
| Absorption correction             | Semi-empirical from equivalents                                   |                 |
| Max. and min. transmission        | 1.00000 and 0.61604                                               |                 |
| Solution method                   | SHELXT-2014/5 (Sheldrick, 2014)                                   |                 |
| Refinement method                 | SHELXL-2014/7 (Sheldrick, 2014)                                   |                 |
| Data / restraints / parameters    | 7797 / 0 / 441                                                    |                 |
| Goodness-of-fit on F <sup>2</sup> | 1.051                                                             |                 |
| Final R indices [I > 2σ(I)]       | R1 = 0.0455, wR2 = 0.1182                                         |                 |
| R indices (all data)              | R1 = 0.0488, wR2 = 0.1211                                         |                 |
| Largest diff. peak and hole       | 0.542 and -0.586 e.Å <sup>-3</sup>                                |                 |

### **LF<sub>2</sub>N(Me<sub>2</sub>Si(CH<sub>2</sub>)<sub>2</sub>SiMe<sub>2</sub>)**

Low-temperature diffraction data ( $\omega$ -scans) were collected on a Rigaku MicroMax-007HF diffractometer coupled to a Saturn994+ CCD detector with Cu K $\alpha$  ( $\lambda = 1.54178 \text{ \AA}$ ). The diffraction images were processed and scaled using Rigaku Oxford Diffraction software (CrysAlisPro; Rigaku OD: The Woodlands, TX, 2015). The structure was solved with SHELXT and was refined against  $F^2$  on all data by full-matrix least squares with SHELXL.<sup>12</sup> All non-hydrogen atoms were refined anisotropically. Hydrogen atoms were included in the model at geometrically calculated positions and refined using a riding model. The isotropic displacement parameters of all hydrogen atoms were fixed to 1.2 times the  $U$  value of the atoms to which they are linked (1.5 times for methyl groups). Carbon 4 was disordered over two equally occupied positions. No additional restraints or constraints were needed for the disordered model to converge. CCDC number 2226341 contains the supplementary crystallographic data for this structure.

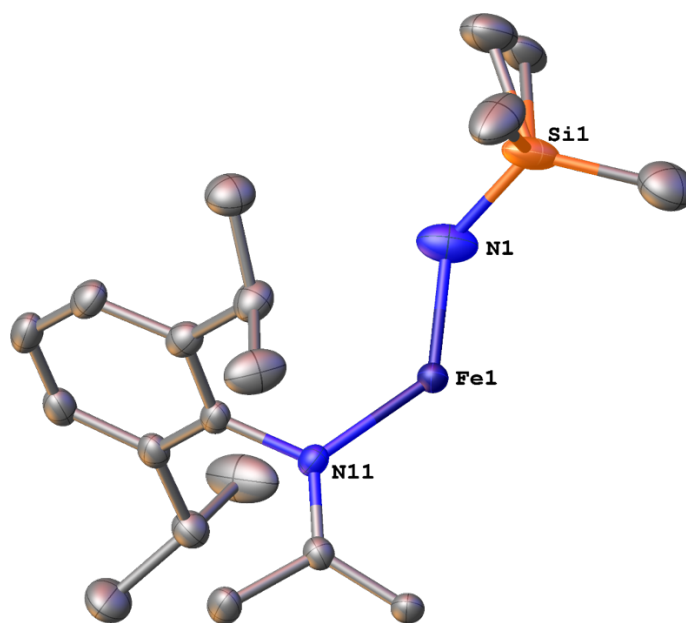

**Figure S57.** A partial numbering scheme of **LF<sub>2</sub>N(Me<sub>2</sub>Si(CH<sub>2</sub>)<sub>2</sub>SiMe<sub>2</sub>)** with 50% thermal ellipsoid probability levels. The hydrogen atoms are omitted for clarity. Only the asymmetric unit is shown; the molecule lies on a crystallographic 2-fold rotation axis.

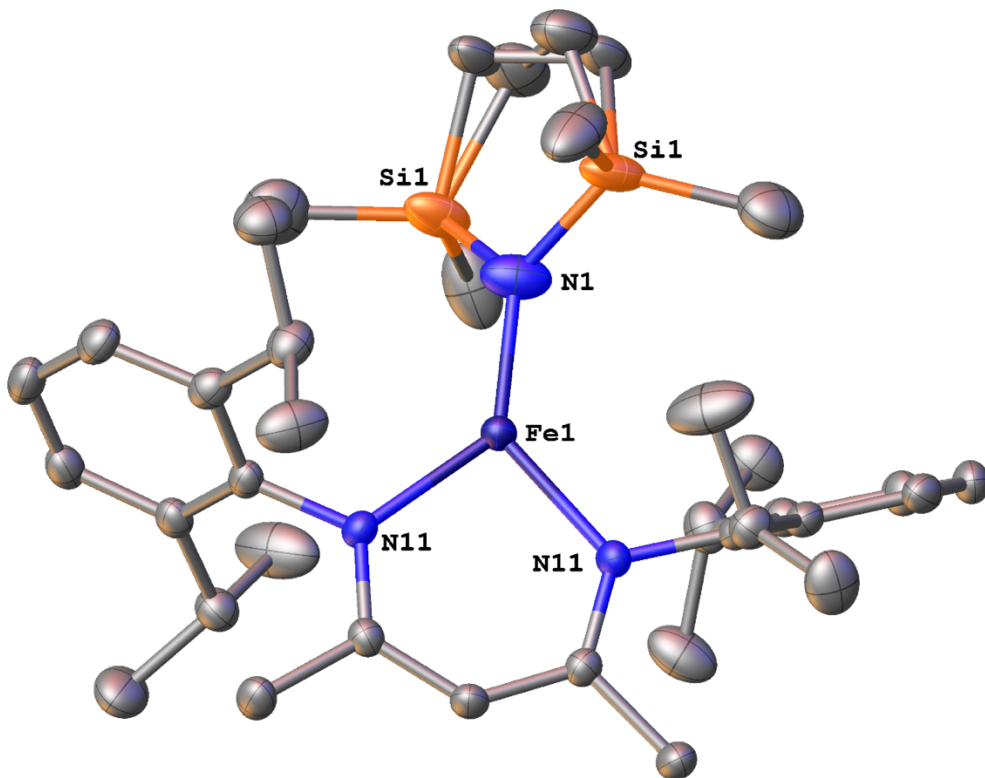

**Figure S58.** A partial numbering scheme showing the full model of  $\text{LFeN}(\text{Me}_2\text{Si}(\text{CH}_2)_2\text{SiMe}_2)$  with 50% thermal ellipsoid probability levels. The hydrogen atoms are omitted for clarity. In this diagram, the symmetry-related atoms (two-fold rotation axis) are shown with the same label.



Table S4. Crystal data and structure refinement for **LFeN(Me<sub>2</sub>Si(CH<sub>2</sub>)<sub>2</sub>SiMe<sub>2</sub>)**.

|                                   |                                                                   |          |
|-----------------------------------|-------------------------------------------------------------------|----------|
| Identification code               | 007a-22067                                                        |          |
| CCDC Number                       | 2226341                                                           |          |
| Empirical formula                 | C <sub>35</sub> H <sub>57</sub> Fe N <sub>3</sub> Si <sub>2</sub> |          |
| Formula weight                    | 631.86                                                            |          |
| Temperature                       | 93(2) K                                                           |          |
| Wavelength                        | 1.54184 Å                                                         |          |
| Crystal system                    | Orthorhombic                                                      |          |
| Space group                       | Pbcn                                                              |          |
| Unit cell dimensions              | a = 10.11510(10) Å                                                | α = 90°. |
|                                   | b = 17.6923(2) Å                                                  | β = 90°. |
|                                   | c = 20.5843(3) Å                                                  | γ = 90°. |
| Volume                            | 3683.75(8) Å <sup>3</sup>                                         |          |
| Z                                 | 4                                                                 |          |
| Density (calculated)              | 1.139 g/cm <sup>3</sup>                                           |          |
| Absorption coefficient            | 4.087 mm <sup>-1</sup>                                            |          |
| F(000)                            | 1368                                                              |          |
| Crystal size                      | 0.200 x 0.200 x 0.020 mm <sup>3</sup>                             |          |
| Crystal color and habit           | Black Plate                                                       |          |
| Diffractometer                    | Rigaku Saturn 944+ CCD                                            |          |
| Theta range for data collection   | 5.000 to 66.583°.                                                 |          |
| Index ranges                      | -12 ≤ h ≤ 12, -21 ≤ k ≤ 21, -24 ≤ l ≤ 24                          |          |
| Reflections collected             | 107553                                                            |          |
| Independent reflections           | 3248 [R(int) = 0.1035]                                            |          |
| Observed reflections (I > 2σ(I))  | 2998                                                              |          |
| Completeness to theta = 66.583°   | 99.7 %                                                            |          |
| Absorption correction             | Semi-empirical from equivalents                                   |          |
| Max. and min. transmission        | 1.00000 and 0.66668                                               |          |
| Solution method                   | SHELXT-2014/5 (Sheldrick, 2014)                                   |          |
| Refinement method                 | SHELXL-2014/7 (Sheldrick, 2014)                                   |          |
| Data / restraints / parameters    | 3248 / 6 / 203                                                    |          |
| Goodness-of-fit on F <sup>2</sup> | 1.100                                                             |          |
| Final R indices [I > 2σ(I)]       | R1 = 0.0488, wR2 = 0.1297                                         |          |
| R indices (all data)              | R1 = 0.0521, wR2 = 0.1324                                         |          |
| Largest diff. peak and hole       | 0.982 and -0.735 e.Å <sup>-3</sup>                                |          |

## LF<sub>2</sub>NN(Me<sub>2</sub>Si(CH<sub>2</sub>)<sub>2</sub>SiMe<sub>2</sub>) (8)

Low-temperature diffraction data ( $\omega$ -scans) were collected on a Rigaku MicroMax-007HF diffractometer coupled to a Saturn994+ CCD detector with Cu K $\alpha$  ( $\lambda = 1.54178 \text{ \AA}$ ). The diffraction images were processed and scaled using Rigaku Oxford Diffraction software (CrysAlisPro; Rigaku OD: The Woodlands, TX, 2015). The structure was solved with SHELXT and was refined against  $F^2$  on all data by full-matrix least squares with SHELXL.<sup>12</sup> All non-hydrogen atoms were refined anisotropically. Hydrogen atoms were included in the model at geometrically calculated positions and refined using a riding model. The isotropic displacement parameters of all hydrogen atoms were fixed to 1.2 times the  $U$  value of the atoms to which they are linked (1.5 times for methyl groups). The reflections were refined as a 2-component twin. The disilylhydrazido group is present in partial occupancy. The site occupancy factors (SOFs) for atoms Si1A, Si2A, N1A, N2A, C30A, C31A were freely refined and converged near a value of 0.75. These SOFs were subsequently fixed at 0.75. The minor component was modeled with SOFs of 0.25, and the chemical composition of this second species is not yet known. CCDC number 2226342 contains the supplementary crystallographic data for this structure.

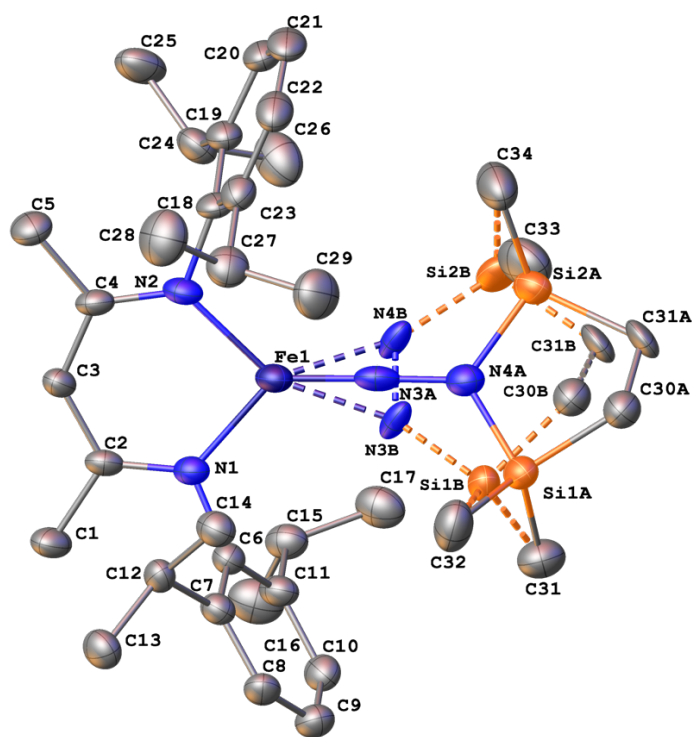

**Figure S59.** A complete numbering scheme of the crystallographic model of **8** with 50% thermal ellipsoid probability levels. The major component (0.75 occupancy) is atoms labeled as A, and the minor component (0.25 occupancy) is atoms labeled as B. The identity of the minor component is not known. The hydrogen atoms are omitted for clarity.

Table S5. Crystal data and structure refinement for **8**.

|                                   |                                                                   |                 |
|-----------------------------------|-------------------------------------------------------------------|-----------------|
| Identification code               | 007a-22141                                                        |                 |
| CCDC Number                       | 2226342                                                           |                 |
| Empirical formula                 | C <sub>35</sub> H <sub>57</sub> Fe N <sub>4</sub> Si <sub>2</sub> |                 |
| Formula weight                    | 645.87                                                            |                 |
| Temperature                       | 93(2) K                                                           |                 |
| Wavelength                        | 1.54184 Å                                                         |                 |
| Crystal system                    | Monoclinic                                                        |                 |
| Space group                       | P2 <sub>1</sub> /n                                                |                 |
| Unit cell dimensions              | a = 10.6104(5) Å                                                  | α = 90°.        |
|                                   | b = 20.3504(8) Å                                                  | β = 95.909(4)°. |
|                                   | c = 17.3268(8) Å                                                  | γ = 90°.        |
| Volume                            | 3721.4(3) Å <sup>3</sup>                                          |                 |
| Z                                 | 4                                                                 |                 |
| Density (calculated)              | 1.153 g/cm <sup>3</sup>                                           |                 |
| Absorption coefficient            | 4.065 mm <sup>-1</sup>                                            |                 |
| F(000)                            | 1396                                                              |                 |
| Crystal size                      | 0.200 x 0.200 x 0.020 mm <sup>3</sup>                             |                 |
| Crystal color and habit           | Black Plate                                                       |                 |
| Diffractometer                    | Rigaku Saturn 944+ CCD                                            |                 |
| Theta range for data collection   | 3.360 to 66.652°.                                                 |                 |
| Index ranges                      | -12 ≤ h ≤ 12, -24 ≤ k ≤ 24, -16 ≤ l ≤ 20                          |                 |
| Reflections collected             | 6549                                                              |                 |
| Independent reflections           | 6549 [R(int) = 0.1175]                                            |                 |
| Observed reflections (I > 2σ(I))  | 4992                                                              |                 |
| Completeness to theta = 66.652°   | 99.5 %                                                            |                 |
| Absorption correction             | Semi-empirical from equivalents                                   |                 |
| Max. and min. transmission        | 1.00000 and 0.84505                                               |                 |
| Solution method                   | SHELXT-2014/5 (Sheldrick, 2014)                                   |                 |
| Refinement method                 | SHELXL-2014/7 (Sheldrick, 2014)                                   |                 |
| Data / restraints / parameters    | 6549 / 6 / 436                                                    |                 |
| Goodness-of-fit on F <sup>2</sup> | 1.087                                                             |                 |
| Final R indices [I > 2σ(I)]       | R1 = 0.0819, wR2 = 0.2318                                         |                 |
| R indices (all data)              | R1 = 0.1047, wR2 = 0.2464                                         |                 |
| Largest diff. peak and hole       | 0.843 and -0.675 e.Å <sup>-3</sup>                                |                 |

### LFeN(Me<sub>2</sub>Si(CH<sub>2</sub>)<sub>2</sub>SiMe<sub>2</sub>)NMe (10)

Low-temperature diffraction data ( $\omega$ -scans) were collected on a Rigaku MicroMax-007HF diffractometer coupled to a Saturn994+ CCD detector with Cu K $\alpha$  ( $\lambda = 1.54178 \text{ \AA}$ ). The diffraction images were processed and scaled using Rigaku Oxford Diffraction software. The structure was solved with SHELXT and was refined against  $F^2$  on all data by full-matrix least squares with SHELXL.<sup>12</sup> All non-hydrogen atoms were refined anisotropically. Hydrogen atoms were included in the model at geometrically calculated positions and refined using a riding model. The isotropic displacement parameters of all hydrogen atoms were fixed to 1.2 times the U value of the atoms to which they are linked (1.5 times for methyl groups). The Si-N-N-CH<sub>3</sub> coordinated to Fe1 is disordered over two positions. The site occupancies were freely refined and converged near a population distribution of 0.75/0.25. The major component has atom suffixes “4”, the minor has “B”. Due to the low occupancies, the thermal parameters of the minor component were constrained to be similar to their major counterpart with a small uncertainty (0.002). The disordered Si-N distances were restrained to be similar with a small uncertainty (0.002). No additional restraints were needed for a stable refinement. Two reflections were omitted from the least squares refinement due to detector artifacts. The full numbering scheme of compound 007-a23018 can be found in the full details of the X-ray structure determination (CIF), which is included as Supporting Information. CCDC number 2303073 contains the supplementary crystallographic data for this structure.

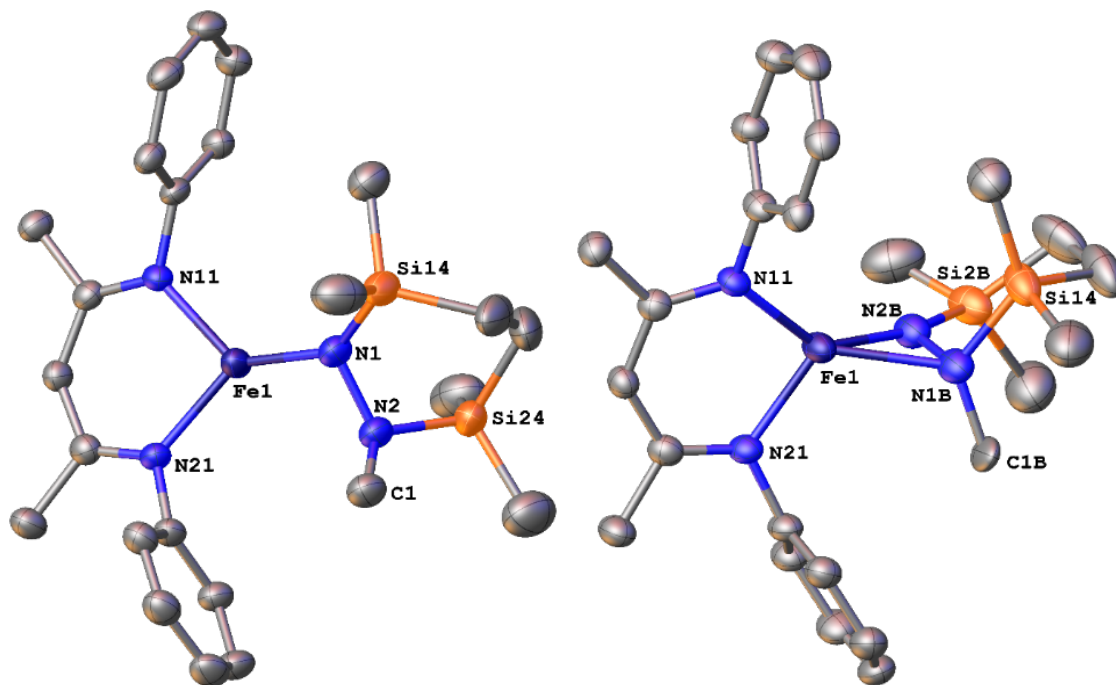

**Figure S60.** A complete numbering scheme of **10** with 50% thermal ellipsoid probability levels. The hydrogen atoms are omitted for clarity. The  $\eta^1$  isomer (**10-1**, 75%) is shown on the left, and the  $\eta^2$  isomer (**10-2**, 25%) is shown on the right.

Table S6. Crystal data and structure refinement for **10**.

|                                   |                                                                   |                 |
|-----------------------------------|-------------------------------------------------------------------|-----------------|
| Identification code               | 007a-23018                                                        |                 |
| Empirical formula                 | C <sub>36</sub> H <sub>60</sub> Fe N <sub>4</sub> Si <sub>2</sub> |                 |
| Formula weight                    | 660.91                                                            |                 |
| Temperature                       | 93(2) K                                                           |                 |
| Wavelength                        | 1.54184 Å                                                         |                 |
| Crystal system                    | Triclinic                                                         |                 |
| Space group                       | P-1                                                               |                 |
| Unit cell dimensions              | a = 8.6993(4) Å                                                   | α = 88.974(3)°. |
|                                   | b = 12.0566(4) Å                                                  | β = 82.392(3)°. |
|                                   | c = 18.0449(6) Å                                                  | γ = 83.828(3)°. |
| Volume                            | 1865.07(12) Å <sup>3</sup>                                        |                 |
| Z                                 | 2                                                                 |                 |
| Density (calculated)              | 1.177 g/cm <sup>3</sup>                                           |                 |
| Absorption coefficient            | 4.065 mm <sup>-1</sup>                                            |                 |
| F(000)                            | 716                                                               |                 |
| Crystal size                      | 0.400 x 0.400 x 0.050 mm <sup>3</sup>                             |                 |
| Crystal color and habit           | brown plate                                                       |                 |
| Diffractometer                    | Rigaku Saturn 944+ CCD                                            |                 |
| Theta range for data collection   | 2.470 to 66.587°.                                                 |                 |
| Index ranges                      | -10 ≤ h ≤ 9, -14 ≤ k ≤ 14, -21 ≤ l ≤ 21                           |                 |
| Reflections collected             | 57657                                                             |                 |
| Independent reflections           | 6463 [R(int) = 0.0834]                                            |                 |
| Observed reflections (I > 2σ(I))  | 5788                                                              |                 |
| Completeness to theta = 66.587°   | 97.9 %                                                            |                 |
| Absorption correction             | Semi-empirical from equivalents                                   |                 |
| Max. and min. transmission        | 1.00000 and 0.48700                                               |                 |
| Solution method                   | SHELXT-2014/5 (Sheldrick, 2014)                                   |                 |
| Refinement method                 | SHELXL-2014/7 (Sheldrick, 2014)                                   |                 |
| Data / restraints / parameters    | 6463 / 48 / 440                                                   |                 |
| Goodness-of-fit on F <sup>2</sup> | 1.160                                                             |                 |
| Final R indices [I > 2σ(I)]       | R1 = 0.0533, wR2 = 0.1468                                         |                 |
| R indices (all data)              | R1 = 0.0600, wR2 = 0.1613                                         |                 |
| Extinction coefficient            | n/a                                                               |                 |
| Largest diff. peak and hole       | 0.394 and -0.717 e.Å <sup>-3</sup>                                |                 |

### **LFeN(Ph)N(Me<sub>2</sub>Si(CH<sub>2</sub>)<sub>2</sub>SiMe<sub>2</sub>) (12)**

Low-temperature diffraction data ( $\omega$ -scans) were collected on a Rigaku MicroMax-007HF diffractometer coupled to a Saturn994+ CCD detector with Cu K $\alpha$  ( $\lambda = 1.54178 \text{ \AA}$ ). The diffraction images were processed and scaled using Rigaku Oxford Diffraction software (CrysAlisPro; Rigaku OD: The Woodlands, TX, 2015). The structure was solved with SHELXT and was refined against  $F^2$  on all data by full-matrix least squares with SHELXL.<sup>12</sup> All non-hydrogen atoms were refined anisotropically. Hydrogen atoms were included in the model at calculated positions and refined using a riding model. The isotropic displacement parameters of all hydrogen atoms were fixed to 1.2 times the  $U$  value of the atoms to which they are linked (1.5 times for methyl groups). CCDC number 2226344 contains the supplementary crystallographic data for this structure.

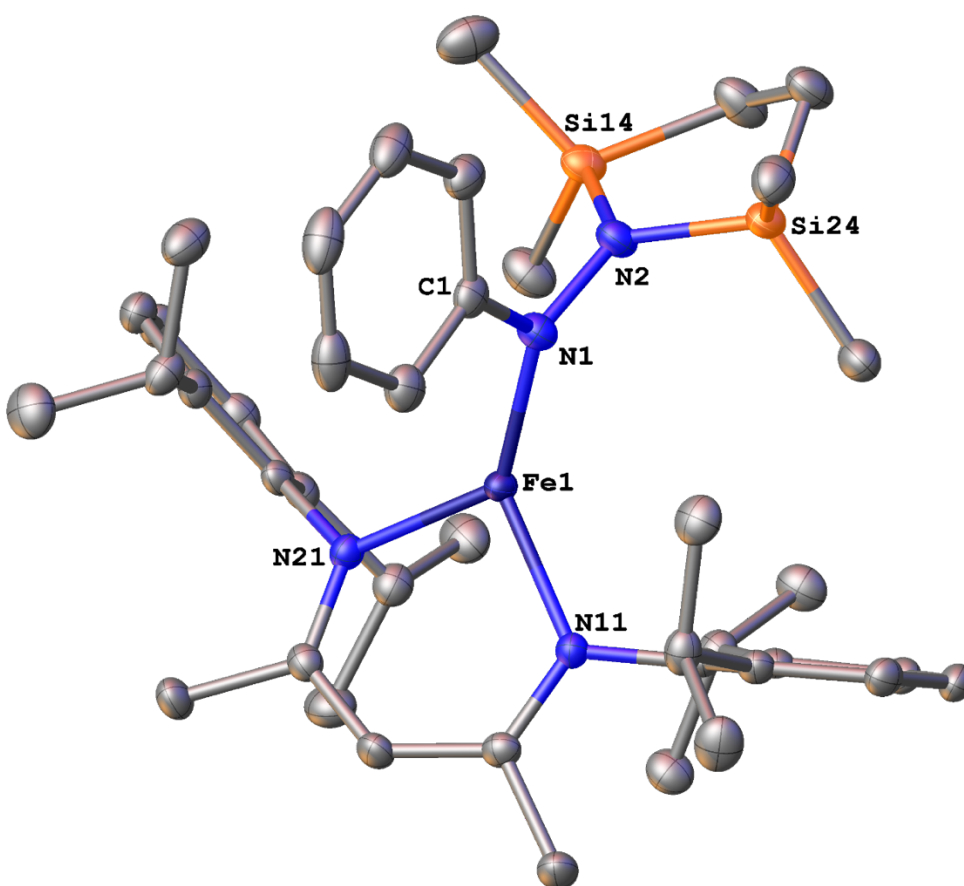

**Figure S61.** A partial numbering scheme of **12** with 50% thermal ellipsoid probability levels. The hydrogen atoms are omitted for clarity.

Table S7. Crystal data and structure refinement for **12**.

|                                   |                                                                   |                   |
|-----------------------------------|-------------------------------------------------------------------|-------------------|
| Identification code               | 007a-22007                                                        |                   |
| CCDC Number                       | 2226344                                                           |                   |
| Empirical formula                 | C <sub>41</sub> H <sub>62</sub> Fe N <sub>4</sub> Si <sub>2</sub> |                   |
| Formula weight                    | 722.97                                                            |                   |
| Temperature                       | 93(2) K                                                           |                   |
| Wavelength                        | 1.54184 Å                                                         |                   |
| Crystal system                    | Monoclinic                                                        |                   |
| Space group                       | P2 <sub>1</sub> /n                                                |                   |
| Unit cell dimensions              | a = 11.9946(2) Å                                                  | α = 90°.          |
|                                   | b = 19.7217(3) Å                                                  | β = 95.2570(10)°. |
|                                   | c = 17.1523(3) Å                                                  | γ = 90°.          |
| Volume                            | 4040.38(12) Å <sup>3</sup>                                        |                   |
| Z                                 | 4                                                                 |                   |
| Density (calculated)              | 1.189 Mg/m <sup>3</sup>                                           |                   |
| Absorption coefficient            | 3.798 mm <sup>-1</sup>                                            |                   |
| F(000)                            | 1560                                                              |                   |
| Crystal size                      | 0.200 x 0.200 x 0.020 mm <sup>3</sup>                             |                   |
| Crystal color and habit           | Black Plate                                                       |                   |
| Diffractometer                    | Rigaku Saturn 944+ CCD                                            |                   |
| Theta range for data collection   | 3.423 to 66.601°.                                                 |                   |
| Index ranges                      | -14 ≤ h ≤ 14, -23 ≤ k ≤ 23, -20 ≤ l ≤ 20                          |                   |
| Reflections collected             | 126800                                                            |                   |
| Independent reflections           | 7123 [R(int) = 0.0574]                                            |                   |
| Observed reflections (I > 2σ(I))  | 6762                                                              |                   |
| Completeness to theta = 66.601°   | 99.8 %                                                            |                   |
| Absorption correction             | Semi-empirical from equivalents                                   |                   |
| Max. and min. transmission        | 1.00000 and 0.79405                                               |                   |
| Solution method                   | SHELXT-2014/5 (Sheldrick, 2014)                                   |                   |
| Refinement method                 | SHELXL-2014/7 (Sheldrick, 2014)                                   |                   |
| Data / restraints / parameters    | 7123 / 0 / 447                                                    |                   |
| Goodness-of-fit on F <sup>2</sup> | 1.037                                                             |                   |
| Final R indices [I > 2σ(I)]       | R1 = 0.0295, wR2 = 0.0733                                         |                   |
| R indices (all data)              | R1 = 0.0313, wR2 = 0.0744                                         |                   |
| Largest diff. peak and hole       | 0.379 and -0.318 e.Å <sup>-3</sup>                                |                   |

## Computations

DFT calculations were performed using ORCA version 5.0.3. Structures were optimized using the B3LYP functional (unless otherwise noted) and ZORA-def2-TZVP basis set. All computations used the D3BJ dispersion correction and an implicit continuum solvation model. Minima were confirmed by the presence of only real frequencies. Transition states were confirmed by the presence of one imaginary frequency corresponding to N–C bond formation. Mössbauer calculations were performed on the optimized structures, and isomer shifts were derived using our established correlation for diketiminate complexes.<sup>14</sup>

Example input file for geometry optimization and frequency calculation:

```
! UKS B3LYP TightOpt ZORA-def2-TZVP ZORA RIJCOSX SARC/J
! TightSCF D3BJ CPCMC(toluene) NumFreq

%pal nprocs 20 end

%rel OneCenter true
end

%output
Print [ P_Basis ] 2
Print [ P_MOs ] 1
end

%scf MaxIter 800
shift shift 0.3 erroff 0.0 end
end

* xyzfile 0 5 LFeCH2TMSNNSiSi.xyz
```



Example input file which generated QRO files for plotting:

```
! UKS B3LYP UNO UCO NormalPrint ZORA-def2-TZVP ZORA RIJCOSX SARC/J
! TightSCF D3BJ CPCMC(toluene)

%pal nprocs 20 end

%rel OneCenter true
end

%output
Print [ P_Basis ] 2
Print [ P_MOs ] 1
end

%scf MaxIter 800
shift shift 0.3 erroff 0.0 end
end

* xyzfile 0 5 LFeCH2TMSNNSiSi_0_m5_B3LYP_def2-TZVP_OptHessFreq.xyz
```

Example input file which generated Mössbauer parameters:

```
! UKS B3LYP ZORA-def2-TZVP ZORA
! TightSCF D3BJ CPCMC(toluene)

%Method SpecialGridAtoms 26
SpecialGridIntAcc 7 end

%pal nprocs 20 end

%scf MaxIter 800
shift shift 0.3 erroff 0.0 end
end

* xyzfile 0 2 LFeNNSiSi_0_m2_B3LYP_def2-TZVP_OptHessFreq.xyz

%eprnmr
nuclei = all Fe {fgrad,rho} end
```

Example input file for NEB calculations:

```
! BP86 D3BJ ZORA ZORA-def2-TZVP
! UKS RI SARC/J
! NOPRINTMOS
! NEB-CI

%scf maxiter 800
end

%pal nprocs 20
end

%neb
NEB_End_XYZFile "LFeNMeNSiSi-m3-NEB.xyz"
Nimages 8
preopt_ends false
end

* xyzfile 0 3 LFeNMeNNSiSi-m3-NEB.xyz
```

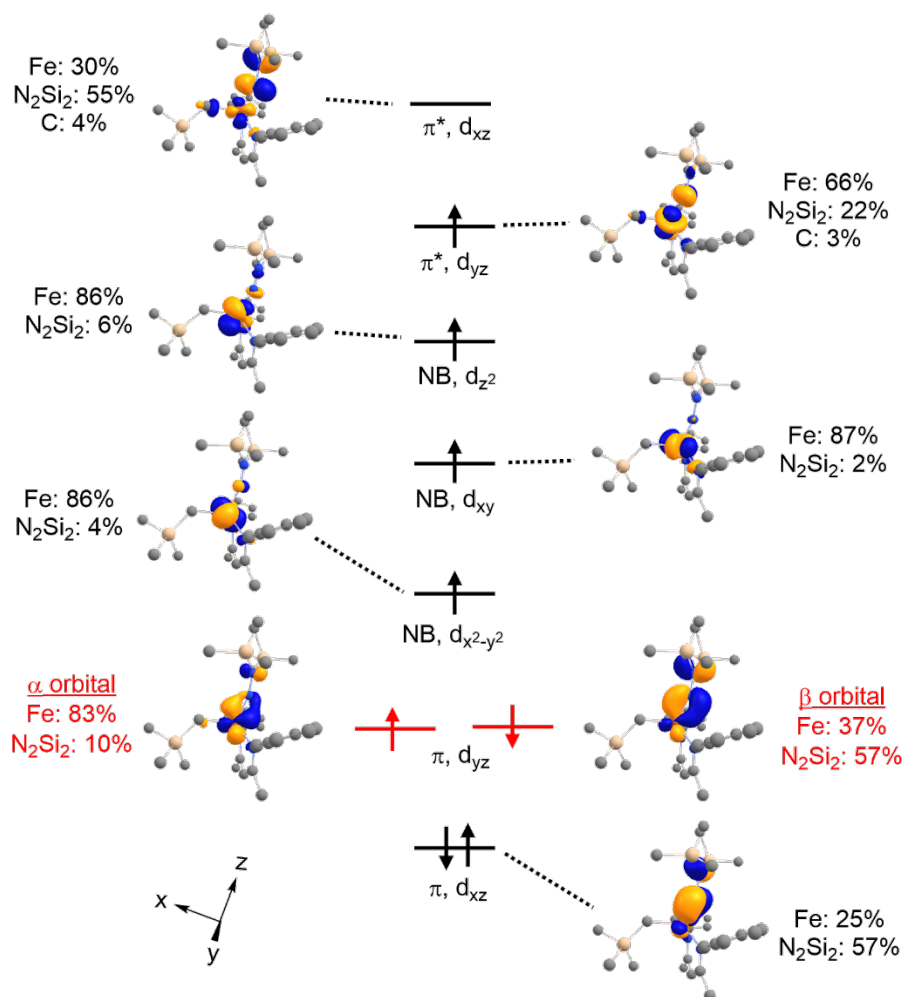

**Figure S62.** Qualitative molecular orbital diagram showing the QROs of **7a** ( $S = 2$ ) with QRO plots shown at an isovalue of 0.05 au. In red are the one-electron orbitals for the corresponding pair in the spin-polarized Fe–N  $\pi$ -bond.

**Table S8.** Comparison of experimental and DFT-calculated bond metrics and Mössbauer parameters of complex **7a** ( $S = 1$  and  $2$ ), as well as previously reported iron(IV) hydrazido(2-) complexes **2** and **7-CC'Bu**.<sup>15</sup>

|                                      | <b>7a (Expt)</b> | <b>7a (Calcd <math>S = 1</math>)</b> | <b>7a (Calcd <math>S = 2</math>)</b> | <b>2</b> | <b>7-CC'Bu</b> |
|--------------------------------------|------------------|--------------------------------------|--------------------------------------|----------|----------------|
| Spin State                           | $S = 2$          | $S = 1$                              | $S = 2$                              | $S = 1$  | $S = 2$        |
| Fe–N <sub>hyd</sub> (Å)              | 1.749(2)         | 1.690                                | 1.770                                | 1.672(3) | 1.7561(15)     |
| Ave. Fe–N <sub>L</sub> (Å)           | 2.051(1)         | 1.993                                | 2.039                                | 1.971(2) | 2.028(1)       |
| Fe–C (Å)                             | 2.065(2)         | 2.042                                | 2.069                                | 1.999(4) | 1.9877(17)     |
| N–N (Å)                              | 1.326(3)         | 1.300                                | 1.292                                | 1.340(4) | 1.305(2)       |
| $\tau_4$                             | 0.88             | 0.82                                 | 0.94                                 | 0.75     | 0.93           |
| $\delta$ (mm s <sup>-1</sup> )       | 0.33             | 0.27                                 | 0.37                                 | 0.17     | 0.36           |
| $ \Delta E_Q $ (mm s <sup>-1</sup> ) | 1.58             | 2.30                                 | 1.63                                 | 1.49     | 1.83           |

**Table S9.** Comparison of bond lengths and Mössbauer parameters between the experimental structures of **8** and LFeNN(SiMe<sub>3</sub>)<sub>2</sub> versus DFT computed parameters using BP86 and B3LYP. All computations used the def2-TZVP basis set.

| Compound                                       | Functional | Spin state | Fe–N <sub>2</sub> (Å) | Ave. Fe–N <sub>Nacnac</sub> (Å) | Rel. Energy (kcal mol <sup>-1</sup> ) | δ (mm s <sup>-1</sup> ) | ΔE <sub>Q</sub>   (mm s <sup>-1</sup> ) |
|------------------------------------------------|------------|------------|-----------------------|---------------------------------|---------------------------------------|-------------------------|-----------------------------------------|
| <b>8</b>                                       | Exp.       | 1/2        |                       |                                 |                                       | 0.13                    | 2.13                                    |
|                                                |            | 3/2        |                       |                                 |                                       | 0.51                    | 1.75                                    |
|                                                | BP86       | 1/2        | 1.627                 | 1.872                           | 0                                     | 0.12                    | 2.04                                    |
|                                                |            | 3/2        | 1.689                 | 1.911                           | 9                                     | 0.48                    | 1.83                                    |
|                                                | B3LYP      | 1/2        | 1.653                 | 1.914                           | 2                                     | 0.24                    | 1.76                                    |
|                                                |            | 3/2        | 1.731                 | 1.980                           | 0.0                                   | 0.67                    | 1.36                                    |
| LFeNN(SiMe <sub>3</sub> ) <sub>2</sub> (ref 5) | Exp.       | 1/2        | 1.638(2)              | 1.924(1)                        |                                       | 0.22                    | 1.99                                    |
|                                                |            | 3/2        | 1.671(2)              | 1.948(1)                        |                                       | 0.46                    | 1.16                                    |
|                                                | BP86       | 1/2        | 1.628                 | 1.885                           | 0.0                                   | 0.14                    | 1.93                                    |
|                                                |            | 3/2        | 1.690                 | 1.919                           | 9                                     | 0.51                    | 1.72                                    |
|                                                |            | 5/2        | 1.774                 | 1.962                           | 31                                    | 0.61                    | 3.69                                    |
|                                                | B3LYP      | 1/2        | 1.660                 | 1.924                           | 1                                     |                         |                                         |
|                                                |            | 3/2        | 1.725                 | 1.972                           | 0                                     |                         |                                         |
|                                                |            | 5/2        | 1.850                 | 2.002                           | 15                                    |                         |                                         |

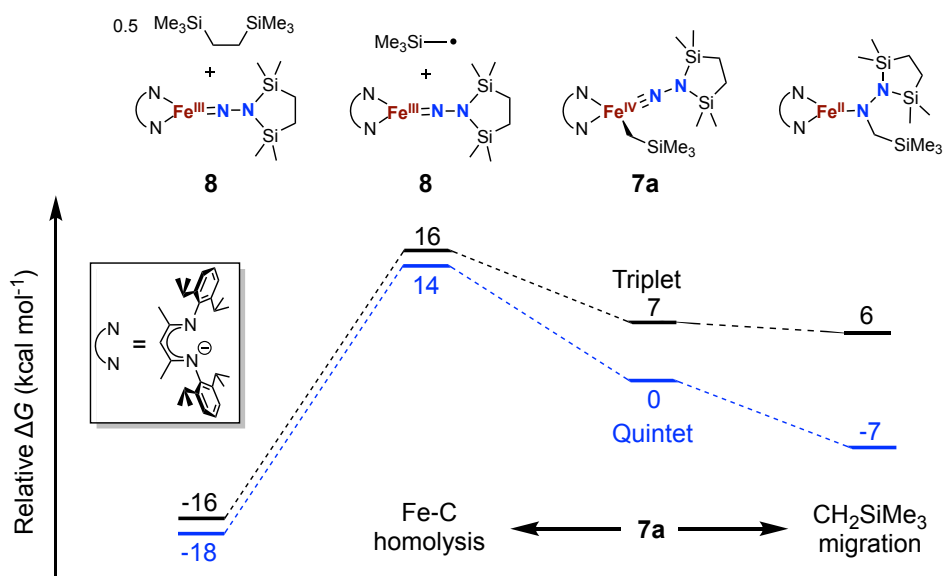

**Figure S67.** B3LYP/def2-TZVP calculated potential energy surface showing the competing reaction pathways of Fe–C bond homolysis and CH<sub>2</sub>SiMe<sub>3</sub> migration starting from **7a**. Transition states for the migration pathway could not be found.

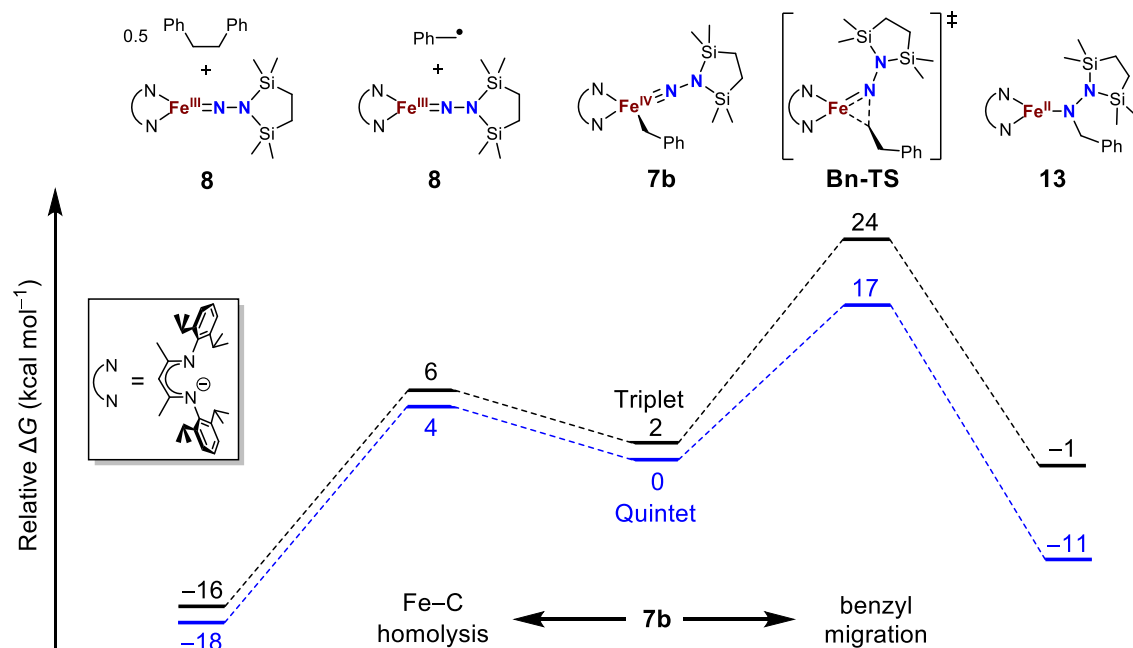

**Figure S68.** B3LYP/def2-TZVP calculated potential energy surface showing the competing reaction pathways of Fe-C bond homolysis and benzyl migration starting from **7b**.

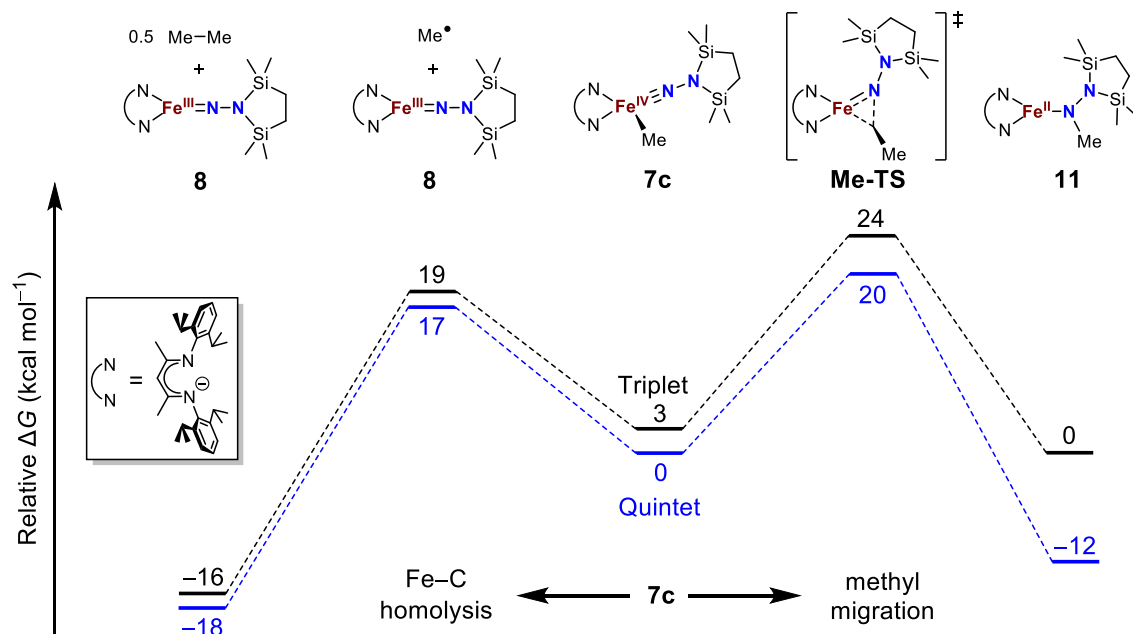

**Figure S69.** B3LYP/def2-TZVP calculated potential energy surface showing the competing reaction pathways of Fe-C bond homolysis and methyl migration starting from **7c**.

**Table S10.** Comparison between experimental and calculated bond lengths for **10**. The calculated distances for the triplet  $\eta^2$  structure are given only for the lowest-energy conformer. We were unable to optimize the  $\eta^1$  isomer in the triplet ground state.

|          | Atom Pair | Experimental Distance (Å) | DFT-Optimized Distance, $S = 2$ (Å) | DFT-Optimized Length, $S = 1$ (Å) |
|----------|-----------|---------------------------|-------------------------------------|-----------------------------------|
| $\eta^1$ | Fe1–N1    | 1.900(3)                  | 1.88                                |                                   |
|          | Fe1···N2  | 2.639                     | 2.64                                |                                   |
|          | N1–Si14   | 1.745(3)                  | 1.74                                |                                   |
|          | N2–Si24   | 1.734(5)                  | 1.75                                |                                   |
| $\eta^2$ | Fe1–N1B   | 2.208(12)                 | 2.26                                | 2.04                              |
|          | Fe1–N2B   | 1.983(10)                 | 1.91                                | 1.85                              |
|          | N1B–Si14  | 1.770(10)                 | 1.78                                | 1.80                              |
|          | N2B–Si2B  | 1.760(13)                 | 1.73                                | 1.73                              |

**Table S11.** Calculated  $\Delta G$  and Mössbauer parameters for optimized  $\eta^1$  and  $\eta^2$  isomers of **10** with  $S = 1$  and  $2$ , along with the experimental Mössbauer spectrum fit parameters assigned to each species. The table corresponds to the three-component fit in Figure S22. The fit was obtained by first inputting the calculated Mössbauer parameters for the three lowest-energy isomers. The percent composition,  $\delta$ , and  $|\Delta E_Q|$  of each doublet was then allowed to vary, while  $\Gamma$  was fixed to  $0.50 \text{ mm s}^{-1}$ . Enabling  $\Gamma$  to float always resulted in at least one doublet broadening to unphysical values of  $\Gamma > 3 \text{ mm s}^{-1}$ . Thus, a Mössbauer doublet line width comparable to hydrazido species **12** was selected for each component.

| Species               | $\Delta G$ (DFT, kcal mol <sup>-1</sup> ) | Percent of exp. fit (%) | $\delta$ exp. fit (mm s <sup>-1</sup> ) | $\delta$ calcd (mm s <sup>-1</sup> ) | $ \Delta E_Q $ exp. fit (mm s <sup>-1</sup> ) | $ \Delta E_Q $ calcd (mm s <sup>-1</sup> ) |
|-----------------------|-------------------------------------------|-------------------------|-----------------------------------------|--------------------------------------|-----------------------------------------------|--------------------------------------------|
| $\eta^1$ ( $S = 2$ )  | 0                                         | 54                      | 0.68                                    | 0.60                                 | 0.96                                          | 0.95                                       |
| $\eta^2$ ( $S = 1$ )  | 4                                         | 37                      | 0.55                                    | 0.60                                 | 1.28                                          | 1.16                                       |
| $\eta^2$ ( $S = 2$ )  | 3                                         | 9                       | 0.98                                    | 0.91                                 | 1.45                                          | 1.49                                       |
| $\eta^2$ ( $S = 1$ )* | 17                                        | 0                       | n/a                                     | 0.69                                 | n/a                                           | 1.08                                       |

\* We also obtained a second conformer, which has a different conformation in the six-membered ligand ring. Since it was calculated to have a higher energy and was not needed to explain the Mössbauer fit, it is not discussed further here. We were unable to optimize the  $\eta^1$  isomer in the triplet ground state.

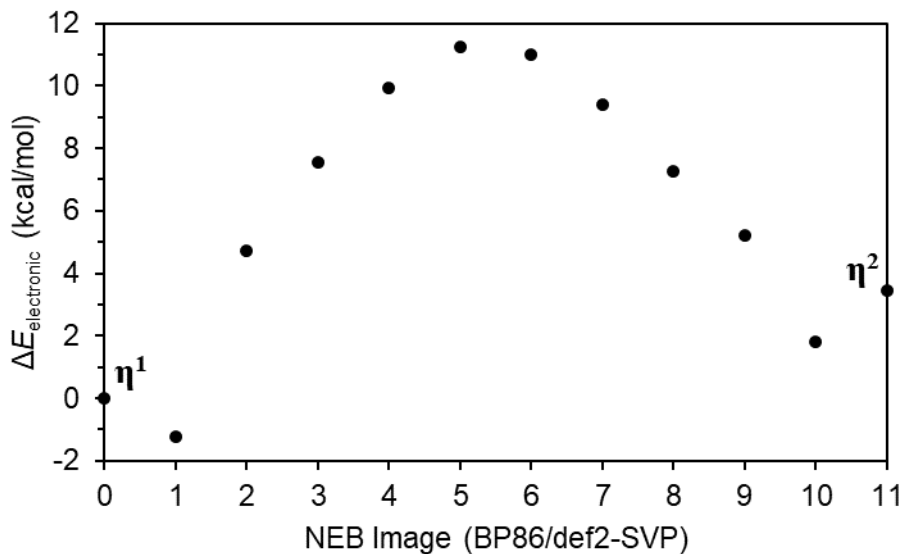

**Figure S70.** Electronic energy during isomerization of **10** between  $\eta^1$  and  $\eta^2$  structures on the quintet surface. The plot was generated using the NEB method at the BP86/def2-SVP level of theory. The starting and ending structures were obtained from optimization of  $S = 2$   $\eta^1$  and  $\eta^2$  structures using B3LYP/ZORA-def2-TZVP, and they were not re-optimized at the NEB level of theory during the energy scan (hence the starting and ending structures are not minima on this surface). This scan demonstrates that there is a low-energy pathway between isomers, and they could be interconverting readily in solution and during crystallization.

## CASSCF Computations

Complete active space self-consistent field (CASSCF) calculations were performed on a single root to interrogate whether a multiconfigurational nature of the triplet ground state of compound **5a** may be present. The active space consists of 8 electrons in 7 orbitals (CASSCF(8,7)), which were chosen from the DFT-generated QROs to include all Fe-based orbitals and N-N pi system. The def2-TZVP basis set was used,<sup>16</sup> and relativistic effects added with the zeroth order regular approximation (ZORA).<sup>17</sup> The RIJCOSX approximation was implemented to decrease computational cost,<sup>18</sup> with the accompanying auxiliary basis formulated using the AutoAux keyword. All CASSCF-derived orbital plots show the natural orbitals.

The dynamic electron correlation energies of the triplet and quintet ground states were then added using strongly-contracted second-order *n*-electron valence state perturbation theory (NEVPT2), and computational cost was improved with the resolution of identity (RI) approximation.<sup>19</sup> Thermal corrections from the B3LYP/def2-TZVP DFT calculations were added to the single-point CASSCF/NEVPT2 energies.



Occupation number is listed at the bottom left of each orbital.

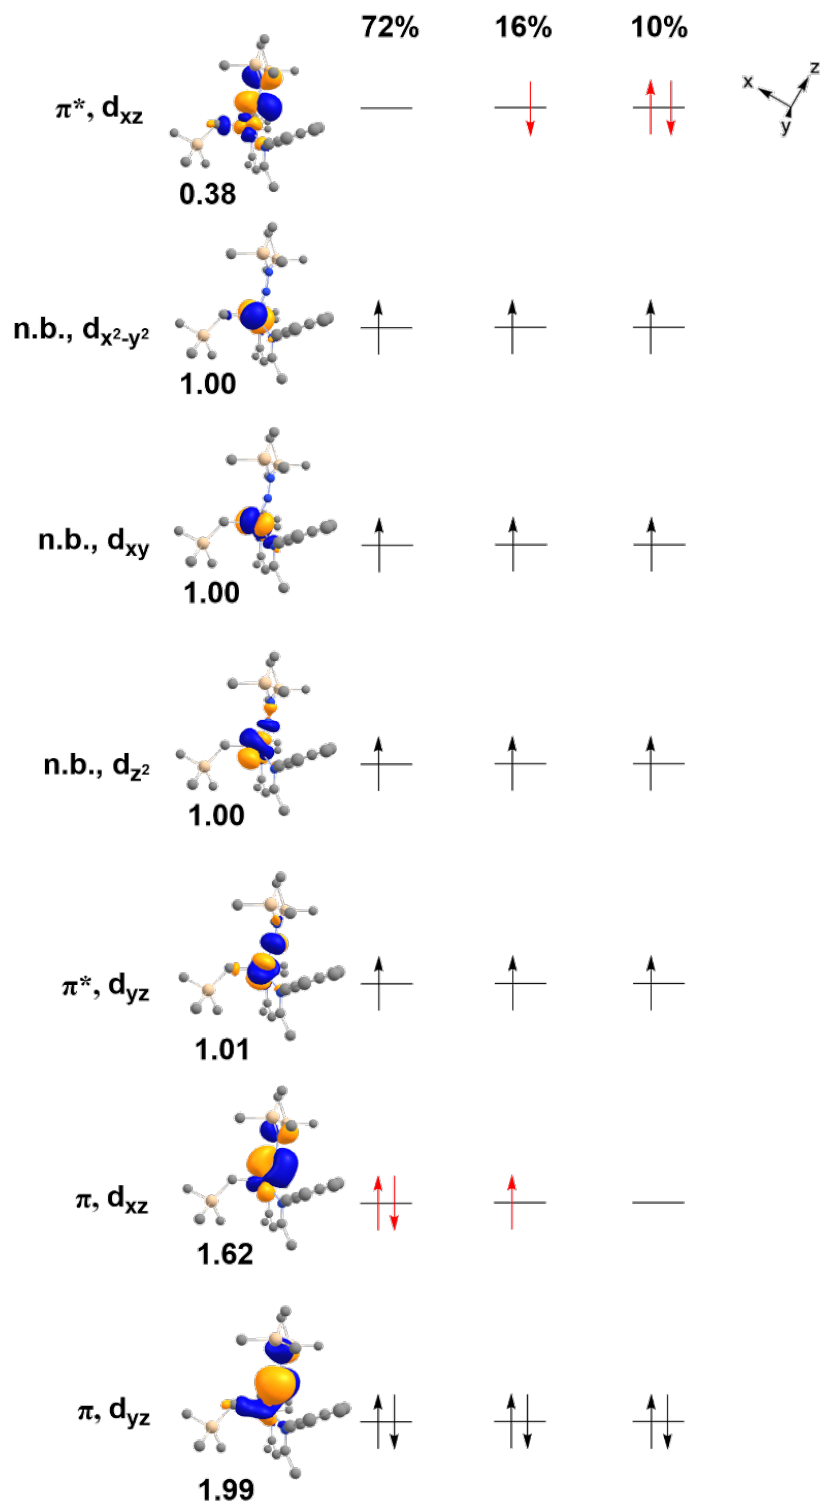

**Figure S71.** Plots of key frontier orbitals from the CASSCF(8,7) calculations on quintet **7a**, along with the occupation numbers of correlated orbitals in the top three configurations.

Atomic coordinates of the optimized structure of **7a** ( $S = 2$ )

|    |                   |                   |                   |
|----|-------------------|-------------------|-------------------|
| Fe | 6.14975634046805  | 7.28191140615222  | 14.69290731168636 |
| Si | 4.55759919836630  | 4.50397051253663  | 17.19289914659202 |
| Si | 5.88576929119330  | 6.46939070356343  | 19.05226436405086 |
| Si | 3.78212448115726  | 8.42057050259401  | 12.32194951521427 |
| N  | 6.07868528190991  | 6.58217436695021  | 16.31691727714335 |
| N  | 5.60703057975934  | 5.96038579739666  | 17.34708205333941 |
| N  | 7.47032159990921  | 6.32929907831148  | 13.47026718673451 |
| N  | 7.23416818604997  | 9.01154395901461  | 14.70600007754025 |
| C  | 8.21871445625720  | 10.79950806699117 | 13.34776498592620 |
| H  | 8.80703370113272  | 11.20004791580857 | 14.17070502855379 |
| H  | 7.30905547770071  | 11.40141069995987 | 13.28867705799551 |
| H  | 8.77648486594074  | 10.91942371223113 | 12.42216429604050 |
| C  | 7.84605572370108  | 9.35490835271089  | 13.57807003678211 |
| C  | 8.17476163624739  | 8.44867296506037  | 12.55932710049112 |
| H  | 8.65236007961213  | 8.88397354748371  | 11.69449972613551 |
| C  | 8.11347479243200  | 7.04229068466203  | 12.55765976828127 |
| C  | 8.84106011748391  | 6.34982538301311  | 11.42970733496456 |
| H  | 9.32069300244817  | 5.43345698198728  | 11.76794642786030 |
| H  | 9.58885000063912  | 7.00639634944964  | 10.99088572066432 |
| H  | 8.12961775944599  | 6.07400702136843  | 10.64877480958236 |
| C  | 7.27806199088506  | 9.89459693785237  | 15.82434869003840 |
| C  | 8.46040562648152  | 9.96430824216270  | 16.59075180202407 |
| C  | 8.50976763029806  | 10.83917994483635 | 17.67324599900125 |
| H  | 9.41764168665058  | 10.90591472949785 | 18.25970498539981 |
| C  | 7.41802240223039  | 11.62016374355878 | 18.01984419960034 |
| H  | 7.47472142292096  | 12.29494948831941 | 18.86488679228584 |
| C  | 6.24958520502809  | 11.51564532022734 | 17.28433850124937 |
| H  | 5.38968957746402  | 12.11108403949954 | 17.56447441004447 |
| C  | 6.15583705111409  | 10.65989645682398 | 16.18792385849271 |
| C  | 9.67109506638143  | 9.09721521784792  | 16.29137313299279 |
| H  | 9.41697971848833  | 8.44226558996031  | 15.46037149989131 |
| C  | 10.00164041648972 | 8.20871473637747  | 17.49412559527727 |
| H  | 10.25407369183973 | 8.80442181107647  | 18.37337261139907 |
| H  | 10.85380479109300 | 7.56519313910246  | 17.27186013759689 |
| H  | 9.15124592414877  | 7.57740016030250  | 17.74618411117786 |
| C  | 10.89863311901950 | 9.92014090539386  | 15.88115814023920 |
| H  | 10.70282494889146 | 10.52276804072679 | 14.99405512063955 |
| H  | 11.73823478492509 | 9.25787729762152  | 15.65812432983007 |
| H  | 11.20721229814104 | 10.59360174140336 | 16.68384505461473 |
| C  | 4.84829417881328  | 10.58346705646871 | 15.42764791358540 |
| H  | 4.99298438722279  | 9.89393938142199  | 14.60065618182840 |
| C  | 3.72781739056518  | 10.02105402652801 | 16.31053570381249 |
| H  | 3.53808715074633  | 10.67299656846374 | 17.16599511146023 |
| H  | 3.98975585773452  | 9.03278370842853  | 16.68918517136276 |
| H  | 2.80083774392604  | 9.93155628545505  | 15.74143687657726 |

|   |                   |                   |                   |
|---|-------------------|-------------------|-------------------|
| C | 4.44988870429490  | 11.94126776357914 | 14.83855332004483 |
| H | 3.55063668928955  | 11.84093443500449 | 14.22773313080271 |
| H | 5.24407988564822  | 12.34726363325323 | 14.20966600580999 |
| H | 4.24161734406878  | 12.66999875590693 | 15.62495964096123 |
| C | 7.63466832785539  | 4.91120731313182  | 13.52522241963713 |
| C | 8.59195861487968  | 4.38258300845809  | 14.41563313051496 |
| C | 8.80094722258367  | 3.00648581707792  | 14.43513176747858 |
| H | 9.54526754116028  | 2.58956417087868  | 15.09945287577627 |
| C | 8.06681370583667  | 2.15457087959948  | 13.62347910598671 |
| H | 8.24661000807115  | 1.08695497378963  | 13.64910889945779 |
| C | 7.08572049723024  | 2.67886163608347  | 12.80125196491887 |
| H | 6.48794652723946  | 2.01133646254055  | 12.19372760344572 |
| C | 6.84350088358936  | 4.05179566488564  | 12.74253587778327 |
| C | 9.39654174420405  | 5.28793938857464  | 15.32971146007295 |
| H | 8.79781274441918  | 6.18316719327476  | 15.49795738039753 |
| C | 9.66280372865144  | 4.64786550041972  | 16.69454430411954 |
| H | 8.73469886376649  | 4.30202577474977  | 17.15166200824522 |
| H | 10.12011866881958 | 5.37321549824402  | 17.36608161055679 |
| H | 10.34487330507640 | 3.79871785557032  | 16.62162359931159 |
| C | 10.71003047197708 | 5.72182306884492  | 14.66491359330801 |
| H | 11.32483495490344 | 4.85045232618245  | 14.42599187818887 |
| H | 11.28408924340621 | 6.36885527132285  | 15.33077739890881 |
| H | 10.52771267773203 | 6.27099069331871  | 13.74148612172818 |
| C | 5.70686544562645  | 4.55164905559246  | 11.87319733954496 |
| H | 5.68479288648957  | 5.63705905039883  | 11.94601255519156 |
| C | 4.36660585240857  | 4.01467646442263  | 12.39540495952714 |
| H | 4.32573091521626  | 2.92672587121836  | 12.30983126677727 |
| H | 3.53640553380024  | 4.42859694029832  | 11.82195454608831 |
| H | 4.21898480348802  | 4.27152655274489  | 13.44366571181592 |
| C | 5.88208423578739  | 4.17290851312110  | 10.39762833702495 |
| H | 6.83540452880182  | 4.52224994476405  | 9.99986340385794  |
| H | 5.08145435000118  | 4.61023210335027  | 9.79816578516201  |
| H | 5.84414478041149  | 3.08976822035448  | 10.26398744592203 |
| C | 4.35814929730328  | 4.15476221429760  | 19.03557822908775 |
| H | 3.42201209823178  | 3.63442445313984  | 19.25444226414653 |
| H | 5.16464821048687  | 3.48973486456712  | 19.35866945567641 |
| C | 4.45046023775732  | 5.50712227850557  | 19.79824097872708 |
| H | 4.55469610374276  | 5.35466743201238  | 20.87549794239919 |
| H | 3.53083461982475  | 6.08145464111089  | 19.64912131022663 |
| C | 5.45730987075662  | 3.18756305638802  | 16.23534425844540 |
| H | 4.82492453867241  | 2.30962900202030  | 16.08290235014054 |
| H | 6.35887622623630  | 2.87318379076533  | 16.76388547331815 |
| H | 5.75996305414928  | 3.55882187929976  | 15.25598322435458 |
| C | 2.95137878829265  | 5.00704740890885  | 16.38777845163796 |
| H | 2.43511546315005  | 5.75642465258531  | 16.99170234206321 |
| H | 2.29115754718432  | 4.14326431917188  | 16.27576695673443 |

|   |                  |                   |                   |
|---|------------------|-------------------|-------------------|
| H | 3.12864421076530 | 5.43541390776234  | 15.40143721501159 |
| C | 7.51411925840611 | 5.78055315197824  | 19.66100330483008 |
| H | 7.54769762294050 | 4.69549032230871  | 19.54463545901853 |
| H | 7.64365784150025 | 6.01203376661956  | 20.72176677578517 |
| H | 8.36002022885985 | 6.20261591713433  | 19.11942002874925 |
| C | 5.82485135571224 | 8.32061827440845  | 19.19009255798129 |
| H | 6.55638780116301 | 8.77959053852995  | 18.52335971705647 |
| H | 6.05377000406584 | 8.63774359106707  | 20.21035316262970 |
| H | 4.84037674531544 | 8.70624389222230  | 18.92345364853455 |
| C | 4.27237743312655 | 7.45109788904338  | 13.83984182650616 |
| H | 3.98036969021216 | 6.41165871848801  | 13.65839476212125 |
| H | 3.64110608564235 | 7.79058418513078  | 14.66716139888232 |
| C | 2.09898637695297 | 9.23280815945281  | 12.61050496420924 |
| H | 1.76119709389174 | 9.77328817297986  | 11.72166540413785 |
| H | 2.13995264351590 | 9.94569370204107  | 13.43767289437726 |
| H | 1.34209712112643 | 8.48366832302903  | 12.85790199216187 |
| C | 4.95097872855761 | 9.78980594214441  | 11.76278266548210 |
| H | 5.92717636648895 | 9.38368205211248  | 11.49534134548670 |
| H | 5.10527072569436 | 10.56042158694764 | 12.51676900335971 |
| H | 4.52924748241180 | 10.27381766164785 | 10.87688450095627 |
| C | 3.59897962662767 | 7.30672484911987  | 10.80810700863313 |
| H | 4.55956980389038 | 6.89888206163854  | 10.48850097619572 |
| H | 3.19268612239011 | 7.88503308595571  | 9.97355293526583  |
| H | 2.92306225486240 | 6.47002087790136  | 10.99529661129281 |

Atomic coordinates of the optimized structure of **7b** ( $S = 1$ )

|    |                   |                   |                   |
|----|-------------------|-------------------|-------------------|
| Fe | 6.55554711535792  | 7.15188362495727  | 14.81328469704951 |
| Si | 4.37179993099119  | 4.86810194480583  | 17.21590404789410 |
| Si | 5.89701222531039  | 6.63806618222308  | 19.10624181124444 |
| N  | 6.21730418139824  | 6.84849406636859  | 16.46020702541862 |
| N  | 5.56426727541311  | 6.19768697093522  | 17.39577039710260 |
| N  | 7.70827623315142  | 6.40320311975524  | 13.33130650832411 |
| N  | 7.30061448981514  | 9.01101016261967  | 14.55112794340397 |
| C  | 8.20593897972830  | 10.87585026850610 | 13.23703113056351 |
| H  | 7.28654969331081  | 11.44661640355537 | 13.37462378101457 |
| H  | 8.58900979545864  | 11.05482391114590 | 12.23462017015381 |
| H  | 8.92805657438445  | 11.26145357307524 | 13.95766275556390 |
| C  | 7.94307115084584  | 9.40393252714096  | 13.45412670342887 |
| C  | 8.44498589374560  | 8.52522111106225  | 12.49055958179177 |
| H  | 9.00117881859746  | 8.98039817142420  | 11.68327556654406 |
| C  | 8.46092914966555  | 7.12020813341656  | 12.51414757922074 |
| C  | 9.42512298632669  | 6.46837172621792  | 11.54884161067089 |
| H  | 10.43260282168759 | 6.84458011916548  | 11.73316358243209 |
| H  | 9.16451596543484  | 6.73077019339345  | 10.52228207619720 |
| H  | 9.43666430228969  | 5.38670130139648  | 11.63929745595431 |
| C  | 7.24342201778281  | 9.92102142206590  | 15.65013741623720 |

|   |                   |                   |                   |
|---|-------------------|-------------------|-------------------|
| C | 8.39868325744983  | 10.08153901185962 | 16.44422548461618 |
| C | 8.35955885091624  | 10.96799534964855 | 17.51700029536274 |
| H | 9.24054107410965  | 11.09344107488159 | 18.13398203275783 |
| C | 7.21055116329446  | 11.68641364025463 | 17.81397041013158 |
| H | 7.19736375900691  | 12.37530148048136 | 18.64951472857553 |
| C | 6.07474245235143  | 11.49836548372087 | 17.04454999939959 |
| H | 5.17099949857480  | 12.04241998854029 | 17.28909763177440 |
| C | 6.06566092804280  | 10.61581263851734 | 15.96452563932502 |
| C | 9.66108426261622  | 9.27303399477287  | 16.19610742676122 |
| H | 9.54626540094827  | 8.74582118123145  | 15.25156876774238 |
| C | 9.82287313912534  | 8.21066874606149  | 17.28921119436732 |
| H | 9.94864484663376  | 8.67486470036142  | 18.27023726896409 |
| H | 10.69654823481495 | 7.58500789066017  | 17.09418624603488 |
| H | 8.94208361159281  | 7.57130444100891  | 17.32583182866778 |
| C | 10.91743384015769 | 10.14312534964472 | 16.08666848803068 |
| H | 10.81568708529617 | 10.89467046883789 | 15.30172261915526 |
| H | 11.78442181365596 | 9.52218994864916  | 15.84980902078307 |
| H | 11.12974209216963 | 10.66360469224668 | 17.02284721995206 |
| C | 4.78417985359390  | 10.41423689925701 | 15.18365225850699 |
| H | 4.99836592655832  | 9.74047403077002  | 14.35845617920691 |
| C | 3.72588709259459  | 9.74562827638590  | 16.07071652469963 |
| H | 3.51399425478153  | 10.35397623698837 | 16.95318587059846 |
| H | 4.07116718792501  | 8.76723640753302  | 16.40656208067916 |
| H | 2.79479099404490  | 9.61098463035529  | 15.52028538000648 |
| C | 4.25619696754023  | 11.72027229286478 | 14.58144741982833 |
| H | 3.36973955982845  | 11.52142267731655 | 13.97636322446330 |
| H | 5.00546511329570  | 12.18748238723859 | 13.93928333623097 |
| H | 3.98305116573977  | 12.44054650825221 | 15.35617400026270 |
| C | 7.75306733219918  | 4.97426078670308  | 13.32582666650914 |
| C | 8.48484242406500  | 4.32229165349104  | 14.33962756293126 |
| C | 8.47501044902228  | 2.93111561434967  | 14.38979240207874 |
| H | 9.04365660392786  | 2.42361367353585  | 15.15778678021022 |
| C | 7.75318053147011  | 2.18327881305679  | 13.47309066332288 |
| H | 7.75038573016138  | 1.10190663167086  | 13.53102361886566 |
| C | 7.04298422229308  | 2.83117275502762  | 12.47668788512260 |
| H | 6.49078272885155  | 2.24575843199721  | 11.75266686767507 |
| C | 7.03030523749080  | 4.22224721992393  | 12.37434313170209 |
| C | 9.33025094573780  | 5.09780855526754  | 15.33194881583463 |
| H | 9.00827192475262  | 6.13734241246770  | 15.30199530429184 |
| C | 9.14427850374319  | 4.60743166892142  | 16.76832552276327 |
| H | 8.09487156250364  | 4.65267491348669  | 17.05763688773430 |
| H | 9.71103786214737  | 5.23494385912349  | 17.45604106686299 |
| H | 9.49284486181636  | 3.58106232989602  | 16.89817489744775 |
| C | 10.80832376904186 | 5.06714949676559  | 14.92073940220040 |
| H | 11.19748011398931 | 4.04625166828276  | 14.94385863695580 |
| H | 11.40774132425473 | 5.67540097957777  | 15.60195013490373 |

|   |                   |                  |                   |
|---|-------------------|------------------|-------------------|
| H | 10.94466621278719 | 5.45406690068881 | 13.90980965535818 |
| C | 6.28493395217367  | 4.85137525874202 | 11.20820825293275 |
| H | 6.30200014244495  | 5.92957909988865 | 11.34233560306552 |
| C | 4.81576034670020  | 4.41457547971750 | 11.12693268527503 |
| H | 4.73318237712229  | 3.34984209987421 | 10.89919967134105 |
| H | 4.30974715624773  | 4.96471706989885 | 10.33118908673790 |
| H | 4.27921879123533  | 4.60158794995366 | 12.05571724680222 |
| C | 6.97547023875148  | 4.53161156828903 | 9.87246221012832  |
| H | 8.02395782789364  | 4.82356548855369 | 9.87557353549712  |
| H | 6.47648649885724  | 5.05755786195899 | 9.05539950795758  |
| H | 6.92709629474420  | 3.46108583223759 | 9.66066974130214  |
| C | 4.38415337654552  | 4.33231130069710 | 19.02092529152714 |
| H | 3.49115740657005  | 3.75865698063380 | 19.28271186375243 |
| H | 5.24176464391116  | 3.67526673073715 | 19.19471163596622 |
| C | 4.51880655929932  | 5.61712101185307 | 19.88065734768413 |
| H | 4.71797961253807  | 5.38496030588609 | 20.93013091302079 |
| H | 3.58451703502316  | 6.18581086174644 | 19.85551953998291 |
| C | 5.01550049335455  | 3.59496539289694 | 16.01769809315824 |
| H | 4.31192101643930  | 2.76217453897084 | 15.93687730532334 |
| H | 5.97593455259563  | 3.19993064323733 | 16.35173472122232 |
| H | 5.15835228274750  | 4.01117538648270 | 15.02081149752130 |
| C | 2.64830619033011  | 5.47013303856956 | 16.77687914150271 |
| H | 2.47005813163888  | 6.46843135299415 | 17.18155010665443 |
| H | 1.91165307288245  | 4.79285382593211 | 17.21828835383706 |
| H | 2.46828336069182  | 5.50323960903967 | 15.70277212534495 |
| C | 7.56256126755463  | 6.02708599411512 | 19.69217652440868 |
| H | 7.64915095013217  | 4.94440078137264 | 19.58701862275953 |
| H | 7.68018509238945  | 6.27586132236917 | 20.75081041553799 |
| H | 8.38293554865294  | 6.48994522616301 | 19.14594316487962 |
| C | 5.75942664876177  | 8.48312672827154 | 19.29035020083212 |
| H | 6.49237754000050  | 8.98692861143206 | 18.65848957575396 |
| H | 5.94031712317067  | 8.78534019613765 | 20.32496018014637 |
| H | 4.76944231309707  | 8.83496395017706 | 18.99611122260129 |
| C | 4.78143200379876  | 6.60487030069407 | 14.02547493518718 |
| H | 5.06691991626136  | 5.68054167785917 | 13.52845907705391 |
| H | 4.05483077995691  | 6.38141002656614 | 14.79542323060497 |
| C | 4.23447279153829  | 7.61902749029854 | 13.09231603335165 |
| C | 4.98415685201778  | 8.17142082217607 | 12.04511942799116 |
| C | 2.91732491948065  | 8.07218517708190 | 13.24842613751038 |
| C | 4.44743649442681  | 9.13619542011858 | 11.20462853816537 |
| C | 2.37485580342441  | 9.03307667377873 | 12.40623532615678 |
| C | 3.13836028374748  | 9.57475459519374 | 11.37791207497251 |
| H | 6.01250353100534  | 7.87571626600865 | 11.90948031418292 |
| H | 2.31509349137168  | 7.66161244526870 | 14.04931469324546 |
| H | 5.05953783292756  | 9.55314602287807 | 10.41382635400626 |
| H | 1.35376967367766  | 9.36302156223460 | 12.55579953655545 |

H 2.72103619024986 10.33035449420034 10.72438916467603

Atomic coordinates of the optimized structure of **7b** ( $S = 2$ )

|    |                   |                   |                   |
|----|-------------------|-------------------|-------------------|
| Fe | 6.37660110739378  | 7.21852381430866  | 14.77171292895447 |
| Si | 5.03909789887598  | 4.20495662122528  | 17.33636244748605 |
| Si | 5.21145221812418  | 6.82927131421234  | 18.80208865990971 |
| N  | 6.26783087401309  | 6.43328906073313  | 16.32866473193725 |
| N  | 5.66960738318425  | 5.88710278864666  | 17.34145224258016 |
| N  | 7.59573225932146  | 6.34505259082147  | 13.37594640448937 |
| N  | 7.36820380112614  | 9.00083702156295  | 14.72957325709037 |
| C  | 8.73038614083564  | 10.71302693689540 | 13.59894680946320 |
| H  | 8.22197705410914  | 11.44605384306179 | 14.21815356578768 |
| H  | 8.75055911170506  | 11.06296300710350 | 12.56752514805322 |
| H  | 9.76419001001084  | 10.64388460839726 | 13.94287882754294 |
| C  | 8.08418718757377  | 9.34820919283937  | 13.67076265934240 |
| C  | 8.36597431125181  | 8.49519648427536  | 12.59156594907242 |
| H  | 8.90382840954892  | 8.95783255197907  | 11.77654539755137 |
| C  | 8.24293041787480  | 7.10031508780486  | 12.49752852636445 |
| C  | 8.92540654449990  | 6.47868252686619  | 11.29896536329779 |
| H  | 9.13513938242016  | 5.42291280034732  | 11.44387565121830 |
| H  | 9.85421028514184  | 7.00083112847387  | 11.07542779261217 |
| H  | 8.27553286920852  | 6.57652283287096  | 10.42684559420577 |
| C  | 7.35223831270096  | 9.83555646761413  | 15.88596091571134 |
| C  | 8.43865278348200  | 9.79542495614112  | 16.77794966248143 |
| C  | 8.38952187737842  | 10.58146331168781 | 17.92878242816392 |
| H  | 9.21750269503845  | 10.55333704747157 | 18.62613652408568 |
| C  | 7.30068091103140  | 11.39288143183002 | 18.19604395748928 |
| H  | 7.27902615903436  | 12.00014624656611 | 19.09251846663234 |
| C  | 6.23384028952061  | 11.42319205038732 | 17.30866385223813 |
| H  | 5.38533426573110  | 12.05454883331044 | 17.53019286899097 |
| C  | 6.22939139393576  | 10.64839650237529 | 16.15103556010607 |
| C  | 9.65366193366700  | 8.91562075732873  | 16.54007793388335 |
| H  | 9.54451865904139  | 8.43880556862923  | 15.56761102598009 |
| C  | 9.74008498314160  | 7.80111998730500  | 17.58736240860135 |
| H  | 9.79878472723467  | 8.21513850991779  | 18.59597943381025 |
| H  | 10.63451149619137 | 7.19912212731291  | 17.42126500553872 |
| H  | 8.87022000000358  | 7.14647323944004  | 17.53829429792418 |
| C  | 10.95666299910889 | 9.72629105782363  | 16.52076092102756 |
| H  | 10.91070769650180 | 10.54414992221803 | 15.80089646807667 |
| H  | 11.79644522483685 | 9.08155304291867  | 16.25228227082210 |
| H  | 11.17018693747888 | 10.15780747808184 | 17.50099238028709 |
| C  | 5.04697641879134  | 10.68335198969490 | 15.19673040885923 |
| H  | 4.86488177414787  | 9.65681321851885  | 14.88035703654723 |
| C  | 3.75456352314540  | 11.19893055207868 | 15.83197285455360 |
| H  | 3.81552005626225  | 12.26598301968043 | 16.05949858375604 |
| H  | 3.50727833347199  | 10.66943014153799 | 16.75238151682355 |

|   |                   |                   |                   |
|---|-------------------|-------------------|-------------------|
| H | 2.93174991618048  | 11.06193168028995 | 15.13019902695378 |
| C | 5.34006654575135  | 11.49204657181460 | 13.92502243874615 |
| H | 4.44812872743197  | 11.53078223612734 | 13.29880788899030 |
| H | 6.13175591663524  | 11.04310485146104 | 13.33260777146557 |
| H | 5.63123357749848  | 12.51488905883512 | 14.17820091458005 |
| C | 7.72602423991152  | 4.92240431172670  | 13.33353664818818 |
| C | 8.72748225809523  | 4.32155790779570  | 14.12682304825899 |
| C | 8.89703287396962  | 2.94191512441222  | 14.05522967985882 |
| H | 9.66766325924401  | 2.46766092179707  | 14.64639901927780 |
| C | 8.08201179719563  | 2.15498388293280  | 13.25438927451841 |
| H | 8.22844830099652  | 1.08269550012062  | 13.21535305078736 |
| C | 7.06846776399135  | 2.74885015446650  | 12.52379155418880 |
| H | 6.42011967116458  | 2.13294984343473  | 11.91349031929739 |
| C | 6.86934296380939  | 4.12997857881560  | 12.54703217994409 |
| C | 9.61048631724007  | 5.15733531888146  | 15.03814046536482 |
| H | 9.01092083516817  | 6.00812135886140  | 15.36302138081879 |
| C | 10.05432202095199 | 4.40143197074930  | 16.29314264502660 |
| H | 9.20124387021763  | 3.98834453500488  | 16.83176092380087 |
| H | 10.58317054696106 | 5.07668994408793  | 16.96496333549011 |
| H | 10.73605484359778 | 3.58222916546160  | 16.05640546924405 |
| C | 10.83789876427492 | 5.70927735314866  | 14.29948949677268 |
| H | 11.44703205710564 | 4.89263998041187  | 13.90397856570085 |
| H | 11.45781572651592 | 6.29477222783587  | 14.98250486246538 |
| H | 10.55585908163085 | 6.35605955787026  | 13.47091491276011 |
| C | 5.74864387499713  | 4.71594219445965  | 11.70980206537476 |
| H | 5.69227594725898  | 5.77745835928510  | 11.93339855393016 |
| C | 4.39106905144376  | 4.08970169799270  | 12.05651768902347 |
| H | 4.33716293173116  | 3.05293605479864  | 11.71756684600953 |
| H | 3.58547721166052  | 4.64377266352100  | 11.57069620621114 |
| H | 4.20785110571982  | 4.09630052168175  | 13.13088063606157 |
| C | 6.01305185683580  | 4.56823687255111  | 10.20505096325915 |
| H | 6.96295856080958  | 5.01449390605223  | 9.91583949647107  |
| H | 5.21916323628111  | 5.05429359099118  | 9.63339608976971  |
| H | 6.03826495343909  | 3.51460425903967  | 9.91767008171468  |
| C | 4.75309725263424  | 4.08154030274671  | 19.19175835689499 |
| H | 4.06204473044266  | 3.28041761963392  | 19.46558327755300 |
| H | 5.70981216131283  | 3.84660261738636  | 19.66904769801235 |
| C | 4.24367562510006  | 5.46659417598464  | 19.68089486426209 |
| H | 4.30824244638395  | 5.55546253520605  | 20.76853485105682 |
| H | 3.18584407583201  | 5.58026920358070  | 19.42529081729721 |
| C | 6.27896610610983  | 3.02526775393829  | 16.61425988830067 |
| H | 5.87549402649079  | 2.00965794597763  | 16.60617048381522 |
| H | 7.20724048459840  | 3.01945474417142  | 17.18657682438339 |
| H | 6.51770079957720  | 3.29917112617927  | 15.58600864237925 |
| C | 3.43406065469736  | 4.16094289590018  | 16.37793092878993 |
| H | 2.70566692682241  | 4.85792576339042  | 16.79725479461700 |



|   |                  |                   |                   |
|---|------------------|-------------------|-------------------|
| H | 3.00006857918707 | 3.15783810149786  | 16.40053889326256 |
| H | 3.59842194432512 | 4.43593799799906  | 15.33530807197891 |
| C | 6.72988008271683 | 7.39117327218194  | 19.72633223230883 |
| H | 7.40249686845504 | 6.55859787874659  | 19.94093963114195 |
| H | 6.44067102707206 | 7.85125029943599  | 20.67512807947006 |
| H | 7.27583213014607 | 8.13596711924024  | 19.14623234568871 |
| C | 4.18183255674454 | 8.28686398849542  | 18.27535360299202 |
| H | 4.78574069161913 | 8.95656363933653  | 17.66320406824281 |
| H | 3.82755292827761 | 8.85350886434045  | 19.14000376084174 |
| H | 3.31591160921493 | 7.96946006378481  | 17.69155456239771 |
| C | 4.40165567608839 | 7.11264626493473  | 14.16625098329542 |
| H | 4.44195204878454 | 6.10274246169681  | 13.75288757068153 |
| H | 3.73282607130845 | 7.08702526555464  | 15.02686130072462 |
| C | 3.93266689292311 | 8.08354996435559  | 13.14749071798716 |
| C | 4.65904481186672 | 8.34745914316214  | 11.97564634290985 |
| C | 2.73794350079373 | 8.79492784439028  | 13.32789531549956 |
| C | 4.20370573996437 | 9.25263431529886  | 11.02759614750104 |
| C | 2.28258519044968 | 9.70787445253309  | 12.38546989564162 |
| C | 3.00980924526009 | 9.94041671444283  | 11.22311351090080 |
| H | 5.61046862725612 | 7.85783947077433  | 11.81656705481547 |
| H | 2.15851963833819 | 8.62095267740934  | 14.22714084085478 |
| H | 4.79308031798094 | 9.43244424264666  | 10.13626179591084 |
| H | 1.35437942543170 | 10.23949893118338 | 12.55934448579666 |
| H | 2.65776155897598 | 10.65165471244564 | 10.48671567010910 |

Atomic coordinates of the optimized structure of **8** ( $S = 1/2$ ) using BP86

|    |                  |                   |                   |
|----|------------------|-------------------|-------------------|
| Fe | 3.89519131489873 | 15.06709620413389 | 11.25859593882010 |
| Si | 3.80250664729205 | 13.59054215067689 | 15.19771026720429 |
| Si | 3.56285977137170 | 16.60832506788962 | 15.14023710221821 |
| N  | 3.82729590803603 | 15.07324843475921 | 12.88400404053038 |
| N  | 4.12761911837188 | 16.40818193761775 | 9.97255305485637  |
| N  | 3.77054128020090 | 13.71741092848608 | 9.96935809507577  |
| N  | 3.76876412171365 | 15.08688893274013 | 14.19659429531699 |
| C  | 4.21239415968312 | 16.28829371097367 | 8.63499386224348  |
| C  | 3.83166069267565 | 13.82038076445669 | 8.62929900145897  |
| C  | 2.33281027002284 | 12.01566646687095 | 10.99283876770495 |
| C  | 2.22552351859220 | 10.81826547709176 | 11.71072887532208 |
| H  | 1.24210360135132 | 10.48189072771587 | 12.04536343909872 |
| C  | 3.61731476943203 | 12.43731307696031 | 10.58724948889967 |
| C  | 1.09732882762468 | 12.83958024880247 | 10.66782574369448 |
| H  | 1.42591353707956 | 13.67752199861845 | 10.03662959629519 |
| C  | 5.42399992460204 | 18.13448599442102 | 11.13497112567666 |
| C  | 4.76769624617137 | 11.65290318065726 | 10.83648347132745 |
| C  | 7.00977696265886 | 10.96393267980717 | 9.84864643502171  |
| H  | 7.30371250827342 | 10.28285981080671 | 10.66115312684603 |
| H  | 7.93366273583318 | 11.36050019221209 | 9.40289624777824  |

|   |                   |                   |                   |
|---|-------------------|-------------------|-------------------|
| H | 6.48568275301220  | 10.37203564967851 | 9.08403012667885  |
| C | 6.13615334852946  | 12.11621387488331 | 10.35872412725885 |
| H | 5.96895640857977  | 12.80236090213778 | 9.51593870700324  |
| C | 4.28394651758081  | 20.11193341474906 | 11.97653958068906 |
| H | 4.31183190074799  | 21.04909076868174 | 12.53482576538429 |
| C | 4.20031465177804  | 17.69903373302585 | 10.58308743272275 |
| C | 4.49027776934533  | 17.51444952044328 | 7.80138220318146  |
| H | 3.69179495354793  | 18.26465889980842 | 7.90432057958719  |
| H | 4.58041209469608  | 17.24514992535597 | 6.74273619816910  |
| H | 5.42273371276462  | 18.00198992673665 | 8.12186155658188  |
| C | 4.05775986083458  | 15.05025370139116 | 7.99630388950601  |
| H | 4.12053233636015  | 15.04257862069776 | 6.90949841744807  |
| C | 1.72710201091134  | 18.00286046480050 | 10.04406267050321 |
| H | 1.99656711744478  | 17.33465592603266 | 9.21319024519736  |
| C | 5.44026713594845  | 19.34472265206423 | 11.83929167652318 |
| H | 6.37490549336547  | 19.69153797193438 | 12.28488720960893 |
| C | 3.02656790959751  | 18.48431250237800 | 10.67276537646820 |
| C | 6.69413997570379  | 17.31681443529049 | 10.97127342219342 |
| H | 6.44645410200406  | 16.45724670367068 | 10.33168156260152 |
| C | 3.35339249207918  | 10.05244486807349 | 12.00516585407132 |
| H | 3.25220135552587  | 9.12601013509093  | 12.57285114889772 |
| C | 4.61077632507352  | 10.46392100955553 | 11.55807102046451 |
| H | 5.48497185747490  | 9.84911252512670  | 11.77714849695591 |
| C | 3.65947231409461  | 12.58082073010674 | 7.78747061404355  |
| H | 4.43364788638556  | 11.83286836355485 | 8.01496799734930  |
| H | 3.71539475919931  | 12.82982365831943 | 6.72155922022483  |
| H | 2.69036232339063  | 12.09927837390910 | 7.98671593232968  |
| C | 3.09251942362863  | 19.68753175115071 | 11.38434213110405 |
| H | 2.19738356844687  | 20.30343205699891 | 11.48140078451025 |
| C | 2.20073419396326  | 12.63907246825377 | 15.03019275115060 |
| H | 1.32651954988375  | 13.27516538351025 | 15.22666830789186 |
| H | 2.18466394674680  | 11.79681865711454 | 15.73899353429589 |
| H | 2.11148100267941  | 12.22858660398678 | 14.01523096115657 |
| C | 0.06754872291697  | 12.02143864948219 | 9.87374800503098  |
| H | 0.51074901377232  | 11.59945537283043 | 8.96004604374544  |
| H | -0.78307838121922 | 12.65512278103022 | 9.58169600721920  |
| H | -0.32646500127184 | 11.18627250273047 | 10.47203401520707 |
| C | 0.87905806392041  | 19.14080021380865 | 9.46496511200424  |
| H | 0.48495801497846  | 19.79877787826878 | 10.25360122358143 |
| H | 0.01594454374025  | 18.72627789270318 | 8.92401090471621  |
| H | 1.45824600635154  | 19.76053640819136 | 8.76481573113425  |
| C | 6.86260431518189  | 12.92170442485565 | 11.44781094398909 |
| H | 6.24244648235974  | 13.76682813682686 | 11.78686461229199 |
| H | 7.81202527206533  | 13.32211034353791 | 11.06175225535332 |
| H | 7.08394304544532  | 12.28895464310094 | 12.31962832043651 |
| C | 3.17424519950906  | 15.78678223010920 | 16.79813574855100 |

|   |                   |                   |                   |
|---|-------------------|-------------------|-------------------|
| H | 3.40115104946704  | 16.44662833102140 | 17.65027954212366 |
| H | 2.09158592374228  | 15.58287395958780 | 16.83795947435403 |
| C | 2.17611180700019  | 17.60974211914899 | 14.39883444586305 |
| H | 2.46106674241880  | 17.95726609763532 | 13.39616760673194 |
| H | 1.96055685987615  | 18.49519115576243 | 15.01551883091179 |
| H | 1.25883063433685  | 17.01173079369599 | 14.31060929094376 |
| C | 7.79827259941228  | 18.12475806000752 | 10.27210959301639 |
| H | 7.45564843562781  | 18.51747788810144 | 9.30385964761894  |
| H | 8.67989647693323  | 17.49144036309256 | 10.09321123670691 |
| H | 8.11972902400023  | 18.97983323780084 | 10.88595366844179 |
| C | 0.47038964873006  | 13.44071133927425 | 11.93382248827031 |
| H | 0.13085714882524  | 12.65118832293422 | 12.62041898019788 |
| H | -0.39801821251526 | 14.06399717676339 | 11.67396821588941 |
| H | 1.19985746814049  | 14.06993190160628 | 12.46250787166954 |
| C | 5.14325545603732  | 17.60831568429763 | 15.19031891710831 |
| H | 5.99651004770588  | 17.00620668554472 | 15.53214014829339 |
| H | 5.02121510861996  | 18.45851539806803 | 15.87932849224676 |
| H | 5.37437477512979  | 18.01068351202208 | 14.19511578469624 |
| C | 3.96930292284464  | 14.45442557862122 | 16.86984341981899 |
| H | 3.62981436582338  | 13.81711708659908 | 17.70153314355231 |
| H | 5.03751529976688  | 14.66092460715844 | 17.04779172849195 |
| C | 5.24640890082042  | 12.51347025912698 | 14.71019818418092 |
| H | 5.09237807398701  | 12.11371917176220 | 13.69815497883310 |
| H | 5.33576342902969  | 11.66083190538745 | 15.40050475837760 |
| H | 6.19084400536784  | 13.07438367884547 | 14.72438765082940 |
| C | 0.91295584412658  | 17.15800980919564 | 11.03732168790347 |
| H | 1.52421930291324  | 16.33202831259179 | 11.43518444282319 |
| H | 0.02772700380470  | 16.72973375513961 | 10.54380838855634 |
| H | 0.57254132633767  | 17.77135714577383 | 11.88431543222777 |
| C | 7.18560934174752  | 16.75478724912105 | 12.31273799258842 |
| H | 7.44964003335225  | 17.56317238078215 | 13.01089756566861 |
| H | 8.07933208400721  | 16.13123920724967 | 12.16187214870340 |
| H | 6.40668880762013  | 16.13465718458601 | 12.77767784195035 |

Atomic coordinates of the optimized structure of **8** ( $S = 3/2$ ) using BP86

|    |                  |                   |                   |
|----|------------------|-------------------|-------------------|
| Fe | 3.87962249111764 | 15.17030839633915 | 11.26052407067998 |
| Si | 4.69236874036455 | 13.85552811456601 | 15.36941454206185 |
| Si | 2.73049580226020 | 16.11708609206801 | 14.92906161412198 |
| N  | 4.04008052230226 | 14.82070119935511 | 12.90526668245444 |
| N  | 4.29601869302481 | 16.46543288855106 | 9.93515761178216  |
| N  | 3.54301415854682 | 13.73069919661349 | 10.03271728851005 |
| N  | 3.83544728047319 | 14.90940191953882 | 14.20502586862365 |
| C  | 4.35587331247366 | 16.25498936036291 | 8.61014867030835  |
| C  | 3.64919761002925 | 13.82693073319473 | 8.69557628421836  |
| C  | 2.07242202814875 | 12.19816262338029 | 11.26031007645703 |
| C  | 1.89760327875584 | 10.96183780935653 | 11.89259259759905 |

|   |                   |                   |                   |
|---|-------------------|-------------------|-------------------|
| H | 0.94475862577639  | 10.73182095140042 | 12.36902719607508 |
| C | 3.32004569918745  | 12.46518158993142 | 10.64719139406600 |
| C | 0.98159260058306  | 13.25685374587185 | 11.26609761034525 |
| H | 1.49370028483702  | 14.20966902407147 | 11.50542198688131 |
| C | 5.68883693898236  | 18.10008119319993 | 11.12010932237395 |
| C | 4.38625031986127  | 11.53763949223582 | 10.71887388976381 |
| C | 6.53948837998210  | 10.70899079575558 | 9.61915112828395  |
| H | 6.80059440179060  | 9.97235149085624  | 10.39350506289445 |
| H | 7.48004165898830  | 11.05443331494481 | 9.16619831603533  |
| H | 5.95493492825103  | 10.19176688316835 | 8.84414982006459  |
| C | 5.77083251416275  | 11.90026860550523 | 10.20157617706993 |
| H | 5.65104955244701  | 12.64051755685571 | 9.39838532210130  |
| C | 4.74359928721930  | 20.26175590945179 | 11.71469088517803 |
| H | 4.84996119059182  | 21.23705821748907 | 12.19228998012623 |
| C | 4.46846621869558  | 17.76407391913051 | 10.49423865549146 |
| C | 4.78866828327262  | 17.38725221108482 | 7.71200244340305  |
| H | 4.08454564225388  | 18.23149801481406 | 7.76439667723838  |
| H | 4.85673338492891  | 17.05374975510684 | 6.67029790202588  |
| H | 5.76883768799778  | 17.77606837236486 | 8.02667316495894  |
| C | 4.03085527814967  | 15.01329693049806 | 8.03899329475156  |
| H | 4.09344617778446  | 14.95569388199267 | 6.95336454645311  |
| C | 2.04451951270923  | 18.24710462963321 | 9.88310580873748  |
| H | 2.25263643538308  | 17.57661245609696 | 9.03589469208070  |
| C | 5.80260866950722  | 19.35713728268508 | 11.72809071378222 |
| H | 6.73872181095639  | 19.62947883715909 | 12.21961264724288 |
| C | 3.37662228022569  | 18.66935826327353 | 10.48213965073977 |
| C | 6.84731804669488  | 17.12074912486641 | 11.16415610691112 |
| H | 6.54637817626661  | 16.23267647382488 | 10.58861221243712 |
| C | 2.92624504987771  | 10.02007306248266 | 11.93771723211525 |
| H | 2.76837007162441  | 9.06235119368825  | 12.43631146164671 |
| C | 4.16273235851724  | 10.31672826319716 | 11.36648063496482 |
| H | 4.97258053615863  | 9.58906310405194  | 11.43287215702001 |
| C | 3.35483870563561  | 12.61377436503294 | 7.84203676652224  |
| H | 4.16946838670390  | 11.87548673070430 | 7.89686521697722  |
| H | 3.23126705000258  | 12.90660941642779 | 6.79283152212974  |
| H | 2.44351433274575  | 12.10310858778939 | 8.18171376566937  |
| C | 3.53995857792638  | 19.91449751231813 | 11.09645599534225 |
| H | 2.71269954287638  | 20.62486801899779 | 11.09985034964225 |
| C | 3.92804547818970  | 12.14704366960721 | 15.27145348543827 |
| H | 2.87301081591247  | 12.17278881201673 | 15.58090608040593 |
| H | 4.45719177953714  | 11.41947093758814 | 15.90447796260694 |
| H | 3.96221740781302  | 11.78765526538699 | 14.23114105611139 |
| C | 0.32032281953869  | 13.42958751619238 | 9.88877607673739  |
| H | 1.05138865577505  | 13.70987161062155 | 9.12165109164878  |
| H | -0.44475247034478 | 14.21939009315864 | 9.93029985835277  |
| H | -0.17004229143702 | 12.49477490489626 | 9.57659745662437  |

|   |                   |                   |                   |
|---|-------------------|-------------------|-------------------|
| C | 1.20452538771263  | 19.41342428739663 | 9.35360029409773  |
| H | 0.85756334239242  | 20.06949188162327 | 10.16570141751228 |
| H | 0.31200494471029  | 19.02761333750783 | 8.84054568427856  |
| H | 1.77224572040888  | 20.02727164857639 | 8.63943200567473  |
| C | 6.57689736323965  | 12.58478597632791 | 11.31996338853151 |
| H | 6.03916345965428  | 13.46282830249216 | 11.70721130897882 |
| H | 7.56119981561282  | 12.91017791028665 | 10.95122905498625 |
| H | 6.73290044464258  | 11.88792202709367 | 12.15763261039111 |
| C | 2.90369091858114  | 15.55932436881319 | 16.73119538022049 |
| H | 2.77691414385582  | 16.38824330241065 | 17.44526401190695 |
| H | 2.07815670935777  | 14.85534351050445 | 16.92755182639692 |
| C | 0.98312350457541  | 15.90415768857790 | 14.29243349212937 |
| H | 0.96058985118734  | 15.89717204028753 | 13.19507434780046 |
| H | 0.33768057402737  | 16.72597733046590 | 14.63721787769587 |
| H | 0.55599300448202  | 14.95653365294688 | 14.64751633151650 |
| C | 8.11162228646778  | 17.69902892455247 | 10.51159885154991 |
| H | 7.92000767714358  | 18.00036727971559 | 9.47160321931162  |
| H | 8.91876208813422  | 16.95152673699437 | 10.51026017650765 |
| H | 8.47309795947666  | 18.58281281455841 | 11.05819059292692 |
| C | -0.08605492658157 | 13.02923865619947 | 12.33854844366408 |
| H | -0.70514980942834 | 12.14711425911148 | 12.11392130150331 |
| H | -0.75609597336186 | 13.89899351611420 | 12.38527309031088 |
| H | 0.36162215517636  | 12.88992082293965 | 13.33214944374032 |
| C | 3.40842033228139  | 17.81325881871298 | 14.51700117462307 |
| H | 4.39018091718339  | 17.97149072073824 | 14.98567702112324 |
| H | 2.73294521346009  | 18.61764926205315 | 14.84261078415531 |
| H | 3.54200920920370  | 17.90341664224145 | 13.42797566092828 |
| C | 4.26787100057825  | 14.83776774298921 | 16.93044739422992 |
| H | 4.26578629272383  | 14.21644848117558 | 17.83973681828795 |
| H | 5.06828510056782  | 15.58380928600091 | 17.06728255740106 |
| C | 6.52422873999959  | 13.80118803124735 | 14.99714111322346 |
| H | 6.69743853124008  | 13.43594461797364 | 13.97589378951522 |
| H | 7.04198927458247  | 13.12563231603534 | 15.69457149047035 |
| H | 6.97265642598618  | 14.80042816305813 | 15.08379494512212 |
| C | 1.25011228367763  | 17.42921924478215 | 10.91427427016975 |
| H | 1.84292479229395  | 16.56608909814711 | 11.26478196930394 |
| H | 0.31513572816284  | 17.04252329077488 | 10.48321940834279 |
| H | 1.00676615645125  | 18.04140366302353 | 11.79506742821726 |
| C | 7.11393933802504  | 16.66505590714350 | 12.60712058961652 |
| H | 7.44172979398074  | 17.50839333080467 | 13.23403167408889 |
| H | 7.90028383123575  | 15.89625257555931 | 12.63060929946744 |
| H | 6.20244568486068  | 16.23688321128255 | 13.04594237579030 |

Atomic coordinates of the optimized structure of **8** ( $S = 1/2$ ) using B3LYP

|    |                  |                   |                   |
|----|------------------|-------------------|-------------------|
| Fe | 3.85290792785585 | 15.07035581700189 | 11.30261103027165 |
| Si | 3.65330822974279 | 13.58550546457475 | 15.23833834829781 |

|    |                  |                   |                   |
|----|------------------|-------------------|-------------------|
| Si | 3.63332113743985 | 16.59398837169778 | 15.22608572777022 |
| N  | 3.75821327591165 | 15.07992644139040 | 12.95573417777771 |
| N  | 4.08228335833172 | 16.42827502418382 | 9.97405287343153  |
| N  | 3.78161927371930 | 13.69207957390888 | 9.97571635060082  |
| N  | 3.67911314990739 | 15.08599067538351 | 14.26936186975268 |
| C  | 4.15854771900673 | 16.28817824950064 | 8.65497872579333  |
| C  | 3.85192474039675 | 13.81534372741944 | 8.65442324863575  |
| C  | 2.37475858797173 | 11.91574286159940 | 10.89892549526917 |
| C  | 2.28362175722276 | 10.71263334873422 | 11.59586073218811 |
| H  | 1.30963225724716 | 10.33240221922969 | 11.87740921588365 |
| C  | 3.65165448973614 | 12.39665133949223 | 10.56368416432964 |
| C  | 1.12110018531639 | 12.68378992041104 | 10.51677175005650 |
| H  | 1.42165680621011 | 13.46668498822529 | 9.82109341333572  |
| C  | 5.41534124893458 | 18.18487573539202 | 11.03278907712068 |
| C  | 4.81166902685097 | 11.65804427914833 | 10.85871106911484 |
| C  | 7.07441219672987 | 11.07371622648371 | 9.86147278896057  |
| H  | 7.33869080135607 | 10.31629758039889 | 10.60211812476670 |
| H  | 8.00504673539895 | 11.51003147351120 | 9.49205726642941  |
| H  | 6.57885696347625 | 10.57067500481694 | 9.02854056239518  |
| C  | 6.18695978805690 | 12.16851871029949 | 10.46079395270198 |
| H  | 6.04478551245990 | 12.92702634230938 | 9.69184295572878  |
| C  | 4.30974477525434 | 20.15611319035812 | 11.90149970886688 |
| H  | 4.36006101598738 | 21.09636435506652 | 12.43650307349422 |
| C  | 4.17386427328752 | 17.72812517119264 | 10.55919535898086 |
| C  | 4.38439507954222 | 17.50222351251971 | 7.79030848182737  |
| H  | 3.57144668236763 | 18.22169937834012 | 7.90126805347280  |
| H  | 4.45574453294346 | 17.21809042630252 | 6.74269646246292  |
| H  | 5.30255266140092 | 18.01800034145553 | 8.07649539727075  |
| C  | 4.03676886390296 | 15.04775725212187 | 8.02334667528359  |
| H  | 4.09530478053555 | 15.04022581518193 | 6.94554618794519  |
| C  | 1.66959695632891 | 18.01177812466371 | 10.17759941824437 |
| H  | 1.86878584297890 | 17.18433443141025 | 9.49840874906096  |
| C  | 5.45802106433898 | 19.40074052769937 | 11.71219575087687 |
| H  | 6.40332100794761 | 19.76181811971621 | 12.09789154617869 |
| C  | 3.00642392741197 | 18.49697965488837 | 10.71245265759864 |
| C  | 6.68591602253132 | 17.38177659482159 | 10.81677952593912 |
| H  | 6.43771925392982 | 16.54805811363718 | 10.16065974818149 |
| C  | 3.42044578467160 | 9.99193080105143  | 11.93252721218726 |
| H  | 3.33133152708681 | 9.06173462655619  | 12.47994573713637 |
| C  | 4.67152344607863 | 10.45778498793844 | 11.55181775563487 |
| H  | 5.55231713223035 | 9.88193908173046  | 11.80496512528549 |
| C  | 3.73561483666712 | 12.58623746868320 | 7.78903419929781  |
| H  | 4.54353845760700 | 11.88294850542860 | 7.99922086949392  |
| H  | 3.77138610365698 | 12.85373793815750 | 6.73529633210363  |
| H  | 2.80028363657385 | 12.05944141546147 | 7.98678140278460  |
| C  | 3.09792693827031 | 19.70886937307516 | 11.39322244969458 |

|   |                   |                   |                   |
|---|-------------------|-------------------|-------------------|
| H | 2.20804617889880  | 20.30879681672396 | 11.53539914711856 |
| C | 2.03122118333506  | 12.68384374384450 | 15.03582596287366 |
| H | 1.17844225900085  | 13.34057774164747 | 15.21812730736496 |
| H | 1.97608965041479  | 11.84628063253236 | 15.73672952769738 |
| H | 1.94575144174518  | 12.28221081383864 | 14.02577273791324 |
| C | 0.09967692007386  | 11.79562255138499 | 9.79820830696564  |
| H | 0.54507098629245  | 11.29660202231583 | 8.93518773351291  |
| H | -0.74167578350174 | 12.39768799044252 | 9.44772549285184  |
| H | -0.29992328034073 | 11.02487629496757 | 10.46080531714653 |
| C | 0.93280159401712  | 19.09208022471785 | 9.37974821091584  |
| H | 0.62485261799531  | 19.92511300696476 | 10.01504007038612 |
| H | 0.03174011854518  | 18.67374131728611 | 8.92567513967654  |
| H | 1.56076881535875  | 19.49378018289978 | 8.58209020877235  |
| C | 6.88832630926474  | 12.85542951041958 | 11.63909072528529 |
| H | 6.27566370159709  | 13.66487541615241 | 12.03699560279934 |
| H | 7.84616223009921  | 13.27374745391595 | 11.32073708050228 |
| H | 7.07642318897847  | 12.14378820073155 | 12.44546620879408 |
| C | 3.20536489388255  | 15.80381299143139 | 16.88200826771057 |
| H | 3.51360646811967  | 16.41952447112390 | 17.73117548080722 |
| H | 2.11576033863297  | 15.71626048243471 | 16.94122067061570 |
| C | 2.33391050994034  | 17.76376243458335 | 14.58564180885986 |
| H | 2.61118049047405  | 18.15169772647794 | 13.60559622649958 |
| H | 2.23139909557090  | 18.61362177489346 | 15.26624867485462 |
| H | 1.36275375079094  | 17.27390824894592 | 14.49998125031385 |
| C | 7.77193622174261  | 18.21048397471813 | 10.12046470887864 |
| H | 7.40699923124168  | 18.63667505345806 | 9.18397019756886  |
| H | 8.63849319293120  | 17.58473359996001 | 9.89524876415785  |
| H | 8.11337530654706  | 19.03425467751078 | 10.75115438035386 |
| C | 0.48745012792556  | 13.37398557325999 | 11.73004695372682 |
| H | 0.14547523996565  | 12.63847678823322 | 12.46110370855864 |
| H | -0.37365908786336 | 13.97155725840787 | 11.42188715500682 |
| H | 1.20534889585929  | 14.03349533746703 | 12.21833294030468 |
| C | 5.30193588403161  | 17.43272570238425 | 15.22483131681704 |
| H | 6.10033149612692  | 16.74304143418395 | 15.50518476090486 |
| H | 5.30490823352672  | 18.26767506819613 | 15.93090775029246 |
| H | 5.52398605779226  | 17.82981434400184 | 14.23411045172993 |
| C | 3.84918086508038  | 14.39286909568136 | 16.93034317843146 |
| H | 3.42590256380969  | 13.78194440677218 | 17.73223766612368 |
| H | 4.91987958568261  | 14.48104488955314 | 17.14049385329371 |
| C | 5.06410151890963  | 12.46323685055468 | 14.77169996566109 |
| H | 4.93003732489667  | 12.07468520257395 | 13.76225881314907 |
| H | 5.10744479512890  | 11.61174822317228 | 15.45649825608595 |
| H | 6.02040996865332  | 12.98719895909430 | 14.81479251651695 |
| C | 0.78630472190643  | 17.46145948937595 | 11.30365862233860 |
| H | 1.29837874605247  | 16.66479505139719 | 11.84441151457122 |
| H | -0.14360414923193 | 17.05782471118705 | 10.89588960897855 |

|   |                  |                   |                   |
|---|------------------|-------------------|-------------------|
| H | 0.53252263262176 | 18.24750063787114 | 12.01806826941038 |
| C | 7.21070797007658 | 16.78498031981784 | 12.12723238206327 |
| H | 7.49354975384256 | 17.57122570703574 | 12.83046434127344 |
| H | 8.09214843588431 | 16.16807357556640 | 11.93784517876773 |
| H | 6.45243501485887 | 16.16089443530798 | 12.60010878487278 |

Atomic coordinates of the optimized structure of **8** ( $S = 3/2$ ) using B3LYP

|    |                  |                   |                   |
|----|------------------|-------------------|-------------------|
| Fe | 3.80245126662892 | 15.12325048689403 | 11.31349469290959 |
| Si | 4.36592307010053 | 14.03587065549931 | 15.24117087177812 |
| Si | 2.18991909283582 | 16.10503669361701 | 15.26987921861011 |
| N  | 3.46381158788428 | 15.29566288218039 | 13.00222048821140 |
| N  | 4.31541077675817 | 16.47666860317779 | 9.95448497479784  |
| N  | 3.54349161722513 | 13.67779385552889 | 9.99461903144268  |
| N  | 3.35474209052154 | 15.16418200353560 | 14.30793758936130 |
| C  | 4.27696074072323 | 16.27376263779170 | 8.64338842064507  |
| C  | 3.58496646189635 | 13.83999832170555 | 8.67643468987005  |
| C  | 2.13277614051171 | 11.93348064510780 | 10.98662658901862 |
| C  | 2.04100335481355 | 10.69046963794822 | 11.61187749169789 |
| H  | 1.07709261044106 | 10.34053676534617 | 11.95917254605010 |
| C  | 3.39312762674708 | 12.37537331154332 | 10.55520451324305 |
| C  | 0.89389841721669 | 12.78860071487279 | 10.80501158594197 |
| H  | 1.16213032684051 | 13.61656186739779 | 10.14804506928240 |
| C  | 6.00479386142472 | 17.98439058630920 | 10.87924949906329 |
| C  | 4.54044583394765 | 11.57502180871596 | 10.72795512357016 |
| C  | 6.82856417270279 | 10.97432523614410 | 9.76943200951685  |
| H  | 7.12647053542586 | 10.28407880459373 | 10.56121400899862 |
| H  | 7.74017367512408 | 11.41625292701836 | 9.36197750130265  |
| H  | 6.34788883619334 | 10.39478442217277 | 8.97903415000791  |
| C  | 5.90531654577820 | 12.07800403510399 | 10.28976478407402 |
| H  | 5.75323446446496 | 12.78193416813119 | 9.47179212140722  |
| C  | 5.35964675400394 | 20.19454708651015 | 11.62762848052613 |
| H  | 5.62276960504950 | 21.14296131523718 | 12.07944624088892 |
| C  | 4.68008134516537 | 17.75437985072876 | 10.47312637441071 |
| C  | 4.65098225070156 | 17.40274558453767 | 7.71317272507344  |
| H  | 3.95655161581466 | 18.23854619712521 | 7.81708423077804  |
| H  | 4.64393683745470 | 17.07117774636694 | 6.67752052226117  |
| H  | 5.64301890736976 | 17.78760888429915 | 7.95446610811586  |
| C  | 3.90649082632551 | 15.05396587026984 | 8.05442449473705  |
| H  | 3.89929238327301 | 15.04115620984603 | 6.97504390289818  |
| C  | 2.25062879904658 | 18.48731203401946 | 10.23518846809217 |
| H  | 2.24205351364651 | 17.63132369186111 | 9.56096776973135  |
| C  | 6.32348451100471 | 19.21341433996789 | 11.45400751462013 |
| H  | 7.34060914950171 | 19.40220529603627 | 11.77423847086709 |
| C  | 3.69226823409652 | 18.74419815889292 | 10.63547764709319 |
| C  | 7.07407566699671 | 16.91795448405613 | 10.73555196104984 |
| H  | 6.62585038799101 | 16.06976286335674 | 10.21851969253470 |



|   |                   |                   |                   |
|---|-------------------|-------------------|-------------------|
| C | 3.16122645086178  | 9.89646184135140  | 11.79607861228000 |
| H | 3.07199332792198  | 8.93472681331570  | 12.28571059764682 |
| C | 4.40032708823206  | 10.33885620807834 | 11.35220816949138 |
| H | 5.26979318176506  | 9.71224183621028  | 11.49924257399483 |
| C | 3.29253750428325  | 12.65805340156715 | 7.78442850808749  |
| H | 4.05330615930416  | 11.88331194432290 | 7.90201381894231  |
| H | 3.26501341949322  | 12.95912102949496 | 6.73967458773602  |
| H | 2.33627102058881  | 12.20296718079043 | 8.04735976055903  |
| C | 4.05464288668352  | 19.95530892943190 | 11.21931985420604 |
| H | 3.30589680405576  | 20.72402335951879 | 11.36096004636173 |
| C | 3.92406407333291  | 12.29435079506846 | 14.73423854264651 |
| H | 2.88068029187583  | 12.06900961909311 | 14.96427795223308 |
| H | 4.55344089980893  | 11.55525339072671 | 15.23592593931993 |
| H | 4.05813798924420  | 12.17472219530681 | 13.65700708750185 |
| C | -0.25234627856697 | 12.02231002898779 | 10.13674644667882 |
| H | 0.06117849165855  | 11.59290841175715 | 9.18310066429228  |
| H | -1.09355598541869 | 12.69310767803863 | 9.94883030891216  |
| H | -0.61447767175023 | 11.20775145969765 | 10.76749402550506 |
| C | 1.61710978832123  | 19.66345358796556 | 9.48771304209938  |
| H | 1.50423031198517  | 20.53886058268281 | 10.13044859791700 |
| H | 0.62200890949134  | 19.38728321240683 | 9.13225997259269  |
| H | 2.21796111151896  | 19.95652814977258 | 8.62436579412967  |
| C | 6.57685540363590  | 12.85264809650234 | 11.42964729440591 |
| H | 5.94837866217831  | 13.67745575212504 | 11.77257645415533 |
| H | 7.53239652864799  | 13.27094768421943 | 11.10705813708183 |
| H | 6.75565131351050  | 12.19917073900996 | 12.28648255275718 |
| C | 2.35758026345828  | 15.13564672565605 | 16.87882479907438 |
| H | 2.11503796402993  | 15.73109577397525 | 17.76309431409896 |
| H | 1.62577596262673  | 14.32211845056306 | 16.84506731343166 |
| C | 0.46096297241272  | 16.04511870512947 | 14.56907276255275 |
| H | 0.43314506808139  | 16.41531595265902 | 13.54452019438632 |
| H | -0.20327949579332 | 16.67065436562403 | 15.17173827280325 |
| H | 0.06980431210429  | 15.02698814783327 | 14.57459361213303 |
| C | 8.26134807626325  | 17.39638341931238 | 9.89303712592854  |
| H | 7.93698275080715  | 17.72374330622225 | 8.90347284481448  |
| H | 8.98492088103426  | 16.58817166618249 | 9.76352558965232  |
| H | 8.77824825092429  | 18.23233572097118 | 10.36949045984955 |
| C | 0.45586460137518  | 13.39206107844419 | 12.14440468906435 |
| H | 0.19458062728904  | 12.60723370764485 | 12.85872979107915 |
| H | -0.41762136072122 | 14.03458978579714 | 12.01165804011193 |
| H | 1.25725483743498  | 13.99191127554854 | 12.57392289576034 |
| C | 2.79864008980918  | 17.87103616397727 | 15.37478313427346 |
| H | 3.76394505943106  | 17.91952693986253 | 15.88379740784233 |
| H | 2.09448327455967  | 18.50928817330131 | 15.91428315042174 |
| H | 2.92870092023612  | 18.28016254726405 | 14.36992226051802 |
| C | 3.79234839408434  | 14.54579124189300 | 16.96579315763265 |

|   |                  |                   |                   |
|---|------------------|-------------------|-------------------|
| H | 3.84711256478390 | 13.72839644262370 | 17.68985668390285 |
| H | 4.48424462919794 | 15.31616722456424 | 17.32137278569132 |
| C | 6.18998779162574 | 14.34908569450861 | 14.99492165190326 |
| H | 6.50797800629257 | 14.10631484448731 | 13.98205802333986 |
| H | 6.76717685235766 | 13.72680885855092 | 15.68481581039321 |
| H | 6.43801651177197 | 15.39384220030871 | 15.19146905558719 |
| C | 1.41971563584978 | 18.10261341877550 | 11.46598300915888 |
| H | 1.85614861788746 | 17.24025790136309 | 11.97107605427239 |
| H | 0.39431351291094 | 17.85568874784512 | 11.17950465759694 |
| H | 1.38513893398777 | 18.92901293237660 | 12.18028775932225 |
| C | 7.53111963149005 | 16.43041555359662 | 12.11467774362304 |
| H | 8.00979412673120 | 17.23583648493453 | 12.67629936095973 |
| H | 8.24668852513329 | 15.61091314307744 | 12.02005726318041 |
| H | 6.68078113422069 | 16.07557429423508 | 12.69649690962524 |

Atomic coordinates of the optimized structure of a benzyl radical

|   |                   |                  |                   |
|---|-------------------|------------------|-------------------|
| C | -3.41612428391307 | 3.37495007360100 | 0.06106319679206  |
| H | -4.43193207018423 | 3.73205344558472 | -0.04056523660373 |
| H | -2.73226075359596 | 3.54366790305449 | -0.75961965252887 |
| C | -2.99784781087119 | 2.71331057962871 | 1.22267115238582  |
| C | -3.88927698152650 | 2.48693468205837 | 2.30727080209992  |
| C | -1.66405487290569 | 2.24101745222050 | 1.36524429239919  |
| C | -3.47089789913529 | 1.83436237688735 | 3.44904232406656  |
| C | -1.25798149755326 | 1.59023775775229 | 2.51241118649520  |
| C | -2.15432812923990 | 1.37988127664363 | 3.56372002139635  |
| H | -4.91108016087480 | 2.83720229860146 | 2.22356232794896  |
| H | -0.96514297365438 | 2.40110193024670 | 0.55306523545352  |
| H | -4.16810616801365 | 1.67344693653135 | 4.26213284173430  |
| H | -0.23670627959535 | 1.23997966613804 | 2.59840865079226  |
| H | -1.83088762093670 | 0.86822969505137 | 4.46087280556841  |

Atomic coordinates of the optimized structure of bibenzyl

|   |                    |                  |                   |
|---|--------------------|------------------|-------------------|
| C | -8.76575644577102  | 3.65543380711450 | -0.06842164978842 |
| C | -7.37255013226490  | 3.37804836918400 | 0.53512562405652  |
| H | -9.16506896911237  | 2.72172635360425 | -0.47161398603893 |
| H | -8.65315118899084  | 4.34358981818805 | -0.90954398395056 |
| C | -9.72021734686438  | 4.23063550222472 | 0.94291445586407  |
| C | -6.41847120689879  | 2.80214488222493 | -0.47617160333848 |
| H | -7.48517197573546  | 2.69019280106529 | 1.37649722799646  |
| H | -6.97303677419237  | 4.31184314829261 | 0.93789715219554  |
| C | -9.81152658096605  | 5.60958181767745 | 1.13614928786483  |
| C | -10.65990400147376 | 6.14154722121617 | 2.10055848622044  |
| C | -11.43361323709136 | 5.29874383034461 | 2.89133297139859  |
| C | -11.35253280053274 | 3.92233322577982 | 2.70820961039184  |
| C | -10.50240037180630 | 3.39604668385603 | 1.74228477955572  |
| C | -6.32713367169034  | 1.42305094160072 | -0.66833203990356 |

|   |                    |                   |                   |
|---|--------------------|-------------------|-------------------|
| C | -5.47929732326949  | 0.89041300911437  | -1.63283861386902 |
| C | -4.70616942781400  | 1.73266788005871  | -2.42478348154433 |
| C | -4.78723299231012  | 3.10921289597150  | -2.24270485668054 |
| C | -5.63681631035213  | 3.63616582167231  | -1.27667225965082 |
| H | -9.21425111956428  | 6.27275990494694  | 0.52060170502076  |
| H | -10.71995443755125 | 7.21496394193551  | 2.23201305092047  |
| H | -12.09730097031241 | 5.71130349846576  | 3.64070946068746  |
| H | -11.95496133394359 | 3.25793520291934  | 3.31544895299293  |
| H | -10.44706276711902 | 2.32237228617154  | 1.60189067104813  |
| H | -5.69221931436916  | 4.70993131270522  | -1.13701258261618 |
| H | -6.92394727163589  | 0.76030551765330  | -0.05186778904744 |
| H | -5.41913650406909  | -0.18308551312862 | -1.76357376722358 |
| H | -4.04296058786331  | 1.31950975557363  | -3.17425401108855 |
| H | -4.18524798143521  | 3.77318925356721  | -2.85084213747337 |

Atomic coordinates of the optimized structure of **Bn-TS** ( $S = 1$ )

|    |                   |                   |                   |
|----|-------------------|-------------------|-------------------|
| Fe | 0.16328924088922  | 0.26406873140511  | -0.21046913783882 |
| Si | -2.18568654253364 | -2.92428740582496 | 1.65020516394807  |
| Si | -0.97908801056955 | -1.02781201342260 | 3.59496905128230  |
| N  | -0.72196104864226 | -0.66784363296723 | 0.92625158461930  |
| N  | -1.26418757484887 | -1.43224967559270 | 1.89034295069604  |
| N  | 1.21699347977375  | -0.57043476826684 | -1.58999478999824 |
| N  | 0.92639347885177  | 2.04280561569562  | -0.51816960455345 |
| C  | -1.16474041714598 | -4.18410227427029 | 0.73255400892251  |
| H  | -0.25220825605461 | -4.41484946762298 | 1.28540263581591  |
| H  | -0.86885289771921 | -3.81600646568813 | -0.24892646708181 |
| H  | -1.72240752178519 | -5.11341425485292 | 0.58909366721312  |
| C  | -3.83230942432915 | -2.66759274842451 | 0.80097276486279  |
| H  | -4.47175370814513 | -1.99800676922134 | 1.37969774467207  |
| H  | -4.34489055175213 | -3.62995332628125 | 0.71255433162327  |
| H  | -3.72428817703637 | -2.25258056314322 | -0.19990985256794 |
| C  | 0.65682842629160  | -1.70569632701141 | 4.21009470133895  |
| H  | 0.63084676354351  | -2.79784121196456 | 4.21874870627712  |
| H  | 0.85680877923567  | -1.36495797985851 | 5.22965303560097  |
| H  | 1.49167826920800  | -1.39813632278485 | 3.58313082652053  |
| C  | -1.08863396381123 | 0.81960846409679  | 3.84376978488265  |
| H  | -0.39459397970021 | 1.34255762218169  | 3.18415426029703  |
| H  | -0.83854566992085 | 1.08609984788437  | 4.87354264429875  |
| H  | -2.09459886032988 | 1.18656057414940  | 3.63179474663851  |
| C  | -2.42873508428279 | -3.35582931475458 | 3.47657338814071  |
| H  | -3.35824010508266 | -3.90945087477721 | 3.63623644926607  |
| H  | -1.61767501923951 | -4.01986714402917 | 3.79004674400979  |
| C  | -2.38759258489377 | -2.04708583793962 | 4.31291141225846  |
| H  | -2.28300219527952 | -2.25097587968178 | 5.38171804485242  |
| H  | -3.32253463552019 | -1.49273730145099 | 4.18470358934383  |
| C  | -1.99744596578601 | 0.68522675970955  | 0.43053001280215  |

|   |                   |                   |                   |
|---|-------------------|-------------------|-------------------|
| H | -2.60847602005099 | 0.39738128860071  | 1.27361752517830  |
| H | -1.57787994780729 | 1.66483039250846  | 0.64039540818140  |
| C | -2.76524169114757 | 0.64697126506172  | -0.83911664270310 |
| C | -2.19971085819829 | 0.94171265003335  | -2.08670101069137 |
| C | -4.13761732064690 | 0.37495384980378  | -0.80227853015003 |
| C | -2.97146045778351 | 0.98413131487043  | -3.23699878739754 |
| C | -4.91408244349741 | 0.40657326208422  | -1.95368689900984 |
| C | -4.33581978214241 | 0.71652896533741  | -3.17904297623013 |
| H | -1.13754269010067 | 1.13522603531040  | -2.16564566894226 |
| H | -4.60230820796717 | 0.15200503064619  | 0.14905911302263  |
| H | -2.50201559681147 | 1.21711461002778  | -4.18479714105437 |
| H | -5.97464803964394 | 0.19593985823586  | -1.89077601369561 |
| H | -4.93811713265674 | 0.74387347318653  | -4.07820150521428 |
| C | 1.90295230204566  | 0.07918140158735  | -2.52699118781033 |
| C | 2.56846474372536  | -0.69155581946795 | -3.64304005816366 |
| H | 3.17500860029274  | -1.50792962716993 | -3.25094715403060 |
| H | 3.20185794131850  | -0.03266748132364 | -4.23241710195230 |
| H | 1.82665806983688  | -1.13903776045111 | -4.30458906316744 |
| C | 2.09758686874319  | 1.46329915791722  | -2.52372976919577 |
| H | 2.70705586528675  | 1.86088807620998  | -3.32115550577287 |
| C | 1.74165500457614  | 2.36355350130775  | -1.51316211369563 |
| C | 2.42015640684778  | 3.71180783968484  | -1.55486684096873 |
| H | 1.85626446092315  | 4.48534848754415  | -1.04305780489084 |
| H | 2.59549227037149  | 4.01512162946686  | -2.58621222954415 |
| H | 3.39377076523445  | 3.63879633049571  | -1.06319439590304 |
| C | 1.26582596849422  | -2.00177602790494 | -1.59617057343579 |
| C | 2.16914531768222  | -2.64414595258933 | -0.72516872236338 |
| C | 2.29751841753576  | -4.02855859615316 | -0.80763984352748 |
| H | 2.99305348781899  | -4.54071574809794 | -0.15761316468551 |
| C | 1.54282140812373  | -4.76940083653465 | -1.70585443412739 |
| H | 1.66207112007211  | -5.84445138284345 | -1.75879424180061 |
| C | 0.61243084276873  | -4.13079397398636 | -2.50761211687137 |
| H | -0.00805159032823 | -4.71663091826274 | -3.17346258124780 |
| C | 0.44792626680454  | -2.74678489732126 | -2.46158894635881 |
| C | 2.97989222593135  | -1.84551267033575 | 0.28227197554259  |
| H | 2.33593779231681  | -1.02955864212520 | 0.61732772422132  |
| C | 3.36350882780904  | -2.65768885275649 | 1.52047532318454  |
| H | 2.49551132379670  | -3.14851363762874 | 1.96210993873873  |
| H | 3.80082650956978  | -2.00063080335940 | 2.27354905415734  |
| H | 4.10675201080071  | -3.42399765546734 | 1.28963102001372  |
| C | 4.23174530979607  | -1.21276882554713 | -0.34042086733373 |
| H | 4.89304094589155  | -1.98424696091137 | -0.74277884001205 |
| H | 4.78614226738162  | -0.65259201587463 | 0.41657717692573  |
| H | 3.97824950664795  | -0.52364728244926 | -1.14332238925373 |
| C | -0.65231142526478 | -2.10052853638324 | -3.28219562485201 |
| H | -0.49671797172190 | -1.02304671619192 | -3.26354715001368 |

|   |                   |                   |                   |
|---|-------------------|-------------------|-------------------|
| C | -2.00727150395508 | -2.38060345548132 | -2.62013905667057 |
| H | -2.20337603832682 | -3.45458797651177 | -2.58329113696322 |
| H | -2.81608533257212 | -1.89848874060449 | -3.17039693579890 |
| H | -2.01706499588718 | -1.99508537929290 | -1.60343618359054 |
| C | -0.66814987149816 | -2.54761825262109 | -4.74697732841201 |
| H | 0.29934325617846  | -2.39769683196377 | -5.22913206428654 |
| H | -1.41622081061553 | -1.97654344648402 | -5.30115756417853 |
| H | -0.92589005427675 | -3.60434018229467 | -4.84219097391600 |
| C | 0.72816321454800  | 2.98006863885556  | 0.54953483074631  |
| C | 1.63559183323463  | 2.98453800781521  | 1.62608611227591  |
| C | 1.40034064075429  | 3.84078889872479  | 2.69900785351228  |
| H | 2.08308954283735  | 3.83915558103253  | 3.53931241621265  |
| C | 0.30795040139572  | 4.69386159188352  | 2.71021965723275  |
| H | 0.13846674157303  | 5.35159409581989  | 3.55369101137246  |
| C | -0.56034278295388 | 4.70679928022918  | 1.63036713909469  |
| H | -1.40177838776096 | 5.38708979608269  | 1.63431874774859  |
| C | -0.37152991067649 | 3.86266274001711  | 0.53633323004721  |
| C | 2.85258208818042  | 2.07795958867765  | 1.65283688915441  |
| H | 2.93384229723685  | 1.59586465324908  | 0.68024807064752  |
| C | 2.67418472195522  | 0.97147650648359  | 2.69407959042832  |
| H | 2.55022287262377  | 1.38776765631007  | 3.69618093045280  |
| H | 3.53997280675238  | 0.30697172063388  | 2.70605114255217  |
| H | 1.79097858746586  | 0.37974783889569  | 2.46133011694651  |
| C | 4.15122878805759  | 2.85569216891207  | 1.89229881686444  |
| H | 4.27332932584333  | 3.66032832989672  | 1.16518773132827  |
| H | 5.00980885483387  | 2.18577515712097  | 1.80806344510607  |
| H | 4.17524816185017  | 3.30016658811844  | 2.88931244674933  |
| C | -1.31904724352039 | 3.95064683796813  | -0.64767652994848 |
| H | -1.20680735479931 | 3.03319281177674  | -1.21710953496018 |
| C | -2.79149518277613 | 4.07177972302148  | -0.23894010970877 |
| H | -3.07097015183193 | 3.32206462904837  | 0.50057618130324  |
| H | -3.42799580025360 | 3.93295397763731  | -1.11446453066762 |
| H | -3.01184701470456 | 5.05670745183925  | 0.17805254471884  |
| C | -0.95190062641396 | 5.11203756596203  | -1.58331361864149 |
| H | -0.98719023358456 | 6.06462828876953  | -1.04898876360517 |
| H | -1.66107614398400 | 5.16284367819310  | -2.41284749462119 |
| H | 0.04550738901091  | 4.99652760820473  | -2.00344583976781 |

Atomic coordinates of the optimized structure of **Bn-TS** ( $S = 2$ )

|    |                   |                   |                   |
|----|-------------------|-------------------|-------------------|
| Fe | 0.16012218301986  | 0.21998856650244  | -0.10656713141275 |
| Si | -2.23151582667567 | -3.04429119729275 | 1.82897211171307  |
| Si | -1.14529626789399 | -0.89199799414519 | 3.58195312930610  |
| N  | -0.82712382830943 | -0.95260251607872 | 0.84167853763141  |
| N  | -1.36989371499450 | -1.49774138022893 | 1.93071709724830  |
| N  | 1.17065043821714  | -0.56836114266760 | -1.67547866132837 |
| N  | 0.93017199623609  | 2.08047284718096  | -0.34773692754422 |

|   |                   |                   |                   |
|---|-------------------|-------------------|-------------------|
| C | -1.16243233672844 | -4.32170327510464 | 0.98865944091664  |
| H | -0.19547867293058 | -4.40111055479028 | 1.48988094704796  |
| H | -0.97391747096922 | -4.05315302335725 | -0.05127711614286 |
| H | -1.63852915009861 | -5.30564640897918 | 1.00395364445925  |
| C | -3.88080359750167 | -2.88349377810024 | 0.95952989616432  |
| H | -4.52691724748439 | -2.16965367932432 | 1.47523322646626  |
| H | -4.39017290242185 | -3.85120545786175 | 0.94446670542070  |
| H | -3.75937478478158 | -2.55169944605624 | -0.07150364543865 |
| C | 0.55809749623877  | -1.35406444981902 | 4.20736010979149  |
| H | 1.33626418635493  | -0.97576044205645 | 3.54580942691322  |
| H | 0.65961546634084  | -2.44077737685528 | 4.25278729578237  |
| H | 0.74041401557122  | -0.95257548058983 | 5.20740413960214  |
| C | -1.41226660513931 | 0.95286789775934  | 3.67397193519065  |
| H | -0.72056143612328 | 1.48519794990539  | 3.01916659811387  |
| H | -1.23832014967579 | 1.30985775920031  | 4.69224697018173  |
| H | -2.42908926924355 | 1.22302633443321  | 3.38525891232271  |
| C | -2.44200086511525 | -3.33345958292977 | 3.68567254549019  |
| H | -3.33702041641410 | -3.91951788612163 | 3.91153676495548  |
| H | -1.59099199399820 | -3.92136299583433 | 4.04313752160628  |
| C | -2.46389772798831 | -1.95435565799729 | 4.40456852043348  |
| H | -2.32440170507153 | -2.05920932717192 | 5.48380362208895  |
| H | -3.43654816917682 | -1.47374479905151 | 4.25914119735384  |
| C | -2.10434587038371 | 0.60303819755411  | 0.27137911895299  |
| H | -2.75310090644756 | 0.23479492134833  | 1.05264066228722  |
| H | -1.67731406483112 | 1.55975535099150  | 0.56638772136474  |
| C | -2.74104629678272 | 0.60632592380369  | -1.05139543886443 |
| C | -2.09423237638135 | 1.08539017121992  | -2.20111766158387 |
| C | -4.05025918959459 | 0.12418076732128  | -1.20053556062894 |
| C | -2.72253532104023 | 1.07731515683993  | -3.43657271066164 |
| C | -4.68255541175260 | 0.11920074072908  | -2.43551214990635 |
| C | -4.02128797303055 | 0.59204387801542  | -3.56449096033479 |
| H | -1.08121735610691 | 1.45999275931704  | -2.12937183165575 |
| H | -4.57553789759835 | -0.24075451037738 | -0.32742641486918 |
| H | -2.19353875324564 | 1.44762747157495  | -4.30625697419865 |
| H | -5.69433311198989 | -0.25899763680505 | -2.51811664142240 |
| H | -4.50966026641156 | 0.58150509078096  | -4.53054443395351 |
| C | 1.77373561313747  | 0.18336938043704  | -2.58676414667324 |
| C | 2.44059411830081  | -0.47921088382591 | -3.76897274899928 |
| H | 3.24730316238722  | -1.13244023072839 | -3.43156871745920 |
| H | 2.85291650377383  | 0.26212732934908  | -4.44927724247031 |
| H | 1.73620246016608  | -1.10765863395698 | -4.31353966674474 |
| C | 1.89259798694353  | 1.57844435865326  | -2.50281180288960 |
| H | 2.41198626304432  | 2.04424196937026  | -3.32734266074816 |
| C | 1.59792715883752  | 2.44125998286542  | -1.43429427966686 |
| C | 2.13651386838823  | 3.84640218100410  | -1.58133469653415 |
| H | 2.15224321146546  | 4.38132384443215  | -0.63591356389180 |

|   |                   |                   |                   |
|---|-------------------|-------------------|-------------------|
| H | 1.51765652021429  | 4.40925943799676  | -2.28187131948761 |
| H | 3.14650912871627  | 3.81698475114929  | -1.98836945308350 |
| C | 1.32789770038721  | -1.98713538561120 | -1.72569626364719 |
| C | 2.37759069472254  | -2.57292745834351 | -0.99444202296478 |
| C | 2.51704964746824  | -3.95893517804907 | -1.01133471781325 |
| H | 3.32017813380923  | -4.41863388748413 | -0.44857565028055 |
| C | 1.64643757533819  | -4.75844388130054 | -1.73563791856919 |
| H | 1.76830970964193  | -5.83452821328678 | -1.73948026776844 |
| C | 0.61334550816809  | -4.16977848827984 | -2.44828267138031 |
| H | -0.07413697437803 | -4.79585494545890 | -3.00312871069975 |
| C | 0.43358613586707  | -2.78771380335090 | -2.45586009909353 |
| C | 3.34509261759445  | -1.73439457313625 | -0.17985772891692 |
| H | 3.08757693214983  | -0.68819694506316 | -0.33451760234194 |
| C | 3.19022833146402  | -2.02954360929967 | 1.31535420690926  |
| H | 2.16221759249447  | -1.85796281705320 | 1.63531900766392  |
| H | 3.84754070730531  | -1.38737204851981 | 1.90518044315547  |
| H | 3.44350146722318  | -3.06770131072554 | 1.54090981086149  |
| C | 4.79662817358711  | -1.91989995850002 | -0.63601669495459 |
| H | 5.13671411713224  | -2.94541612011718 | -0.47672132745138 |
| H | 5.45878387924414  | -1.25659048565549 | -0.07455084497866 |
| H | 4.90764933696460  | -1.69074744369579 | -1.69739276321467 |
| C | -0.74210960383069 | -2.18953178427538 | -3.20075491825630 |
| H | -0.63047448918517 | -1.10677041161776 | -3.18563974391198 |
| C | -2.04587667041153 | -2.52126975017968 | -2.46864341971942 |
| H | -2.21625073044086 | -3.60055464204515 | -2.44972794691315 |
| H | -2.89499363235529 | -2.04486961985500 | -2.95850986577992 |
| H | -2.00009853180286 | -2.16278109044092 | -1.44230383524094 |
| C | -0.81159089184655 | -2.63295668917329 | -4.66547093887976 |
| H | 0.11722046828570  | -2.41835591282779 | -5.19757090104356 |
| H | -1.62397915141553 | -2.11006659288869 | -5.17513178266689 |
| H | -1.00312287678775 | -3.70477169809040 | -4.75071995364756 |
| C | 0.73400318437135  | 2.97531964107705  | 0.74522686586826  |
| C | 1.50481939205778  | 2.77139456491209  | 1.91375592479316  |
| C | 1.27852109174312  | 3.59316054551027  | 3.01372237409733  |
| H | 1.85844913046359  | 3.45463364003556  | 3.91438444765099  |
| C | 0.30649107251284  | 4.58334059307663  | 2.98597460568793  |
| H | 0.13953341479288  | 5.20534917636067  | 3.85641653072412  |
| C | -0.44990522461808 | 4.76520478827209  | 1.84303289384304  |
| H | -1.20896874068410 | 5.53668019522366  | 1.82514423932953  |
| C | -0.25482745533256 | 3.97930989233795  | 0.70613163815920  |
| C | 2.55917469132660  | 1.67538288298759  | 1.97206928995737  |
| H | 2.11666081914171  | 0.77650445355173  | 1.52610693392555  |
| C | 2.97988433478128  | 1.31094856077954  | 3.39616905019118  |
| H | 3.57196740672606  | 2.10804097856443  | 3.85136517900214  |
| H | 3.59881697505528  | 0.41332405316239  | 3.37902071946362  |
| H | 2.12191219610629  | 1.11704251470179  | 4.03849687282784  |

|   |                   |                  |                   |
|---|-------------------|------------------|-------------------|
| C | 3.80709872865688  | 2.02029329374439 | 1.14688452431632  |
| H | 3.57699629764038  | 2.16438668031759 | 0.09463281665964  |
| H | 4.54024822322309  | 1.21428935468849 | 1.22156208212338  |
| H | 4.26791122274670  | 2.93517303856065 | 1.52682629904996  |
| C | -1.09891408198490 | 4.27227368713052 | -0.52462004081467 |
| H | -0.83930430435548 | 3.54604318931432 | -1.29295938451194 |
| C | -2.60434352457207 | 4.14650640041696 | -0.25034434343748 |
| H | -2.86564703692487 | 3.17396937942529 | 0.15996055409392  |
| H | -3.16478557146020 | 4.28021479830576 | -1.17762699164814 |
| H | -2.93689319556753 | 4.91143963227922 | 0.45438951594925  |
| C | -0.81147142056357 | 5.67858934364682 | -1.07548958252260 |
| H | -1.15910576436566 | 6.44221524623334 | -0.37642792945731 |
| H | -1.33795587285625 | 5.82849121897982 | -2.02071596341087 |
| H | 0.25071599252514  | 5.84473772910115 | -1.24523724057690 |

Atomic coordinates of the optimized structure of **13** ( $S = 1$ )

|    |                   |                   |                  |
|----|-------------------|-------------------|------------------|
| Fe | 6.03251610755002  | 13.48336973339988 | 4.52300520264043 |
| Si | 5.27347419494424  | 16.63532982825490 | 2.44872034688643 |
| Si | 2.69118744667861  | 15.66632238498371 | 3.46994205200100 |
| N  | 5.46017421025513  | 11.67805236029027 | 4.92704644429669 |
| N  | 7.92215231447083  | 13.05877623556342 | 4.61243336684440 |
| N  | 5.14121277725037  | 15.06900919805514 | 4.75416086680569 |
| N  | 4.43779322314766  | 15.66637937502799 | 3.64637831407248 |
| C  | 4.13257507579391  | 11.27753633673615 | 4.56338333477099 |
| C  | 8.38113166096997  | 12.06746917233005 | 5.37272230793247 |
| C  | 8.87778514514931  | 13.83202924124221 | 3.87281747914931 |
| C  | 6.23490938727836  | 10.78734912633951 | 5.54050554101984 |
| C  | 3.10073898879918  | 11.27310708734838 | 5.52044808305215 |
| C  | 1.57963632941139  | 10.43268095750161 | 3.83244536108715 |
| H  | 0.58735099630738  | 10.10412943133674 | 3.54958807070222 |
| C  | 1.83361525325657  | 10.84254496658805 | 5.13167193598534 |
| H  | 1.02965406115118  | 10.83830983114359 | 5.85597913143516 |
| C  | 9.45184518104732  | 14.99648542926152 | 4.40660623589683 |
| C  | 3.88160434526597  | 10.87763174441915 | 3.23841518773154 |
| C  | 7.57202008126774  | 11.03747735385818 | 5.86359579901438 |
| H  | 8.07412265848321  | 10.27308856759451 | 6.43663834548230 |
| C  | 9.23491950056703  | 13.38367477932096 | 2.58264847435964 |
| C  | 10.41142129423464 | 15.67398818567868 | 3.65253519778720 |
| H  | 10.86385636015092 | 16.57052818126863 | 4.05696143290986 |
| C  | 4.97230263171250  | 10.93978318385516 | 2.18770424233916 |
| H  | 5.92678934558286  | 10.93752477081340 | 2.71177744791709 |
| C  | 3.31605623368923  | 11.78176582611997 | 6.93316430483758 |
| H  | 4.38780132625815  | 11.82123559754060 | 7.11520947591623 |
| C  | 8.58341297722145  | 12.15579203407178 | 1.97126510154244 |
| H  | 7.59136961680749  | 12.07638851075741 | 2.41413783588470 |
| C  | 2.59890413900680  | 10.45963768166795 | 2.89399600601886 |



|   |                   |                   |                   |
|---|-------------------|-------------------|-------------------|
| H | 2.39307122380296  | 10.15350847916941 | 1.87685410597827  |
| C | 9.84659151024117  | 12.00000798786231 | 5.72978065484330  |
| H | 10.48749961192529 | 12.23046898113247 | 4.88121674987651  |
| H | 10.10438654155021 | 11.01525758377661 | 6.11334800141932  |
| H | 10.06465127099047 | 12.73568679412723 | 6.50635686120684  |
| C | 10.20068131717442 | 14.08891748227935 | 1.87205726428975  |
| H | 10.48886887993715 | 13.75428473416608 | 0.88500345447301  |
| C | 5.69507200278105  | 9.41822367795439  | 5.87528405936601  |
| H | 4.87314570225841  | 9.46997166882911  | 6.58921627392902  |
| H | 6.47991462053590  | 8.79348809887544  | 6.29506794318933  |
| H | 5.30350796759227  | 8.93384631977884  | 4.97878861909956  |
| C | 10.79689595801327 | 15.22383313504549 | 2.40269955067851  |
| H | 11.54838901294572 | 15.75992275554159 | 1.83635845189321  |
| C | 4.86799952723499  | 12.25476023154337 | 1.40369942133182  |
| H | 3.90644623271116  | 12.31729442194352 | 0.88965560447987  |
| H | 5.65819211264530  | 12.32635060039379 | 0.65685052830378  |
| H | 4.94136081041451  | 13.12314613171769 | 2.06251334859588  |
| C | 8.41125100909934  | 12.26201762371081 | 0.45402818717595  |
| H | 7.91932875124539  | 13.19278704450554 | 0.16916450714847  |
| H | 7.80669336294611  | 11.42895367713685 | 0.09104489524603  |
| H | 9.37047359220714  | 12.21412326012628 | -0.06505132926813 |
| C | 9.05067961125798  | 15.56809878457750 | 5.75194826715818  |
| H | 8.30854002070814  | 14.90627404544016 | 6.19160784457483  |
| C | 4.97766590824980  | 9.73880586483610  | 1.23943469956290  |
| H | 5.01684030262598  | 8.79895360156509  | 1.79324535312295  |
| H | 5.85135259346333  | 9.78529185609978  | 0.58614510501038  |
| H | 4.09311151790083  | 9.71737097774294  | 0.59987478535891  |
| C | 1.98070257484050  | 13.97146287190719 | 3.14671268747477  |
| H | 2.35879372009111  | 13.55668286875644 | 2.21268534518760  |
| H | 0.89114286570891  | 14.03243703802770 | 3.07477834752033  |
| H | 2.22023511449998  | 13.26704165936868 | 3.94124533319177  |
| C | 1.73945997302454  | 16.42920937978226 | 4.90238191616096  |
| H | 1.70186828191454  | 15.78389614684954 | 5.78150341554128  |
| H | 0.70734904814237  | 16.60116547101750 | 4.58010655029721  |
| H | 2.16155457714555  | 17.39179027079448 | 5.19798175075151  |
| C | 2.77794823536154  | 13.21298760427819 | 7.04932843750706  |
| H | 3.22558931410149  | 13.84763238757101 | 6.28773680882712  |
| H | 3.00815544150115  | 13.63689562537035 | 8.02861322533181  |
| H | 1.69464089104918  | 13.22852451026853 | 6.90938337267670  |
| C | 8.39946243968982  | 16.94258674749247 | 5.55888292899326  |
| H | 9.08246680825670  | 17.63413129943937 | 5.06137856449340  |
| H | 8.11932634922077  | 17.37314989404607 | 6.51954109106370  |
| H | 7.50252389917727  | 16.85589930231175 | 4.94935278656785  |
| C | 2.70556830823211  | 10.88064543509771 | 8.01006508906029  |
| H | 1.61516619834285  | 10.87257269562584 | 7.96133663364430  |
| H | 2.98685598569373  | 11.24508718541173 | 9.00024839112766  |

|   |                   |                   |                   |
|---|-------------------|-------------------|-------------------|
| H | 3.05259849453526  | 9.84991324587989  | 7.91631247833373  |
| C | 3.89869955502998  | 16.69966741707577 | 1.16531650596824  |
| H | 4.00798715317631  | 17.52001488218763 | 0.45071944417490  |
| H | 3.93421275432736  | 15.77022450126269 | 0.58787261062921  |
| C | 2.56628063272627  | 16.78297895271832 | 1.95067081825561  |
| H | 1.70349487401348  | 16.52608096940712 | 1.32894011555656  |
| H | 2.40398533822438  | 17.80978713074635 | 2.29367679040179  |
| C | 9.34047633818419  | 10.86509554829236 | 2.31633963936773  |
| H | 10.36303301033184 | 10.90799496014023 | 1.93315553508735  |
| H | 8.84334669985486  | 10.00420096898371 | 1.86291164516023  |
| H | 9.38524075935144  | 10.69517845288667 | 3.38991285719701  |
| C | 5.66677557260114  | 18.37236791238663 | 3.05477471575042  |
| H | 4.75272727511856  | 18.88149327467002 | 3.37005710725869  |
| H | 6.12324286265058  | 18.96365280013616 | 2.25552235884947  |
| H | 6.35797465620605  | 18.36951772917809 | 3.89869924665907  |
| C | 10.22917671453385 | 15.67284500509780 | 6.72724635332435  |
| H | 10.73329660652714 | 14.71485622377144 | 6.85787332138996  |
| H | 9.87263770307507  | 16.00371693789539 | 7.70463374531889  |
| H | 10.97153153897407 | 16.39411312024887 | 6.37774976322776  |
| C | 6.83144825921203  | 15.83853051870997 | 1.80269278232445  |
| H | 7.64093791841715  | 15.84536513690378 | 2.53035334568973  |
| H | 7.17517413444662  | 16.38802492662695 | 0.92140609084972  |
| H | 6.65511787068727  | 14.80492893158846 | 1.50331428269051  |
| C | 4.96213530802375  | 15.88955512167229 | 5.94875021587975  |
| H | 3.90127298333305  | 15.91810092284393 | 6.22524229770009  |
| H | 5.22706837036267  | 16.92631999305126 | 5.71249311987612  |
| C | 5.75207493124294  | 15.45817620630720 | 7.15907945817461  |
| C | 6.16969819795685  | 16.42932449113647 | 8.07086306076244  |
| C | 6.07502390226712  | 14.13042637170697 | 7.42878944232552  |
| C | 6.90685281606195  | 16.09027144290722 | 9.19772564247933  |
| C | 6.82549205263688  | 13.78342174952609 | 8.54638963449124  |
| C | 7.24921629896337  | 14.76258265401333 | 9.43554607371043  |
| H | 5.93052996007631  | 17.46928946831143 | 7.88163564857824  |
| H | 5.73834179562918  | 13.34449085568148 | 6.76895620323070  |
| H | 7.22761063378492  | 16.86516781614489 | 9.88305215758520  |
| H | 7.07769177251493  | 12.74376839328285 | 8.71259789383972  |
| H | 7.83840457077174  | 14.49683425393852 | 10.30420062011296 |

Atomic coordinates of the optimized structure of **13** ( $S = 2$ )

|    |                  |                   |                  |
|----|------------------|-------------------|------------------|
| Fe | 6.13797378668061 | 13.63223540977502 | 4.60276896848753 |
| Si | 5.35790443454206 | 16.71849174218984 | 2.43109271669008 |
| Si | 2.73673357485353 | 15.77195614346426 | 3.39577320595922 |
| N  | 5.51660083378483 | 11.74411158206683 | 5.02806794287325 |
| N  | 8.09659144484451 | 13.08202792710625 | 4.48870058458965 |
| N  | 5.09011324530890 | 15.21300815497719 | 4.77869122927734 |
| N  | 4.47303068176241 | 15.78529802611397 | 3.61206408484545 |

|   |                   |                   |                   |
|---|-------------------|-------------------|-------------------|
| C | 4.18079768563690  | 11.33440165102236 | 4.72958841519780  |
| C | 8.53249675715358  | 12.07070187845148 | 5.24400658209813  |
| C | 9.05186124412882  | 13.80558959486365 | 3.70593207207443  |
| C | 6.33407032285072  | 10.86317923964913 | 5.58354453461096  |
| C | 3.16588172931329  | 11.46179942219435 | 5.69156231917953  |
| C | 1.60688326601446  | 10.45742531481639 | 4.13114805259615  |
| H | 0.60739290949024  | 10.10927338619652 | 3.90225185543435  |
| C | 1.88730740768836  | 11.00485657999969 | 5.37202177878602  |
| H | 1.09661054070663  | 11.08919448912429 | 6.10685146783595  |
| C | 9.73779165244064  | 14.91312507643615 | 4.23121302550007  |
| C | 3.90084693478633  | 10.81393970407734 | 3.45217178524468  |
| C | 7.70342237129942  | 11.09695431217372 | 5.80885517740165  |
| H | 8.21355429531793  | 10.32998241981820 | 6.37109353610909  |
| C | 9.26995463732801  | 13.39318304950495 | 2.37395315023482  |
| C | 10.63118944405735 | 15.60073074773096 | 3.41021695251331  |
| H | 11.15505089689358 | 16.46277585714655 | 3.80240456004294  |
| C | 4.96580327787843  | 10.80498903993312 | 2.37257275906215  |
| H | 5.93707104109619  | 10.81136273891885 | 2.86641384542443  |
| C | 3.40761387096557  | 12.11651223861902 | 7.03896453536249  |
| H | 4.45090147144671  | 12.42328479669176 | 7.08211914024925  |
| C | 8.52048742647328  | 12.20647647391575 | 1.79273348866520  |
| H | 7.54623850076740  | 12.18700208439982 | 2.28140470358714  |
| C | 2.60873768232489  | 10.37882408795403 | 3.17456862723046  |
| H | 2.37841502735965  | 9.97860733645524  | 2.19608160510049  |
| C | 10.01413929605325 | 11.92072607345543 | 5.50487161447893  |
| H | 10.59366662754621 | 12.01314823301396 | 4.58770300505882  |
| H | 10.23075232086897 | 10.96000768716636 | 5.96576418101343  |
| H | 10.35775658197498 | 12.70995305299120 | 6.17660591983016  |
| C | 10.18486528219084 | 14.09914550211217 | 1.59853860278948  |
| H | 10.36447022749080 | 13.79706016895506 | 0.57620685405933  |
| C | 5.82901777429488  | 9.48683799077684  | 5.94604725694323  |
| H | 4.87642691707123  | 9.52366670571749  | 6.46925169487575  |
| H | 6.55604492750671  | 8.95901995495465  | 6.55898934893954  |
| H | 5.66529237280432  | 8.90694874010918  | 5.03367594860099  |
| C | 10.86160401778449 | 15.19889237944355 | 2.10581628849831  |
| H | 11.56242617123240 | 15.74120151110356 | 1.48335219113587  |
| C | 4.85233499897504  | 12.09062879206244 | 1.54140254917312  |
| H | 3.87373484618016  | 12.14694572195364 | 1.06106743478041  |
| H | 5.61582592286387  | 12.12611692638322 | 0.76552567417702  |
| H | 4.95589442861288  | 12.98355401189081 | 2.16307758885927  |
| C | 8.28800406920639  | 12.31616275967358 | 0.28453258244778  |
| H | 7.82296375003422  | 13.26520522570899 | 0.01487156485996  |
| H | 7.63467207700104  | 11.50751057248491 | -0.04722330962012 |
| H | 9.22097187197941  | 12.22421369698769 | -0.27503453312524 |
| C | 9.50330244588562  | 15.40394513108872 | 5.64583304107482  |
| H | 8.97486981704740  | 14.62002974438129 | 6.18359587026109  |

|   |                   |                   |                  |
|---|-------------------|-------------------|------------------|
| C | 4.92720581894943  | 9.56978240756430  | 1.47133283662948 |
| H | 4.97088300941390  | 8.65087310015550  | 2.05891624250996 |
| H | 5.78169560523884  | 9.57994460006299  | 0.79138965280726 |
| H | 4.02386853180490  | 9.53677673665727  | 0.85916486858846 |
| C | 2.05194097635910  | 14.06500269811751 | 3.05823813005045 |
| H | 2.41858331520425  | 13.67668141536098 | 2.10762779294418 |
| H | 0.95984288510156  | 14.09554560580767 | 3.01238876034596 |
| H | 2.33039269375936  | 13.35520542162451 | 3.83722346104261 |
| C | 1.76342165213407  | 16.51542364967800 | 4.82370854086623 |
| H | 1.82325426470694  | 15.91670148374798 | 5.73326590431131 |
| H | 0.70797722452154  | 16.57598909939864 | 4.54029732495532 |
| H | 2.10694848838829  | 17.52627884726532 | 5.05314509601409 |
| C | 2.55034342280580  | 13.38077259267411 | 7.16412526172865 |
| H | 2.80139751870529  | 14.08505741514533 | 6.37304909474099 |
| H | 2.72665198492334  | 13.86957360498578 | 8.12180970141506 |
| H | 1.48676451879672  | 13.14464325532863 | 7.08905525074404 |
| C | 8.60398651446577  | 16.64455800535700 | 5.62916974045824 |
| H | 9.11078378283056  | 17.47927914845552 | 5.13976289450189 |
| H | 8.33921688107804  | 16.94804037782241 | 6.64382080536425 |
| H | 7.68427395039303  | 16.44514339157887 | 5.08148756586693 |
| C | 3.14895258361431  | 11.16929498194562 | 8.21617974775067 |
| H | 2.10437560503773  | 10.85091086518725 | 8.24714545329300 |
| H | 3.37387864946954  | 11.67460217579532 | 9.15785481389604 |
| H | 3.76936494321467  | 10.27376222499504 | 8.15925008087843 |
| C | 3.99312747704553  | 16.86571873114132 | 1.13822013845993 |
| H | 4.12043939786550  | 17.72241562507089 | 0.47065366546242 |
| H | 4.03788576094507  | 15.97126727311745 | 0.50803946301305 |
| C | 2.63683580325214  | 16.91132393670601 | 1.88947953927665 |
| H | 1.79724298486407  | 16.66460829272689 | 1.23316205694441 |
| H | 2.45396413491050  | 17.92737776354207 | 2.25413462308350 |
| C | 9.21280818635372  | 10.87248356644788 | 2.10970937876374 |
| H | 10.22441097482773 | 10.85961739831342 | 1.69664922133948 |
| H | 8.65439503853784  | 10.04468200986625 | 1.66620374831722 |
| H | 9.27872359983105  | 10.69133400940453 | 3.18009739893096 |
| C | 5.89882561564334  | 18.40127025387054 | 3.07199956787045 |
| H | 5.04496106085586  | 18.96498524811377 | 3.45523907504204 |
| H | 6.36354093529936  | 18.98934695100538 | 2.27531076832810 |
| H | 6.62676572576752  | 18.30332026889077 | 3.87995173074959 |
| C | 10.80040464924228 | 15.68019461177177 | 6.41268064802203 |
| H | 11.46035935901174 | 14.81069496910774 | 6.40835957684234 |
| H | 10.57212229005889 | 15.93085872692761 | 7.45076494386432 |
| H | 11.35018605234596 | 16.52039757671845 | 5.98491707133969 |
| C | 6.86107285195717  | 15.82487740325193 | 1.77501690339683 |
| H | 7.64938778239032  | 15.72571016494301 | 2.52018237063463 |
| H | 7.28255554043393  | 16.37939218455999 | 0.93162138288194 |
| H | 6.60305862170885  | 14.82615249576136 | 1.41912168295833 |

|   |                  |                   |                   |
|---|------------------|-------------------|-------------------|
| C | 5.06589276068847 | 16.13953719752389 | 5.90334434323218  |
| H | 4.07172743331454 | 16.58318325143925 | 5.99186875150746  |
| H | 5.75099547060391 | 16.98833589442782 | 5.74554556754041  |
| C | 5.39500535372388 | 15.48478062125028 | 7.22109371315525  |
| C | 4.67516113315645 | 15.82182777206543 | 8.36725241347357  |
| C | 6.40021331854110 | 14.52804854947517 | 7.34663909379129  |
| C | 4.93525559163574 | 15.20794478259746 | 9.58643056689645  |
| C | 6.65586765947653 | 13.89190133743996 | 8.55502548450982  |
| C | 5.91880589650432 | 14.22875750601307 | 9.68364931402714  |
| H | 3.88386444971729 | 16.55867186545225 | 8.29629438944769  |
| H | 7.03821283228022 | 14.29151527798852 | 6.50400346906157  |
| H | 4.35516329433141 | 15.48116283643888 | 10.45926564904566 |
| H | 7.43085732271727 | 13.13790283408910 | 8.60700444068808  |
| H | 6.11009785743896 | 13.73745723261699 | 10.62918658701916 |

Atomic coordinates of the optimized structure of **7c** ( $S = 1$ )

|    |                   |                   |                   |
|----|-------------------|-------------------|-------------------|
| Fe | 6.66519842035352  | 7.14784358013293  | 14.96704622318167 |
| Si | 4.47323581419303  | 4.77147599710602  | 17.25222255948820 |
| Si | 5.99794882476972  | 6.47663183389594  | 19.20736589993214 |
| N  | 6.36885703834250  | 6.68249158176674  | 16.56374394884082 |
| N  | 5.68064231258405  | 6.06447679234282  | 17.49744387130745 |
| N  | 7.69302645484563  | 6.39081928843715  | 13.42710726105848 |
| N  | 7.27841914846577  | 9.00652987363303  | 14.60840041779058 |
| C  | 8.15014190992583  | 10.86604286502063 | 13.26582461778148 |
| H  | 8.96156928650235  | 11.20251437325541 | 13.91376456860369 |
| H  | 7.27899278639195  | 11.47398019497098 | 13.50948549645825 |
| H  | 8.43838458998443  | 11.05298852899826 | 12.23350748957441 |
| C  | 7.86384862641173  | 9.39856895736852  | 13.48102727681225 |
| C  | 8.30020814795762  | 8.51625849080530  | 12.48762230264711 |
| H  | 8.79254484356453  | 8.97079249343991  | 11.64005841505076 |
| C  | 8.33944704196290  | 7.11139212771635  | 12.52590239536663 |
| C  | 9.24620747117116  | 6.45567151980875  | 11.50890615321316 |
| H  | 9.03977867806461  | 5.39794882975030  | 11.37954645801590 |
| H  | 10.28287063145876 | 6.55414549621484  | 11.84125469697698 |
| H  | 9.16385790436995  | 6.95887983632191  | 10.54584617032917 |
| C  | 7.20073860485584  | 9.92012572322712  | 15.70263360315593 |
| C  | 8.34441553321393  | 10.10197531670036 | 16.50732527990969 |
| C  | 8.27256042893014  | 10.97938577915824 | 17.58602782952620 |
| H  | 9.14364725232983  | 11.12094698790690 | 18.21336992856450 |
| C  | 7.10400786375104  | 11.66853443954959 | 17.87568447476179 |
| H  | 7.06638462229220  | 12.34998810576730 | 18.71651569417253 |
| C  | 5.98099585908022  | 11.46467691531877 | 17.09066957712268 |
| H  | 5.06484050456399  | 11.99211317479583 | 17.32560977561524 |
| C  | 6.00382713103844  | 10.58935046450010 | 16.00551373721598 |
| C  | 9.62749178944313  | 9.32670888916164  | 16.26025744166839 |
| H  | 9.53382522097069  | 8.81567841260871  | 15.30398041335713 |

|   |                   |                   |                   |
|---|-------------------|-------------------|-------------------|
| C | 9.80796200104868  | 8.24718696972198  | 17.33476236007508 |
| H | 9.90508363204091  | 8.69683413002322  | 18.32584093380770 |
| H | 10.70609659685781 | 7.65663915220719  | 17.14000963054781 |
| H | 8.95114266503132  | 7.57474449672463  | 17.34780365713943 |
| C | 10.86213495542748 | 10.23048469697054 | 16.17878107506654 |
| H | 10.74319373747608 | 11.00085240936427 | 15.41467887588558 |
| H | 11.74489475134998 | 9.63804912249912  | 15.92802455243127 |
| H | 11.05897847897117 | 10.73036547044365 | 17.12945649295569 |
| C | 4.74187237860876  | 10.37579248578391 | 15.19416647814140 |
| H | 4.96878981735148  | 9.63782262953620  | 14.42846105298761 |
| C | 3.61836519615974  | 9.81076771849928  | 16.07330185533317 |
| H | 3.30722526670492  | 10.53652224028620 | 16.82811743883936 |
| H | 3.94499639472668  | 8.90721534688396  | 16.58881465790376 |
| H | 2.74443286555318  | 9.56279254433510  | 15.46688073459335 |
| C | 4.28845845902753  | 11.65940888458679 | 14.48821242510347 |
| H | 3.40085083727047  | 11.46677735823450 | 13.88091959328995 |
| H | 5.06959658255448  | 12.04808075748405 | 13.83272264062546 |
| H | 4.03854087759218  | 12.44031621043322 | 15.20993933702534 |
| C | 7.76361379712685  | 4.96596965648801  | 13.41233316413581 |
| C | 8.65565098627277  | 4.31248261268449  | 14.28281575416864 |
| C | 8.70697111116375  | 2.92055027173432  | 14.26913053520870 |
| H | 9.39794131428766  | 2.40959425460047  | 14.92769043833682 |
| C | 7.89328151384572  | 2.17885718016415  | 13.42727764384076 |
| H | 7.94890187005335  | 1.09735183058300  | 13.42713393895731 |
| C | 7.00067626090260  | 2.83227637149809  | 12.59243490336742 |
| H | 6.35728072122884  | 2.25066390182063  | 11.94459049916291 |
| C | 6.90993725911251  | 4.22291986788231  | 12.57139694223594 |
| C | 9.56516796255754  | 5.08095147213177  | 15.22240198772172 |
| H | 9.28788255970331  | 6.13276635611849  | 15.16606970448838 |
| C | 9.37255399021665  | 4.63200753245906  | 16.67400040381720 |
| H | 8.33216546575074  | 4.74823356317567  | 16.97567688250823 |
| H | 9.98845013105171  | 5.23292045852243  | 17.34426341930181 |
| H | 9.65557980011033  | 3.58613246065883  | 16.80948230236017 |
| C | 11.03395040734214 | 4.97098681936359  | 14.79536118171510 |
| H | 11.37936693926231 | 3.93557331545007  | 14.84142962326395 |
| H | 11.66820364499624 | 5.56883863570327  | 15.45411709055756 |
| H | 11.17471272784952 | 5.32524296538319  | 13.77288673030417 |
| C | 5.90545478968019  | 4.88410608061216  | 11.64271723133637 |
| H | 5.86515426861960  | 5.94021469611062  | 11.90174402013625 |
| C | 4.49657744682795  | 4.30019596960946  | 11.81650962370229 |
| H | 4.44075577891991  | 3.27918019572067  | 11.43334416542438 |
| H | 3.77019962418098  | 4.90080797220512  | 11.26517452937296 |
| H | 4.19628860300870  | 4.27978451124889  | 12.86354255139699 |
| C | 6.32707675641158  | 4.77644532208576  | 10.16997700387823 |
| H | 7.29346046222165  | 5.24382184041913  | 9.98731590999651  |
| H | 5.58904350228694  | 5.26511245723482  | 9.52944053661034  |

|   |                  |                  |                   |
|---|------------------|------------------|-------------------|
| H | 6.39700771734047 | 3.72978242600392 | 9.86414986924331  |
| C | 4.38207081608642 | 4.22411547451989 | 19.05403904627986 |
| H | 3.44329818716858 | 3.71234931168395 | 19.28199718763269 |
| H | 5.18440928401801 | 3.50469609828635 | 19.24463977992264 |
| C | 4.57952365955012 | 5.48097364574032 | 19.94497188303873 |
| H | 4.75894287982824 | 5.21121296478764 | 20.98901109841053 |
| H | 3.67367451253554 | 6.09468766823857 | 19.93199869627671 |
| C | 5.16941003800294 | 3.50857365334181 | 16.07160412298443 |
| H | 4.44566589842948 | 2.71348420621884 | 15.87675258285178 |
| H | 6.07650101244682 | 3.05649986819849 | 16.47654809438680 |
| H | 5.42900146549850 | 3.96753197294432 | 15.11691945067318 |
| C | 2.81250435828419 | 5.41645610165259 | 16.68289993187492 |
| H | 2.48249860020486 | 6.24786859754595 | 17.30956453569254 |
| H | 2.06735685058906 | 4.61917361774391 | 16.76064137281111 |
| H | 2.83875850957185 | 5.75842995482906 | 15.64968097048297 |
| C | 7.66132294274203 | 5.84040847947017 | 19.77496795012799 |
| H | 7.73722796207584 | 4.75926257925179 | 19.64441177910544 |
| H | 7.80274863372344 | 6.06610558137368 | 20.83555903767914 |
| H | 8.47526776396982 | 6.30764074715666 | 19.22026021515137 |
| C | 5.88721016313909 | 8.32529572095052 | 19.40276386845067 |
| H | 6.62708962611073 | 8.82008766485957 | 18.77059612652140 |
| H | 6.07044460958051 | 8.62723037899529 | 20.43692113878836 |
| H | 4.90186407631777 | 8.69015551006753 | 19.10695599635179 |
| C | 4.82407702653438 | 6.99657578058860 | 14.24527265765266 |
| H | 4.57019224446117 | 5.95660057990857 | 14.05590648512995 |
| H | 4.07404771865656 | 7.45342138893374 | 14.88213657768242 |
| H | 4.89232451259205 | 7.53516196133438 | 13.29702305822238 |

Atomic coordinates of the optimized structure of **7c** ( $S = 2$ )

|    |                  |                   |                   |
|----|------------------|-------------------|-------------------|
| Fe | 6.34116839155840 | 7.21613008153240  | 14.82426453038604 |
| Si | 5.04992858328421 | 4.24510676879019  | 17.38541433675381 |
| Si | 5.37310811260638 | 6.77321031705440  | 18.97912458077023 |
| N  | 6.26497414113869 | 6.47796510560010  | 16.40941799917472 |
| N  | 5.72729290068629 | 5.90719543927021  | 17.44588681132441 |
| N  | 7.53979069054381 | 6.36989747052122  | 13.41009128242505 |
| N  | 7.36270020183934 | 8.99713782154239  | 14.75332739360805 |
| C  | 8.60440409274951 | 10.75159714747772 | 13.54249613675162 |
| H  | 8.35062205526999 | 11.39062281844370 | 14.38239584661772 |
| H  | 8.26182201231832 | 11.22237747434705 | 12.61976517242087 |
| H  | 9.69159222102538 | 10.67526980233373 | 13.48323578061167 |
| C  | 8.00306280346914 | 9.36935762045441  | 13.66190170446155 |
| C  | 8.23292744210842 | 8.52198804832302  | 12.56185943223485 |
| H  | 8.71766285403608 | 8.99347327651315  | 11.71944539944338 |
| C  | 8.11467467219205 | 7.12859242015383  | 12.48109824025027 |
| C  | 8.72634095541161 | 6.48078400070075  | 11.26064442701147 |
| H  | 9.34979812879109 | 5.63078560682489  | 11.53559284654617 |

|   |                   |                   |                   |
|---|-------------------|-------------------|-------------------|
| H | 9.32682707487737  | 7.19540833831342  | 10.70294463911792 |
| H | 7.94438574665846  | 6.10038113615738  | 10.60370599427289 |
| C | 7.33196465837200  | 9.81893915871552  | 15.91494376766538 |
| C | 8.37889755674265  | 9.71342496797170  | 16.84902593566016 |
| C | 8.29955038965259  | 10.45333770163230 | 18.02634361698587 |
| H | 9.09821427855397  | 10.38038084231266 | 18.75432810409432 |
| C | 7.22064282910339  | 11.28752948215121 | 18.27874951219257 |
| H | 7.17477760924989  | 11.85572274013987 | 19.19951117960203 |
| C | 6.20696408825660  | 11.39959658271227 | 17.33920717174106 |
| H | 5.37412695986255  | 12.06313648329108 | 17.53346282087770 |
| C | 6.23750412188980  | 10.67206536439511 | 16.15041992277377 |
| C | 9.59965630697797  | 8.85068609865023  | 16.58297196703276 |
| H | 9.45231555995614  | 8.35100639338458  | 15.62735387491048 |
| C | 9.77777386403002  | 7.76101504954188  | 17.64261022118961 |
| H | 9.88158437763028  | 8.18891961151473  | 18.64162780426353 |
| H | 10.67839752462731 | 7.18088020335044  | 17.43543409563942 |
| H | 8.92630589507747  | 7.08107447123913  | 17.64874402263997 |
| C | 10.86722258191121 | 9.70794279826112  | 16.46759227896933 |
| H | 10.75664343325352 | 10.47980976233594 | 15.70459777165020 |
| H | 11.72356169559416 | 9.08406802129825  | 16.20141797061213 |
| H | 11.09481523945679 | 10.20372563830045 | 17.41404675658016 |
| C | 5.13675678063335  | 10.85702413740897 | 15.12076034332695 |
| H | 5.23339087478260  | 10.05545475575904 | 14.39102816098242 |
| C | 3.73195132152506  | 10.76371386170267 | 15.72409504721354 |
| H | 3.52996743247636  | 11.59367547552212 | 16.40466353547586 |
| H | 3.59789721679139  | 9.83532042081362  | 16.27630458398068 |
| H | 2.98328515437455  | 10.79749714743894 | 14.93008385949080 |
| C | 5.30203411537948  | 12.18986845974268 | 14.37548081223116 |
| H | 4.52912476129372  | 12.29627609426032 | 13.61058084122963 |
| H | 6.27331421406339  | 12.26052199281601 | 13.88709752189091 |
| H | 5.21259854352935  | 13.03175950518071 | 15.06648741867025 |
| C | 7.67619275953822  | 4.95177049530928  | 13.33447162924523 |
| C | 8.70561068815451  | 4.33614173509793  | 14.07859863582234 |
| C | 8.88393655848561  | 2.96114721927924  | 13.95701672111668 |
| H | 9.67594904562886  | 2.47441295980150  | 14.50878328814539 |
| C | 8.05123782864884  | 2.19430761657356  | 13.15419595797918 |
| H | 8.20687141507826  | 1.12566285602647  | 13.07273970227204 |
| C | 7.00452120819749  | 2.80054724700488  | 12.48161079900066 |
| H | 6.33508454304008  | 2.19548684374554  | 11.88304233308263 |
| C | 6.79326359948453  | 4.17762366060684  | 12.56026972627657 |
| C | 9.59540382489726  | 5.15288916563035  | 15.00069896758314 |
| H | 8.98322233336028  | 5.97316742206574  | 15.37765709514897 |
| C | 10.09013485948835 | 4.35495704143378  | 16.20984344672144 |
| H | 9.26317536715286  | 3.88379859863041  | 16.74187982807943 |
| H | 10.60620830863936 | 5.01760881828464  | 16.90432248527476 |
| H | 10.79743488748418 | 3.57468538754891  | 15.92130856053452 |



|   |                   |                  |                   |
|---|-------------------|------------------|-------------------|
| C | 10.78904517466034 | 5.77024075841661 | 14.25892847145636 |
| H | 11.40428411797711 | 4.98962219047106 | 13.80420964262724 |
| H | 11.41596474431951 | 6.33192470264671 | 14.95542148902360 |
| H | 10.47082113883122 | 6.45465628928248 | 13.47440826289300 |
| C | 5.59496997770504  | 4.77796548334883 | 11.84732232088382 |
| H | 5.61816659571618  | 5.85583328168709 | 12.00333556311786 |
| C | 4.29428913920610  | 4.24011897220721 | 12.45950069525733 |
| H | 4.18309089355868  | 3.17279112469396 | 12.25596775932909 |
| H | 3.42810227927548  | 4.75718544455573 | 12.04162977620426 |
| H | 4.28582289467911  | 4.37511786492821 | 13.53944442556030 |
| C | 5.60198041340759  | 4.51405401121215 | 10.33602450292919 |
| H | 6.51762091105579  | 4.86795681762962 | 9.86192425822195  |
| H | 4.75841367568377  | 5.02093477817632 | 9.86222644577211  |
| H | 5.51009620805512  | 3.44702799143584 | 10.12212761506223 |
| C | 4.85226493477691  | 4.01990182992355 | 19.24152946843617 |
| H | 4.15446365793190  | 3.22119040587656 | 19.50531517064182 |
| H | 5.82348870471614  | 3.74024196437186 | 19.66168763111342 |
| C | 4.39869093441005  | 5.38997255005774 | 19.81951516393127 |
| H | 4.50563899046403  | 5.42141130504391 | 20.90707441396792 |
| H | 3.33565378519795  | 5.54313305717199 | 19.61041061714721 |
| C | 6.22121720372620  | 3.08437339266965 | 16.52947339305306 |
| H | 5.79269076501051  | 2.08078936673287 | 16.47336410907595 |
| H | 7.17326030068574  | 3.02083665327200 | 17.05776626105426 |
| H | 6.42340064371122  | 3.42053797188139 | 15.51178209954565 |
| C | 3.39232230571719  | 4.31369018636074 | 16.52235235306476 |
| H | 2.68504200840036  | 4.92288057250479 | 17.08903657424151 |
| H | 2.96754638987953  | 3.31322760430459 | 16.40793471622329 |
| H | 3.49160270554102  | 4.75553492022772 | 15.53055195530882 |
| C | 6.93729510891905  | 7.21570547507193 | 19.89469157117979 |
| H | 7.59613870580945  | 6.35272735822594 | 20.00779977169822 |
| H | 6.68454690328067  | 7.58653779097728 | 20.89196291026192 |
| H | 7.48223580906522  | 8.00189283496969 | 19.37303287283479 |
| C | 4.37457417066503  | 8.29919991067625 | 18.60883350338900 |
| H | 4.97347727711817  | 9.01119430777701 | 18.04022839703944 |
| H | 4.05644051794006  | 8.79127457471790 | 19.53143898870424 |
| H | 3.48546300817997  | 8.05210058644134 | 18.02580085277587 |
| C | 4.40711307546466  | 7.45681256973731 | 14.21033312742730 |
| H | 3.93068456074344  | 6.49622813023380 | 14.01556023390176 |
| H | 3.81735221426485  | 7.98416929589875 | 14.96124556931240 |
| H | 4.40342846135585  | 8.04050469094227 | 13.28379439628709 |

Atomic coordinates of the optimized structure of **10** ( $\eta^1$ ,  $S = 2$ )

|    |                  |                  |                   |
|----|------------------|------------------|-------------------|
| Fe | 4.87319766068948 | 3.83278464701006 | 13.32958876258251 |
| C  | 3.27675438929291 | 0.97677535740938 | 14.66987750085420 |
| H  | 2.28969095501170 | 0.99011726551296 | 15.15167713057926 |
| H  | 3.73885542171427 | 0.01016825268622 | 14.87055098048354 |

|   |                  |                   |                   |
|---|------------------|-------------------|-------------------|
| H | 3.12867591486229 | 1.05575698555349  | 13.59238014828949 |
| N | 3.73123468977468 | 3.38188425675007  | 14.74961057215787 |
| N | 5.55834176143919 | 5.56580211560430  | 12.59789140320624 |
| N | 5.71884819679512 | 2.72340346094450  | 11.87064197248872 |
| C | 7.05306791499877 | 7.00353614814665  | 11.28841857038503 |
| H | 6.25820802645581 | 7.71582176763717  | 11.06748278796414 |
| H | 7.71295397776753 | 6.93001477964060  | 10.42749019171026 |
| H | 7.61800331187084 | 7.41416457336708  | 12.12696568856770 |
| N | 4.15542225254598 | 2.03803212487553  | 15.13002307248985 |
| C | 6.48980474983485 | 5.65056981539876  | 11.65140146627337 |
| C | 6.97625366004264 | 4.55457411381879  | 10.93153236057205 |
| H | 7.70834005246752 | 4.78569101551042  | 10.17290058506357 |
| C | 6.52911654730757 | 3.22294549315041  | 10.94895782343975 |
| C | 6.96149302954121 | 2.36995964135844  | 9.77941736891052  |
| H | 7.05035794730376 | 1.31872702425819  | 10.03902452396651 |
| H | 7.90739446912762 | 2.72649238774535  | 9.37575594784113  |
| H | 6.21174629467054 | 2.44566535285306  | 8.98758453215435  |
| C | 4.96806314705713 | 6.76246810643601  | 13.10295678162123 |
| C | 5.56284642367376 | 7.45753371952070  | 14.16808461623892 |
| C | 4.96673263734623 | 8.63825348368205  | 14.60695390277449 |
| H | 5.41277317784549 | 9.18630166215617  | 15.42680399624983 |
| C | 3.81012522435224 | 9.11966437488833  | 14.01511430744345 |
| H | 3.36592502694617 | 10.04466550927841 | 14.36102265678830 |
| C | 3.20419616464248 | 8.39606848294055  | 12.99779608898580 |
| H | 2.27950973554495 | 8.75893864236870  | 12.57042418387993 |
| C | 3.75226322490405 | 7.20072970436038  | 12.53943551753202 |
| C | 6.78890900302565 | 6.91637200400488  | 14.88030181796741 |
| H | 7.21100887474904 | 6.12581400678374  | 14.26019154219028 |
| C | 6.37512687401606 | 6.28130918396110  | 16.21451548944415 |
| H | 7.24143513404679 | 5.85540112039696  | 16.72495401991591 |
| H | 5.64632765501124 | 5.48629272150744  | 16.05789082769860 |
| H | 5.92495823431805 | 7.02814491013526  | 16.87260469354265 |
| C | 7.87601856598936 | 7.97415341065854  | 15.09403790191308 |
| H | 7.54651025622416 | 8.75487061484044  | 15.78236585992910 |
| H | 8.15760484121649 | 8.45362248831220  | 14.15470700806448 |
| H | 8.76841321621567 | 7.51325927870283  | 15.52266141777176 |
| C | 3.04258024064490 | 6.37578462298838  | 11.47773046987723 |
| H | 3.31038827950990 | 5.33188430902765  | 11.65597355495907 |
| C | 1.51815619339410 | 6.47246280090285  | 11.56915195794374 |
| H | 1.16453632560563 | 6.25010425942169  | 12.57702761224316 |
| H | 1.06073648221732 | 5.75734279669086  | 10.88394868475025 |
| H | 1.15506901493589 | 7.46442713096546  | 11.29315106494446 |
| C | 3.51907943938933 | 6.72059895464075  | 10.06079495021080 |
| H | 3.32262875780392 | 7.77129096497659  | 9.83320085402824  |
| H | 2.99181891418077 | 6.10921882905946  | 9.32450473448536  |
| H | 4.58628884461948 | 6.54033532163739  | 9.94077764196532  |

|    |                   |                   |                   |
|----|-------------------|-------------------|-------------------|
| C  | 5.20974347800319  | 1.39946392375581  | 11.71223605465937 |
| C  | 5.82402788995143  | 0.33271684426252  | 12.39520760996547 |
| C  | 5.29492718648393  | -0.94465861500522 | 12.22892040245222 |
| H  | 5.75057705814402  | -1.78261439848479 | 12.73733569241119 |
| C  | 4.17739782054474  | -1.16569104514257 | 11.43567652839974 |
| H  | 3.78016611810566  | -2.16721252931487 | 11.32632630039967 |
| C  | 3.56480617477545  | -0.09977582157673 | 10.79787198595021 |
| H  | 2.68076337865845  | -0.27301590234501 | 10.19772137784736 |
| C  | 4.06645981149261  | 1.19510025824270  | 10.92081926094891 |
| C  | 7.02079941142790  | 0.57069671241853  | 13.30134288071575 |
| H  | 6.86341695564359  | 1.54212350073196  | 13.77408894507677 |
| C  | 8.34714928953177  | 0.64357541880702  | 12.53035354997365 |
| H  | 8.50652629459654  | -0.26948822291615 | 11.95139179232305 |
| H  | 9.17907989758164  | 0.74890566628535  | 13.23055047492366 |
| H  | 8.38091888582300  | 1.49001643716111  | 11.84843643590308 |
| C  | 7.13989915282995  | -0.47230194700878 | 14.41298745144111 |
| H  | 6.19939417852953  | -0.59527826717301 | 14.94755713266556 |
| H  | 7.90262443992228  | -0.16501627502410 | 15.12988218679422 |
| H  | 7.43885372447625  | -1.44698844587472 | 14.02136253104542 |
| C  | 3.34297329364895  | 2.34871738776172  | 10.24852639373353 |
| H  | 3.98233761622778  | 3.22815815594698  | 10.30916573377384 |
| C  | 3.06528410988393  | 2.08815870416504  | 8.76447820895650  |
| H  | 3.98111281668707  | 1.83199542512219  | 8.22862997855538  |
| H  | 2.63692331478612  | 2.97943768982866  | 8.30104776043478  |
| H  | 2.35633431961832  | 1.26989279112318  | 8.62360886037422  |
| C  | 2.04644240003160  | 2.67443138524691  | 11.00155403396754 |
| H  | 1.36827767846652  | 1.81801934590415  | 10.99532017983213 |
| H  | 1.53315666333106  | 3.51723557268911  | 10.53513432319167 |
| H  | 2.25159764804378  | 2.93194491071731  | 12.04136899685278 |
| Si | 2.37057683128681  | 4.03740647514592  | 15.61214609765584 |
| Si | 4.91758221823543  | 2.05583876690651  | 16.70935706482739 |
| C  | 0.70923713645992  | 3.63298026584563  | 14.82140589933167 |
| H  | -0.11372147270025 | 4.05845581029977  | 15.40350360882665 |
| H  | 0.54801862119529  | 2.55618116587045  | 14.74395302614241 |
| H  | 0.65489821468798  | 4.05077791209575  | 13.81280963737733 |
| C  | 2.50840261623131  | 5.90197473674726  | 15.70425688752174 |
| H  | 2.60409573087616  | 6.36231638898695  | 14.72181870893344 |
| H  | 3.36951253913906  | 6.21436633641626  | 16.29536341431580 |
| H  | 1.60890737359893  | 6.30959742072416  | 16.17417369061989 |
| C  | 2.47534690801433  | 3.31480540548572  | 17.35362936365431 |
| H  | 1.87318325112937  | 3.92415195094029  | 18.03617173509430 |
| H  | 2.02888567074320  | 2.31491579804470  | 17.37124588874109 |
| C  | 3.95144178631761  | 3.25263212158819  | 17.80424546101649 |
| H  | 4.03926626203335  | 2.93272662469626  | 18.84874313654079 |
| H  | 4.40195670382202  | 4.24818332431005  | 17.75484204966499 |
| C  | 6.70862473219610  | 2.58559221221408  | 16.55681794481281 |

|   |                  |                   |                   |
|---|------------------|-------------------|-------------------|
| H | 6.80269670505195 | 3.42381051345916  | 15.86538013330455 |
| H | 7.33243556824026 | 1.77068343612088  | 16.18885405749072 |
| H | 7.10271660602230 | 2.90447353023430  | 17.52556506659531 |
| C | 4.80663686642327 | 0.34419538159599  | 17.47663971990563 |
| H | 5.31878431955743 | 0.35013823232411  | 18.44284299520900 |
| H | 5.26512000112553 | -0.43308207843729 | 16.86496771396109 |
| H | 3.76537067012410 | 0.06549961360264  | 17.65551608954614 |

Atomic coordinates of the optimized structure of **10** ( $\eta^2$ ,  $S = 2$ )

|    |                  |                  |                   |
|----|------------------|------------------|-------------------|
| Fe | 5.15434968251649 | 3.75170562562079 | 13.49068195161864 |
| N  | 5.58462222455378 | 5.54345392206986 | 12.64827688856025 |
| N  | 5.76722373515064 | 2.77091078604238 | 11.80622266159649 |
| C  | 6.93650109095302 | 7.07501358961140 | 11.27684642325277 |
| H  | 6.09868245004920 | 7.74787440394947 | 11.09486906378659 |
| H  | 7.55704337796053 | 7.03675923672959 | 10.38482717351407 |
| H  | 7.52027366737614 | 7.51388917795007 | 12.08718507844491 |
| C  | 6.46037849160359 | 5.69008824592558 | 11.65363185122846 |
| C  | 6.97143444372938 | 4.63426898820826 | 10.89049473834064 |
| H  | 7.67768020728837 | 4.91184600182819 | 10.12325223363161 |
| C  | 6.57525518796400 | 3.28963926597589 | 10.89461207571074 |
| C  | 7.07961067395013 | 2.42379278336918 | 9.76580858483454  |
| H  | 7.58533470471495 | 1.53685927623444 | 10.14715689398252 |
| H  | 7.76789154498238 | 2.97664630422795 | 9.13083976547741  |
| H  | 6.24747432723185 | 2.07246218398830 | 9.15323462333962  |
| C  | 4.98142100788878 | 6.72433621527957 | 13.17640524674444 |
| C  | 5.61518007331977 | 7.45512889982234 | 14.19337996629114 |
| C  | 5.00519156286404 | 8.61949292032945 | 14.65703289466236 |
| H  | 5.47938078867030 | 9.19215783547995 | 15.44355749801823 |
| C  | 3.80501973022155 | 9.05987745296811 | 14.12292980510773 |
| H  | 3.35102439755225 | 9.97427692142449 | 14.48421206531178 |
| C  | 3.17581132183810 | 8.31451492329652 | 13.13559887698419 |
| H  | 2.22427312704703 | 8.65136156029232 | 12.74791477669565 |
| C  | 3.73407172214596 | 7.13042223436599 | 12.66094937221342 |
| C  | 6.91358022036212 | 6.97737282757742 | 14.81597444845327 |
| H  | 7.34496796623073 | 6.22999028403576 | 14.15034038952051 |
| C  | 6.62739237484856 | 6.28305744339605 | 16.15200212043404 |
| H  | 7.55170363492853 | 5.90848954997978 | 16.59687499380752 |
| H  | 5.95052632209042 | 5.44012102067995 | 16.01282478377101 |
| H  | 6.16539604701483 | 6.97750534372897 | 16.85797761197965 |
| C  | 7.94673626891086 | 8.09428937979240 | 14.99241048571013 |
| H  | 7.62476884433015 | 8.82707265516436 | 15.73493473317635 |
| H  | 8.12830693605676 | 8.62474628628719 | 14.05582942930505 |
| H  | 8.89469136304783 | 7.67473680322047 | 15.33563989424782 |
| C  | 2.99948181229830 | 6.27561915053292 | 11.64015595855327 |
| H  | 3.26171763476247 | 5.23844208670061 | 11.85739156778575 |
| C  | 1.47733549677183 | 6.39712688940022 | 11.74433585488028 |

|    |                   |                   |                   |
|----|-------------------|-------------------|-------------------|
| H  | 1.12868716815663  | 6.23286992926951  | 12.76453040072136 |
| H  | 1.00263867121889  | 5.65530136257111  | 11.10132064512248 |
| H  | 1.12606169370696  | 7.37927398806440  | 11.42144846463316 |
| C  | 3.45047202771789  | 6.55593411354526  | 10.20011528141326 |
| H  | 3.27431842440906  | 7.60208187270314  | 9.93762717606513  |
| H  | 2.88754530307399  | 5.93186510279274  | 9.50183080083579  |
| H  | 4.50740833880901  | 6.33958007186730  | 10.05834849616654 |
| C  | 5.28086676654171  | 1.44283802536628  | 11.64124453213778 |
| C  | 5.97601055105616  | 0.36181061623140  | 12.21229209005387 |
| C  | 5.38975598467371  | -0.90152417799662 | 12.17054729595329 |
| H  | 5.90255982208379  | -1.74068867052783 | 12.62380628008926 |
| C  | 4.16422414372967  | -1.10410544456120 | 11.55266869990274 |
| H  | 3.72052928040822  | -2.09178985167049 | 11.53519022127203 |
| C  | 3.52097214071247  | -0.03971274110435 | 10.93760186191540 |
| H  | 2.57787520105831  | -0.20787513295993 | 10.43237559621988 |
| C  | 4.06459340945715  | 1.24197024463004  | 10.96252832097415 |
| C  | 7.34123791892297  | 0.54526553854944  | 12.85158927593875 |
| H  | 7.66203347132929  | 1.56685793241798  | 12.64979642355398 |
| C  | 8.38776720448251  | -0.39954529250893 | 12.24797534730834 |
| H  | 8.16261647732284  | -1.44260003947451 | 12.47961879793149 |
| H  | 9.37603117925414  | -0.17543821278235 | 12.65557831480879 |
| H  | 8.43798377479335  | -0.30303204592456 | 11.16185890345082 |
| C  | 7.27368826795035  | 0.38399183106512  | 14.37163921929980 |
| H  | 6.55932566768342  | 1.08741894487323  | 14.79285243447191 |
| H  | 8.25150915014168  | 0.56738039817833  | 14.82327351218266 |
| H  | 6.95966606570363  | -0.62626770094361 | 14.64434553426138 |
| C  | 3.34988122529809  | 2.38132269720652  | 10.25495378826680 |
| H  | 3.99024167220348  | 3.26027124496714  | 10.31212397607729 |
| C  | 3.12771042390792  | 2.06915778269573  | 8.76941669342577  |
| H  | 4.06354482206965  | 1.80367182218651  | 8.27469390967244  |
| H  | 2.70805370534178  | 2.93930758688079  | 8.25984676077908  |
| H  | 2.43296077427964  | 1.23715813795112  | 8.63587017098481  |
| C  | 2.02393935237469  | 2.74141859316354  | 10.93363386966802 |
| H  | 1.35799885510568  | 1.87712233632974  | 10.98333916199518 |
| H  | 1.51385806057303  | 3.52735649841940  | 10.37377219595874 |
| H  | 2.18855489763857  | 3.10286840459227  | 11.94758350777883 |
| Si | 2.15846489698765  | 3.85857447376433  | 15.50724602405912 |
| Si | 4.88280939743992  | 2.40684874878506  | 16.79468300785411 |
| C  | 0.48250818992810  | 3.67287888208085  | 14.69160045773390 |
| H  | -0.25607198983829 | 4.28846885662160  | 15.21149311916918 |
| H  | 0.13135595746972  | 2.63959550539968  | 14.71200236456573 |
| H  | 0.51660491141517  | 4.00024679513286  | 13.65045867433133 |
| C  | 2.64175398932727  | 5.65140600565297  | 15.62054740501129 |
| H  | 2.58071677325607  | 6.16677143527906  | 14.66581734026229 |
| H  | 3.65400887958158  | 5.77701851965735  | 16.00029910789019 |
| H  | 1.95843752631694  | 6.14925885776243  | 16.31462491179456 |

|   |                  |                   |                   |
|---|------------------|-------------------|-------------------|
| C | 2.17366918983406 | 3.13383492250616  | 17.24566172756577 |
| H | 1.42409743263225 | 3.65273540585588  | 17.85430890499451 |
| H | 1.84895994503248 | 2.08899685244243  | 17.20257981744389 |
| C | 3.57936377461338 | 3.22790393851055  | 17.88975643032812 |
| H | 3.58084770003312 | 2.77619916713752  | 18.88820020710619 |
| H | 3.85360774311395 | 4.27855132038146  | 18.02722056140715 |
| C | 6.62296985939829 | 2.82978718762054  | 17.34868632344140 |
| H | 6.86584510494651 | 2.27955111568515  | 18.26131185342406 |
| H | 7.35946301513581 | 2.55723149390261  | 16.59010268235907 |
| H | 6.73210005218611 | 3.89318958206703  | 17.55728133894743 |
| C | 4.63118581649243 | 0.54629784891228  | 17.01158371594714 |
| H | 4.98161478494624 | 0.25122651135794  | 18.00555236176923 |
| H | 5.17909864605345 | -0.03956599405992 | 16.27384166606143 |
| H | 3.57752991580451 | 0.27010500039785  | 16.94238195360134 |
| N | 4.67677817444962 | 2.99055945247774  | 15.17733749138145 |
| N | 3.33436922258121 | 2.92490563966033  | 14.54879240322663 |
| C | 2.92427998633801 | 1.55274238603245  | 14.21631700523270 |
| H | 2.10627049675698 | 1.57740689262876  | 13.49930704155032 |
| H | 2.59421274240467 | 0.98973855899207  | 15.09509784105686 |
| H | 3.75969150894610 | 1.02197039580444  | 13.76775551821763 |

Atomic coordinates of the optimized structure of **10** ( $\eta^2$ ,  $S = 1$ )

|    |                  |                  |                   |
|----|------------------|------------------|-------------------|
| Fe | 4.95596774754971 | 3.67793984728505 | 13.41297810783837 |
| C  | 3.15474731448115 | 1.46069409103625 | 14.38455058715096 |
| H  | 2.38903022729881 | 1.25782317900279 | 15.13792627519037 |
| H  | 3.68610185359488 | 0.53712818937660 | 14.16321023696572 |
| H  | 2.66932873320587 | 1.80412746399952 | 13.47743845735100 |
| N  | 3.68384043103995 | 3.87020697567689 | 14.73717331288047 |
| N  | 5.53099761563197 | 5.38349902313257 | 12.71856630655618 |
| N  | 5.76172055248574 | 2.68864672680762 | 11.92813734365489 |
| C  | 6.89284884946624 | 6.95492749280203 | 11.39302791373745 |
| H  | 6.05387261948818 | 7.61555734113927 | 11.17514601928680 |
| H  | 7.55176051455027 | 6.92716640328022 | 10.52826542615182 |
| H  | 7.43364430161424 | 7.40187816704282 | 12.22708539963946 |
| N  | 4.11526915769240 | 2.48191221935360 | 14.83929826175408 |
| C  | 6.42616443030837 | 5.56036516718844 | 11.74316610137793 |
| C  | 6.95491533593239 | 4.52386492921672 | 10.97529277046360 |
| H  | 7.65608433974078 | 4.80468821432693 | 10.20383315127001 |
| C  | 6.54562510106806 | 3.18573444002486 | 10.98474135897343 |
| C  | 6.97181534500047 | 2.35094189598727 | 9.79945397266701  |
| H  | 6.95692256748394 | 1.28461567769846 | 10.00458440129720 |
| H  | 7.97078797051198 | 2.64061322792756 | 9.47467211050192  |
| H  | 6.29140476474098 | 2.53687954850190 | 8.96507999179115  |
| C  | 4.91591000467843 | 6.56758162992793 | 13.23650144117037 |
| C  | 5.51853095886060 | 7.29231426022540 | 14.27539352739347 |
| C  | 4.95555788725351 | 8.51089555151498 | 14.65346618636577 |

|   |                  |                   |                   |
|---|------------------|-------------------|-------------------|
| H | 5.41450073036775 | 9.08463325001318  | 15.44882210489152 |
| C | 3.82190213145287 | 9.00065975805288  | 14.02681839998152 |
| H | 3.40639826138539 | 9.95683470846189  | 14.31988523501576 |
| C | 3.19673718642589 | 8.24109773778708  | 13.04680564475774 |
| H | 2.28512122252614 | 8.60884795306454  | 12.59590661893121 |
| C | 3.71252156745584 | 7.00943118700154  | 12.65107481179203 |
| C | 6.73503670926074 | 6.76526672022770  | 15.01478638764859 |
| H | 7.08273862007419 | 5.88005008409100  | 14.48219512037491 |
| C | 6.33409788260398 | 6.32889230477492  | 16.42942241807652 |
| H | 7.18708064947946 | 5.89832851581877  | 16.95875462028372 |
| H | 5.54121691693486 | 5.58455215924701  | 16.38765899022019 |
| H | 5.96998017461869 | 7.18020497203930  | 17.00932189398577 |
| C | 7.89007432355984 | 7.77056303020577  | 15.07261256526119 |
| H | 7.61932027161331 | 8.65593469293798  | 15.65173404440372 |
| H | 8.18884602276147 | 8.10378474362355  | 14.07773367048204 |
| H | 8.76007188664023 | 7.31594362705103  | 15.55185681871707 |
| C | 2.98301732135540 | 6.15064768230797  | 11.63042613469223 |
| H | 3.19377883194185 | 5.11283445755627  | 11.89758013548956 |
| C | 1.46442023865095 | 6.33655747203988  | 11.68016010369894 |
| H | 1.08529747141289 | 6.25041589068744  | 12.69865310870934 |
| H | 0.97821389143456 | 5.57393376125815  | 11.06990917254326 |
| H | 1.16182554007746 | 7.30977903399350  | 11.28770097208658 |
| C | 3.48806776562425 | 6.36349326648897  | 10.19732627997167 |
| H | 3.36097345986398 | 7.40643123080086  | 9.89599904827447  |
| H | 2.92043437690936 | 5.73970676558855  | 9.50238652790841  |
| H | 4.53912263306767 | 6.10150330838140  | 10.09327071042792 |
| C | 5.26198719690053 | 1.35924428825522  | 11.78837800083842 |
| C | 5.90408222659733 | 0.29875043275297  | 12.45929118362977 |
| C | 5.35690670164605 | -0.97740789153187 | 12.35057409353594 |
| H | 5.82916995774531 | -1.80801570732543 | 12.85624283502355 |
| C | 4.20509990852412 | -1.20694814768960 | 11.60828983920823 |
| H | 3.79347500776585 | -2.20649303864107 | 11.54224225537821 |
| C | 3.58783515435769 | -0.15446971131701 | 10.95311256583349 |
| H | 2.69145829906070 | -0.33848357303749 | 10.37415624461614 |
| C | 4.10399604642649 | 1.13920038020724  | 11.02240392760869 |
| C | 7.15797721533030 | 0.54741769659881  | 13.28216615290419 |
| H | 7.01657988999363 | 1.51255268538971  | 13.77288195661288 |
| C | 8.42530034809096 | 0.66200420337909  | 12.42069437006372 |
| H | 8.55822008765044 | -0.23599093811654 | 11.81238454584424 |
| H | 9.30150401567148 | 0.76568547256340  | 13.06483542689462 |
| H | 8.39880809330699 | 1.52320295761338  | 11.75975925217888 |
| C | 7.39725895774677 | -0.50870456014276 | 14.36269935684972 |
| H | 6.51023625459337 | -0.68737993529272 | 14.96675783228929 |
| H | 8.19963721941788 | -0.18300600683597 | 15.02711695961594 |
| H | 7.70553329386008 | -1.46190788157487 | 13.92746956680607 |
| C | 3.41128859113752 | 2.26238249561493  | 10.26669278475516 |

|    |                   |                   |                   |
|----|-------------------|-------------------|-------------------|
| H  | 4.01730010869059  | 3.15996653938504  | 10.37361037353050 |
| C  | 3.30158945464825  | 1.94935207868806  | 8.76847306422435  |
| H  | 4.27242629017946  | 1.69281868131932  | 8.34274623757963  |
| H  | 2.91021092100004  | 2.81557545337988  | 8.23065644926902  |
| H  | 2.62546766284390  | 1.11127677426937  | 8.58622602637987  |
| C  | 2.02765114575985  | 2.58189124430293  | 10.84550387790739 |
| H  | 1.38174492811249  | 1.70101319467403  | 10.84140775125042 |
| H  | 1.54217914175671  | 3.35840005542180  | 10.25108697881142 |
| H  | 2.09988943438893  | 2.94722655363679  | 11.86964283977129 |
| Si | 2.32504102116362  | 4.38205747182769  | 15.68191904669149 |
| Si | 4.90603495884580  | 2.22696643221795  | 16.43748340183269 |
| C  | 0.66420476790071  | 3.98098663151117  | 14.89016413268168 |
| H  | -0.16019875769797 | 4.33345627777872  | 15.51731151207583 |
| H  | 0.53994666842542  | 2.90590192046436  | 14.74650465847224 |
| H  | 0.56992904028034  | 4.45951897899997  | 13.91344922292561 |
| C  | 2.41518273911583  | 6.21868836444392  | 15.99992165219142 |
| H  | 2.48499612014645  | 6.78698613601801  | 15.07422501933251 |
| H  | 3.28229096112285  | 6.47475631910752  | 16.60905760174169 |
| H  | 1.51589990749097  | 6.54337252683140  | 16.53078920001690 |
| C  | 2.48608857048652  | 3.43546882294605  | 17.31281580917240 |
| H  | 1.93787162758861  | 3.96753680165004  | 18.09726461167225 |
| H  | 2.00770003557908  | 2.45392424291084  | 17.22919904083437 |
| C  | 3.97435324132725  | 3.27738041171799  | 17.68899460898083 |
| H  | 4.09018044844195  | 2.80193308117150  | 18.67020164792806 |
| H  | 4.44689571344032  | 4.25892394079031  | 17.77207900273684 |
| C  | 6.71182237489334  | 2.69618723171681  | 16.34383966665376 |
| H  | 6.85271502751317  | 3.59890722830861  | 15.74887235674445 |
| H  | 7.31523874107370  | 1.90072174439266  | 15.90839350217053 |
| H  | 7.09038436067400  | 2.89572373335637  | 17.34988913234675 |
| C  | 4.68635536017055  | 0.42826425984774  | 16.92407513051857 |
| H  | 5.32271552230811  | 0.20454982380242  | 17.78438132046688 |
| H  | 4.94352581440994  | -0.26866188335453 | 16.12804635610297 |
| H  | 3.65210547091606  | 0.23433572961757  | 17.21723941643792 |

Atomic coordinates of the optimized structure of **10** ( $\eta^2$ ,  $S = 1$ ) second conformer

|    |                  |                  |                   |
|----|------------------|------------------|-------------------|
| Fe | 4.97635922348345 | 3.82155158703897 | 13.39190277746162 |
| N  | 5.44508494542444 | 5.49690213799393 | 12.52799794822107 |
| N  | 5.83532044186108 | 2.77053841915609 | 11.99632686165594 |
| C  | 6.77986089321531 | 7.04776327818964 | 11.15206921399567 |
| H  | 5.91976561590585 | 7.69932358574130 | 11.00188310511451 |
| H  | 7.35628263982505 | 7.00441696286509 | 10.23060342759139 |
| H  | 7.39909721817081 | 7.51420479160027 | 11.91984538088661 |
| C  | 6.35687148748677 | 5.65974539892655 | 11.57214325606526 |
| C  | 6.94367213274895 | 4.59122829014535 | 10.89535868049369 |
| H  | 7.64413727554715 | 4.83935357061472 | 10.11187641757060 |
| C  | 6.60892585109944 | 3.24050274445600 | 11.02489991562809 |



|   |                  |                   |                   |
|---|------------------|-------------------|-------------------|
| C | 7.12628729674412 | 2.33233751366133  | 9.93173225963909  |
| H | 8.14398212038471 | 2.61868258442013  | 9.66660007120757  |
| H | 6.51201675263578 | 2.45072309238651  | 9.03712256624609  |
| H | 7.11324098429972 | 1.28293377498018  | 10.20801978355375 |
| C | 4.84934809073922 | 6.66330020129222  | 13.08993545147033 |
| C | 5.53434230454046 | 7.39532359637816  | 14.07621226074244 |
| C | 4.93460405957716 | 8.54792872615004  | 14.57924589046421 |
| H | 5.44229002904918 | 9.12574955172422  | 15.34033962323066 |
| C | 3.69544245855892 | 8.96862931473259  | 14.12169132949040 |
| H | 3.24740157524370 | 9.87078251141036  | 14.51937506010225 |
| C | 3.01809250548318 | 8.22025007360233  | 13.16811689418799 |
| H | 2.04132635926030 | 8.54663717786737  | 12.83815257339412 |
| C | 3.57147530747138 | 7.05430285703855  | 12.64457090172885 |
| C | 6.88214799542429 | 6.93543274120149  | 14.60920109202201 |
| H | 7.31204423195695 | 6.25075246738125  | 13.87957871224964 |
| C | 6.71636712273718 | 6.14214655187827  | 15.91211538526872 |
| H | 7.68856698907951 | 5.79823536960310  | 16.27299222452210 |
| H | 6.08370795629392 | 5.26762574980568  | 15.75712925942475 |
| H | 6.26369321749336 | 6.76127461123491  | 16.69033827963338 |
| C | 7.87554578048635 | 8.08530623581601  | 14.80058487987795 |
| H | 7.57030074067207 | 8.75481214362273  | 15.60721878838003 |
| H | 7.97922036976161 | 8.68176725166107  | 13.89213615289506 |
| H | 8.85842261342560 | 7.68710801761539  | 15.06070926345902 |
| C | 2.82232298562188 | 6.20956884080170  | 11.62785067268763 |
| H | 3.07010160186811 | 5.16996785136849  | 11.85106813597612 |
| C | 1.30304434193762 | 6.35152816749638  | 11.72469805765451 |
| H | 0.95408028296225 | 6.22957423383510  | 12.75010429619648 |
| H | 0.82175801183125 | 5.59078445768396  | 11.10771381466817 |
| H | 0.96274703826021 | 7.32596074802331  | 11.36712619532102 |
| C | 3.28108183460923 | 6.47911227331106  | 10.18786006792337 |
| H | 3.12586933342730 | 7.52809728804194  | 9.92329291530712  |
| H | 2.70587854872157 | 5.86555835828432  | 9.49051117183018  |
| H | 4.33323940160766 | 6.24131752698993  | 10.04737602408395 |
| C | 5.34681075610238 | 1.43128177505135  | 11.89191374331342 |
| C | 5.92758786152908 | 0.40299553595571  | 12.66193641734212 |
| C | 5.35961741950942 | -0.86702453779176 | 12.59426898677784 |
| H | 5.77584775891950 | -1.67203048711321 | 13.18232245467862 |
| C | 4.26008571852749 | -1.12650294199025 | 11.78597265700745 |
| H | 3.83117517424993 | -2.12052553038980 | 11.75785057424366 |
| C | 3.72590801703419 | -0.11436735131822 | 11.00702642422326 |
| H | 2.88035038712772 | -0.32474314851847 | 10.36428139142232 |
| C | 4.26072438497319 | 1.17296101673121  | 11.03388451307160 |
| C | 7.14337413347840 | 0.67293083719412  | 13.53528401563876 |
| H | 6.93202521820943 | 1.59905580416144  | 14.07462038723755 |
| C | 8.42628416449474 | 0.90997675851720  | 12.72154853501964 |
| H | 8.62469639356339 | 0.06629590883975  | 12.05605038309073 |

|    |                   |                   |                   |
|----|-------------------|-------------------|-------------------|
| H  | 9.27650675965835  | 1.01009237404967  | 13.39995251347676 |
| H  | 8.37403893952482  | 1.81524332700366  | 12.12525657622240 |
| C  | 7.42400503760142  | -0.42974779909716 | 14.55787696011317 |
| H  | 6.55887293960712  | -0.65823738823668 | 15.17671068711785 |
| H  | 8.23500189238497  | -0.11832028349927 | 15.21787456386227 |
| H  | 7.74443898049014  | -1.35167802746775 | 14.06677376112613 |
| C  | 3.66080266392911  | 2.24135139876309  | 10.12950062011491 |
| H  | 4.27806485920266  | 3.13462851641867  | 10.20189330011546 |
| C  | 3.65653654699396  | 1.79681818927768  | 8.66028260339847  |
| H  | 4.64454006323341  | 1.46709119748609  | 8.33746518686753  |
| H  | 3.34510390979845  | 2.62406699059796  | 8.01878293254376  |
| H  | 2.96079800043939  | 0.97100189059039  | 8.49756706762682  |
| C  | 2.24574076791878  | 2.64422151199078  | 10.55951319143454 |
| H  | 1.57436520473937  | 1.78265598851813  | 10.57394511869484 |
| H  | 1.83733074795543  | 3.38018751171798  | 9.86352887737934  |
| H  | 2.24610764054891  | 3.08758906622839  | 11.55245710668006 |
| Si | 2.25253790115546  | 4.21514676103174  | 15.78396050084034 |
| Si | 4.81355235175391  | 2.07911064819160  | 16.41850660766653 |
| C  | 0.47414307063990  | 4.36824167443977  | 15.21337229188344 |
| H  | -0.06015684365227 | 5.05761901720777  | 15.87231684843604 |
| H  | -0.04346158193752 | 3.40786458489879  | 15.24478724062655 |
| H  | 0.40378423505246  | 4.75812821556079  | 14.19696039209378 |
| C  | 2.99885501978778  | 5.88980249096765  | 16.07115799904362 |
| H  | 2.97225596317555  | 6.51135821977484  | 15.17942290184889 |
| H  | 4.03072550018812  | 5.82358649917808  | 16.40707233403390 |
| H  | 2.42367069125731  | 6.39431436681229  | 16.85290332432134 |
| C  | 2.35030549333730  | 3.20216073555510  | 17.36575934641783 |
| H  | 1.80422733022297  | 3.72452302829519  | 18.15974275007806 |
| H  | 1.81972836388806  | 2.25605942945308  | 17.21413042608125 |
| C  | 3.81461452600263  | 2.93586222042933  | 17.77543811948848 |
| H  | 3.86224868921390  | 2.33470294355722  | 18.69084623831395 |
| H  | 4.31187039068303  | 3.88322249354539  | 18.00718710676577 |
| C  | 6.62925034257541  | 2.24395814848255  | 16.84980927166248 |
| H  | 6.81605643135904  | 1.76854518635842  | 17.81686836543378 |
| H  | 7.29633477833678  | 1.78704525384528  | 16.12240438286499 |
| H  | 6.89539252538506  | 3.29874806863593  | 16.93618421692909 |
| C  | 4.26838908246438  | 0.27329977632920  | 16.38387116874903 |
| H  | 4.76606574743497  | -0.30557926159459 | 17.16698729817375 |
| H  | 4.48243663737767  | -0.19346005400827 | 15.42238969118165 |
| H  | 3.19130875387671  | 0.19799487656758  | 16.55221218183594 |
| N  | 4.51702552197916  | 2.92738397079163  | 14.93465744811885 |
| N  | 3.15144384859603  | 3.28917499505659  | 14.54651940364726 |
| C  | 2.40254699499802  | 2.12145325610703  | 14.04313160014452 |
| H  | 1.50483500133403  | 2.45440392533870  | 13.52509393936350 |
| H  | 2.10493338782147  | 1.44564024164740  | 14.85190688239765 |
| H  | 3.02436953701102  | 1.56467755584307  | 13.34813113218634 |

Atomic coordinates of the optimized structure of a methyl radical

|   |                   |                  |                   |
|---|-------------------|------------------|-------------------|
| C | -5.19615443433622 | 3.47387760441552 | 0.23495246789029  |
| H | -4.17790844080107 | 3.34433709136090 | -0.09972390865425 |
| H | -5.70528587836262 | 4.41071768997067 | 0.06541336385098  |
| H | -5.70526124650007 | 2.66692761425290 | 0.74017807691298  |

Atomic coordinates of the optimized structure of ethane

|   |                   |                  |                   |
|---|-------------------|------------------|-------------------|
| C | -8.33239840042945 | 4.48041122265558 | 0.00001298888531  |
| C | -8.32112908821704 | 2.95372877256664 | -0.00001302978574 |
| H | -8.62126132258371 | 4.87480328481269 | -0.97676229135219 |
| H | -7.34640097296624 | 4.88415418533055 | 0.24067665268774  |
| H | -9.03814424627525 | 4.87177534503580 | 0.73610015369898  |
| H | -7.61538356036049 | 2.56236445867380 | -0.73610037325834 |
| H | -9.30712662023826 | 2.54998588563879 | -0.24067628536085 |
| H | -8.03226578892953 | 2.55933684528614 | 0.97676218448510  |

Atomic coordinates of the optimized structure of **Me-TS** ( $S = 1$ )

|    |                   |                   |                   |
|----|-------------------|-------------------|-------------------|
| Fe | -0.05825614736244 | 0.22021562070150  | -0.39663873730942 |
| Si | -1.91567963356708 | -2.86358207029337 | 1.95733288564635  |
| Si | -1.56139285290973 | -0.32973826239262 | 3.49818518093611  |
| N  | -0.78196101717620 | -0.56580877064471 | 0.91258847780003  |
| N  | -1.39398613653665 | -1.16846666541284 | 1.94544833841931  |
| N  | 0.83448821763345  | -0.50035668008818 | -1.94904791112473 |
| N  | 0.54756565659088  | 2.02863700808693  | -0.73863571084567 |
| C  | -1.95093280734469 | -3.07409490363397 | 3.82857530424939  |
| H  | -2.58423635943788 | -3.90497803846139 | 4.15064505474569  |
| H  | -0.93453748309349 | -3.30362669092075 | 4.16368614956891  |
| C  | -2.41348596792461 | -1.72477036843419 | 4.43916262988777  |
| H  | -2.21815464636923 | -1.67617869186033 | 5.51393961833588  |
| H  | -3.49532848389973 | -1.61349922717986 | 4.31564978193707  |
| C  | -0.68942755301477 | -3.93897534050488 | 1.06156372676806  |
| H  | -0.56074621810819 | -3.61297333482529 | 0.02891950376686  |
| H  | -1.03176880094932 | -4.97682068279679 | 1.04443358412031  |
| H  | 0.28757656282630  | -3.90859819855003 | 1.54467477898161  |
| C  | -3.63285983381017 | -3.11874505291023 | 1.24394360463686  |
| H  | -4.34593891659959 | -2.41022722584408 | 1.67041491783793  |
| H  | -3.97888061694182 | -4.13014533107152 | 1.47735652726198  |
| H  | -3.65189481203872 | -3.00647943207243 | 0.15912253730746  |
| C  | 0.10224147703288  | 0.12961765200562  | 4.21184338748540  |
| H  | 0.79898130976642  | -0.71045338332604 | 4.19269400778169  |
| H  | -0.01309620667142 | 0.45829752747843  | 5.24847946875264  |
| H  | 0.54268790018600  | 0.95178693453954  | 3.64856203447716  |
| C  | -2.59557157163737 | 1.21908282964342  | 3.35612790379874  |
| H  | -2.10072849194102 | 1.95338084711678  | 2.71838354551235  |
| H  | -2.72568756647317 | 1.67539160311500  | 4.34153183142084  |
| H  | -3.58422450298600 | 1.00800892820255  | 2.94462378030700  |

|   |                   |                   |                   |
|---|-------------------|-------------------|-------------------|
| C | -2.29908921236327 | 0.04615601299165  | -0.17191965297493 |
| H | -2.75704588306769 | 0.69251600695175  | 0.56350757045377  |
| H | -2.28863059841238 | 0.52002307923566  | -1.15409791626731 |
| H | -2.78380184389420 | -0.91713606342793 | -0.22849088127613 |
| C | 1.77897214784297  | 3.85389188863364  | -1.84608388808455 |
| H | 1.17086144637465  | 4.54706499388487  | -1.27188837224434 |
| H | 1.82595736531740  | 4.18846244077218  | -2.88174453027164 |
| H | 2.79285082494626  | 3.89526205490487  | -1.44080323706927 |
| C | 1.26060319407122  | 2.43678398801641  | -1.77967962924188 |
| C | 1.63947559422671  | 1.58529314898080  | -2.82246375859274 |
| H | 2.18764557063201  | 2.03802974675974  | -3.63556573888454 |
| C | 1.49442763586983  | 0.19516741631213  | -2.86854649717916 |
| C | 2.20145057681930  | -0.51888397662687 | -3.99696247783425 |
| H | 3.18029878542360  | -0.86595351705478 | -3.65727070580694 |
| H | 2.35904440404203  | 0.15915612561580  | -4.83366156075181 |
| H | 1.65630008242400  | -1.39359228801542 | -4.34188576004656 |
| C | 0.36754391453856  | 2.88764951070082  | 0.38939195539911  |
| C | 1.40176375379442  | 2.98789201300377  | 1.33979421163696  |
| C | 1.17869290801279  | 3.74669318842847  | 2.48647114286813  |
| H | 1.95599152102882  | 3.81823907066668  | 3.23653710582230  |
| C | -0.02110615818771 | 4.41387785762562  | 2.68250154410639  |
| H | -0.17806635149518 | 4.99873080739015  | 3.58034307189018  |
| C | -1.01703867876329 | 4.33641203003955  | 1.72006010406147  |
| H | -1.94488107906407 | 4.87061646506686  | 1.87508522811369  |
| C | -0.84785163970079 | 3.57541790781738  | 0.56480802263010  |
| C | 2.73457780184289  | 2.28343527734665  | 1.14502638591361  |
| H | 2.78098481625956  | 1.93590389662303  | 0.11478649545953  |
| C | 2.84839778565428  | 1.04315131060178  | 2.03614648307028  |
| H | 2.82251380525211  | 1.31705263764045  | 3.09275438050427  |
| H | 3.78951369677073  | 0.52307063633607  | 1.84442091014659  |
| H | 2.03055195478075  | 0.35056482309938  | 1.84180203460817  |
| C | 3.92512465906355  | 3.22353265223978  | 1.36471997955354  |
| H | 3.84302114135384  | 4.12104815851582  | 0.74907469010309  |
| H | 4.85635245869458  | 2.71497503007610  | 1.10580262475169  |
| H | 4.00170800439732  | 3.53948415189179  | 2.40704505134383  |
| C | -1.93787767809589 | 3.52883362058420  | -0.49171417516689 |
| H | -1.79679707879247 | 2.60616367308795  | -1.05122082024575 |
| C | -3.35274744540556 | 3.51703120125596  | 0.09458596115748  |
| H | -3.46222165723379 | 2.76676357666558  | 0.87649320360779  |
| H | -4.07730555742995 | 3.29696928913569  | -0.69184715641778 |
| H | -3.61913715679637 | 4.48646704469736  | 0.52128272281714  |
| C | -1.80150079922534 | 4.69041567741793  | -1.48773603103259 |
| H | -1.86885547808039 | 5.65072574116946  | -0.97046520296805 |
| H | -2.60344716176426 | 4.64758244183150  | -2.22865446528577 |
| H | -0.85232913970626 | 4.65758580786121  | -2.01951508910974 |
| C | 0.80726028819258  | -1.92602046875921 | -2.05127923579265 |

|   |                   |                   |                   |
|---|-------------------|-------------------|-------------------|
| C | 1.84677288659770  | -2.68096049474615 | -1.48080866806439 |
| C | 1.82493960614428  | -4.06556883975045 | -1.63388525416984 |
| H | 2.61946554502347  | -4.66032135736052 | -1.20094973812504 |
| C | 0.79912106739204  | -4.69580330398717 | -2.32121761911087 |
| H | 0.80049013415981  | -5.77290546432532 | -2.43364069796655 |
| C | -0.24072194583483 | -3.94198117268909 | -2.84495853517099 |
| H | -1.04902382822301 | -4.44061227106688 | -3.36441737987322 |
| C | -0.26182952316812 | -2.55438354891214 | -2.71551412584585 |
| C | 2.95576387277806  | -2.03085199763399 | -0.67348997246476 |
| H | 2.84033118534290  | -0.95106581034763 | -0.75905567049255 |
| C | 2.81239753990495  | -2.39225443297345 | 0.81066326696621  |
| H | 1.84588336326055  | -2.06444493279945 | 1.19326527842734  |
| H | 3.59562676354801  | -1.91196121949330 | 1.39995184588771  |
| H | 2.89097122261105  | -3.47187444745825 | 0.95660310944910  |
| C | 4.35133922721623  | -2.39365365099060 | -1.19230119416266 |
| H | 4.55881266125260  | -3.45909362017275 | -1.07180213228441 |
| H | 5.11454002369972  | -1.84288138717467 | -0.63789111640032 |
| H | 4.45858331699831  | -2.15052964943723 | -2.25066389570256 |
| C | -1.41168740274791 | -1.75420103155294 | -3.30039684021557 |
| H | -1.35120699588576 | -0.75121275408011 | -2.88084025833279 |
| C | -2.77372258857117 | -2.34047689130859 | -2.91579767634528 |
| H | -2.95808576006852 | -3.29404295491374 | -3.41523397585347 |
| H | -3.57404390433318 | -1.65602550217631 | -3.20421760428836 |
| H | -2.83948599949606 | -2.50791925940085 | -1.84165023905103 |
| C | -1.29995762574598 | -1.62255854353030 | -4.82526811053994 |
| H | -0.38040270567687 | -1.11683577728686 | -5.11860688134920 |
| H | -2.14099252773981 | -1.04740727859282 | -5.21986550676625 |
| H | -1.31079764582895 | -2.60657909349706 | -5.30052070809185 |

Atomic coordinates of the optimized structure of **Me-TS** ( $S = 2$ )

|    |                   |                   |                    |
|----|-------------------|-------------------|--------------------|
| Fe | -0.13952489624654 | 0.30779339989887  | -0.345086781222695 |
| Si | -1.91426668865985 | -3.04616617944092 | 2.01616544957406   |
| Si | -1.57904144832144 | -0.40556939768536 | 3.37052752167793   |
| N  | -0.87440826748396 | -0.91026939194710 | 0.73491517093156   |
| N  | -1.42068330974729 | -1.34803981824480 | 1.87883206575844   |
| N  | 0.77278678932305  | -0.49862437687190 | -1.97565007447175  |
| N  | 0.57161859430473  | 2.14863533351988  | -0.68244803229621  |
| C  | -1.99242981941057 | -3.12438839770341 | 3.89809962708338   |
| H  | -2.64536543124587 | -3.91875182847841 | 4.26927455190204   |
| H  | -0.98614588329508 | -3.34921050317147 | 4.26599667083577   |
| C  | -2.43631771634373 | -1.72723053928172 | 4.40949716235940   |
| H  | -2.24333233684356 | -1.60619497560444 | 5.47903334032124   |
| H  | -3.51687792034831 | -1.61188249250208 | 4.27618523076098   |
| C  | -0.64555030376844 | -4.17350976188045 | 1.24699994516251   |
| H  | -0.48512548462085 | -3.91762893788914 | 0.19888227092726   |
| H  | -0.97601678531682 | -5.21444625205253 | 1.29433911428849   |

|   |                   |                   |                   |
|---|-------------------|-------------------|-------------------|
| H | 0.31407198755587  | -4.09480807159007 | 1.76002786945969  |
| C | -3.59331580441353 | -3.35607011735963 | 1.23968379961511  |
| H | -4.34905805758450 | -2.68168571032670 | 1.64816924980623  |
| H | -3.91472594870859 | -4.38357808564539 | 1.43289627225418  |
| H | -3.56357679082767 | -3.21722160032143 | 0.15725268698491  |
| C | 0.09115106195860  | 0.10018716895638  | 4.04128204896599  |
| H | 0.78639262549267  | -0.74069539275988 | 4.07619675324431  |
| H | -0.01393084577402 | 0.50400145921673  | 5.05198524141572  |
| H | 0.52968972437139  | 0.87962445339324  | 3.41866859907058  |
| C | -2.61340961081134 | 1.13519423035200  | 3.15180989757059  |
| H | -2.09852890407059 | 1.86178948122658  | 2.52215483025499  |
| H | -2.78308138275975 | 1.60818944577871  | 4.12330515471215  |
| H | -3.58351739560416 | 0.90962490463952  | 2.70643381525127  |
| C | -2.38320641332192 | 0.04809598857656  | -0.24302284496074 |
| H | -2.66930537469647 | 0.91577629147422  | 0.34142268076615  |
| H | -2.42045037424461 | 0.25901715133958  | -1.31338036308779 |
| H | -3.00661259408245 | -0.80318413150872 | -0.01212565775669 |
| C | 1.85788129549981  | 3.89029320420467  | -1.84773171345914 |
| H | 1.28950292663546  | 4.61366088226757  | -1.26900513520212 |
| H | 1.89665648490374  | 4.20974039781235  | -2.88815251476680 |
| H | 2.88060753109453  | 3.89397991241277  | -1.46317926660813 |
| C | 1.28175328766526  | 2.49690774131035  | -1.74675601953103 |
| C | 1.59879915686472  | 1.62080398303132  | -2.79300334286459 |
| H | 2.14716008963412  | 2.06279501297552  | -3.61195755033649 |
| C | 1.43255367243036  | 0.22661066925198  | -2.86721607796355 |
| C | 2.13543243466750  | -0.45715583279094 | -4.01763034740973 |
| H | 3.10318624202589  | -0.83611792413077 | -3.67982285460627 |
| H | 2.31394652454031  | 0.24366728853831  | -4.83057897523935 |
| H | 1.57401306298176  | -1.30976338734917 | -4.39077447804524 |
| C | 0.43124804811257  | 3.01315481838536  | 0.44058945349524  |
| C | 1.48087045073045  | 3.10607121309975  | 1.37528171457633  |
| C | 1.26994288888273  | 3.84294046735829  | 2.53869604824904  |
| H | 2.05873197855123  | 3.90861802461108  | 3.27688379761562  |
| C | 0.06579373866729  | 4.49086225672631  | 2.76837585902463  |
| H | -0.08178311898420 | 5.05663475634691  | 3.67982340482331  |
| C | -0.94834639263596 | 4.41791161108836  | 1.82393880547398  |
| H | -1.88027821847701 | 4.93463094430953  | 2.00886517336766  |
| C | -0.79186560612519 | 3.68219969070324  | 0.65140812124706  |
| C | 2.80966351598562  | 2.40404726587272  | 1.14697089387407  |
| H | 2.86249088754422  | 2.12007808516192  | 0.09811908262440  |
| C | 2.90119640869653  | 1.10683416368326  | 1.95572384713103  |
| H | 2.85141857490853  | 1.30785993962181  | 3.02766740769334  |
| H | 3.84279471560451  | 0.59408365719160  | 1.74833992967819  |
| H | 2.08704014567394  | 0.42770529249892  | 1.70145463773821  |
| C | 4.00927613476301  | 3.31326032140980  | 1.43167738832077  |
| H | 3.94151706674641  | 4.24709481205635  | 0.87043581101764  |

|   |                   |                   |                   |
|---|-------------------|-------------------|-------------------|
| H | 4.93521407188533  | 2.80937762479608  | 1.14643983195916  |
| H | 4.08526045485593  | 3.56389350216155  | 2.49149302754452  |
| C | -1.89560808834593 | 3.63362855694929  | -0.39199178217145 |
| H | -1.79914077141090 | 2.68154246931180  | -0.91365736254716 |
| C | -3.30557360395902 | 3.70754224186666  | 0.19921931173560  |
| H | -3.44797638654242 | 2.98931486565901  | 1.00606280137940  |
| H | -4.04144460152837 | 3.49431373428937  | -0.57822683229814 |
| H | -3.52601857181377 | 4.70236519594492  | 0.59251967405868  |
| C | -1.71658375825174 | 4.74027883947939  | -1.44260847729735 |
| H | -1.73789696548619 | 5.72529144627074  | -0.96983212532648 |
| H | -2.52541372727092 | 4.69768613193219  | -2.17581895908536 |
| H | -0.77424092238422 | 4.64090978974050  | -1.97811957560716 |
| C | 0.77407092245563  | -1.92120938948392 | -2.08813668287217 |
| C | 1.80518259326426  | -2.66157318661884 | -1.48254419855809 |
| C | 1.79635993837660  | -4.04854638195495 | -1.61104070318729 |
| H | 2.58449726510832  | -4.62967188499195 | -1.14878291545374 |
| C | 0.78969600509865  | -4.69966709984838 | -2.30719209344879 |
| H | 0.79956887602430  | -5.77873977592329 | -2.39817718402777 |
| C | -0.24128134618467 | -3.96122183466803 | -2.86738122126152 |
| H | -1.03564111874602 | -4.47372051676197 | -3.39528549233638 |
| C | -0.27365356512842 | -2.57152155502607 | -2.76410086991864 |
| C | 2.89059043688402  | -1.99467152590802 | -0.65660004957809 |
| H | 2.76316426570045  | -0.91649855125597 | -0.74668096281699 |
| C | 2.72505977950592  | -2.35508421115708 | 0.82571571236585  |
| H | 1.74323470886308  | -2.04860208730423 | 1.18737936076361  |
| H | 3.48685993387665  | -1.85891543561986 | 1.42989073548039  |
| H | 2.82188377233154  | -3.43249360103865 | 0.97615003963528  |
| C | 4.29934548342531  | -2.34004799806408 | -1.15120087794093 |
| H | 4.51502869044800  | -3.40408517713723 | -1.03260172628076 |
| H | 5.04754160775293  | -1.78480446417651 | -0.58087230139053 |
| H | 4.42224277565463  | -2.09044492605843 | -2.20650833486360 |
| C | -1.42490758275371 | -1.80075503704630 | -3.38481592949802 |
| H | -1.33602900694029 | -0.76452867392893 | -3.06084332965296 |
| C | -2.78045592200559 | -2.32762418648286 | -2.90157590882010 |
| H | -2.96838831354622 | -3.33862093356654 | -3.26859808548309 |
| H | -3.58813854601708 | -1.68739998078100 | -3.26298822176813 |
| H | -2.82325777967702 | -2.34988991695963 | -1.81371178926064 |
| C | -1.36100436890376 | -1.81001922227558 | -4.91798768895865 |
| H | -0.43534704586122 | -1.36465617211051 | -5.28325903909874 |
| H | -2.19598223095399 | -1.24366812358441 | -5.33732650938349 |
| H | -1.41936827984255 | -2.83085916243419 | -5.30296563180325 |

Atomic coordinates of the optimized structure of **11** ( $S = 1$ )

|    |                  |                   |                  |
|----|------------------|-------------------|------------------|
| Fe | 6.00816707817306 | 13.61534843762986 | 4.51451119348569 |
| Si | 5.29201392975454 | 16.41302135596024 | 2.15909482628918 |
| Si | 2.70680748230451 | 16.03517232813480 | 3.51954388512250 |

|   |                   |                   |                  |
|---|-------------------|-------------------|------------------|
| N | 5.41322292025524  | 11.86125766968679 | 5.00328384678689 |
| N | 7.88361627389119  | 13.15817557952881 | 4.66614924720342 |
| N | 5.17636374815640  | 15.24403103107936 | 4.65553828011620 |
| N | 4.45208910566239  | 15.89359841227904 | 3.59858394631727 |
| C | 4.06492136232324  | 11.53689502638771 | 4.65506822643738 |
| C | 8.33564451881191  | 12.15242547384580 | 5.41092399851924 |
| C | 8.80715698330349  | 13.95359969417305 | 3.91558725252040 |
| C | 6.15417672521619  | 10.94852085186861 | 5.62479592814712 |
| C | 3.04764029928466  | 11.58120556046026 | 5.62457410668698 |
| C | 1.47556116618094  | 10.79419903211499 | 3.95952879965439 |
| H | 0.46958236785225  | 10.49652704770734 | 3.69119983203166 |
| C | 1.75926785080464  | 11.20038441906348 | 5.25372651288304 |
| H | 0.96403235309189  | 11.22976886251998 | 5.98737130191696 |
| C | 9.30329869552588  | 15.16484217547475 | 4.42722262211980 |
| C | 3.77832902913094  | 11.17913426318393 | 3.32318991706995 |
| C | 7.50985067973598  | 11.13892331149325 | 5.90483255720962 |
| H | 7.99662054375308  | 10.36118213622342 | 6.47431741338502 |
| C | 9.17957371942926  | 13.50631115470511 | 2.62835925571974 |
| C | 10.16015411007435 | 15.92357716310901 | 3.62991524687151 |
| H | 10.54918385209000 | 16.85934290751459 | 4.01066563621791 |
| C | 4.86781146863785  | 11.19018530276074 | 2.26616536591673 |
| H | 5.58559960740544  | 11.95909019632029 | 2.56127315343700 |
| C | 3.30664627245503  | 12.09849089636086 | 7.02741095037578 |
| H | 4.38489071541797  | 12.13587140856579 | 7.17688193706009 |
| C | 8.66587574405632  | 12.18707349074753 | 2.07288232631749 |
| H | 7.72440614090925  | 11.97376735106157 | 2.57756153448993 |
| C | 2.47839342052139  | 10.79837264377878 | 3.00151036653696 |
| H | 2.24138738434961  | 10.51009025611765 | 1.98655990017619 |
| C | 9.79938411426040  | 12.05386986617605 | 5.77316738594947 |
| H | 10.44130543744484 | 12.56841294552718 | 5.06340343436027 |
| H | 10.10930798581215 | 11.01251121431342 | 5.84478005073195 |
| H | 9.95496449270168  | 12.51024143424449 | 6.75357307910299 |
| C | 10.04670914451983 | 14.29354443686252 | 1.87617124222928 |
| H | 10.34099744174264 | 13.96759207018417 | 0.88769973778338 |
| C | 5.54623661077343  | 9.63049968005296  | 6.03900925745793 |
| H | 4.87217454519210  | 9.75846827997242  | 6.88652283616234 |
| H | 6.32518436727995  | 8.92790926276400  | 6.32662188149857 |
| H | 4.95899158743220  | 9.19545164660409  | 5.23047286422200 |
| C | 10.53245448847328 | 15.49751988016535 | 2.36591201551821 |
| H | 11.20074403271060 | 16.09975669154264 | 1.76302933398629 |
| C | 4.35822601863974  | 11.56218527052471 | 0.87300121109215 |
| H | 3.72785547574542  | 10.77965833997933 | 0.44612544250102 |
| H | 5.20428349478609  | 11.70457929478012 | 0.19906642007957 |
| H | 3.78117547864685  | 12.48800209166080 | 0.89538656173680 |
| C | 8.39007301251646  | 12.22442860156510 | 0.56681256577002 |
| H | 7.73504785280557  | 13.05116271330121 | 0.29790646874974 |



|   |                   |                   |                   |
|---|-------------------|-------------------|-------------------|
| H | 7.90871136429110  | 11.29421530625372 | 0.25960157050902  |
| H | 9.31192696020428  | 12.31607022068614 | -0.01090977475890 |
| C | 8.97475487017161  | 15.64549938227820 | 5.82819110024740  |
| H | 8.21359198562173  | 14.97833565992500 | 6.23320614976154  |
| C | 5.62728991282645  | 9.85710000112556  | 2.22627347941161  |
| H | 6.10905569935686  | 9.64034604881357  | 3.17889422400568  |
| H | 6.40139736530176  | 9.88200045721847  | 1.45696011510764  |
| H | 4.94397369838357  | 9.03641469017952  | 1.99477610509516  |
| C | 1.89627439572393  | 14.39257026860355 | 3.13755430889286  |
| H | 2.24602592269570  | 14.00124258142622 | 2.18010727065848  |
| H | 0.80834563428744  | 14.48972679225692 | 3.08727623781714  |
| H | 2.12966779287365  | 13.64753969370572 | 3.89855222708694  |
| C | 1.88052149488322  | 16.77265904665708 | 5.03560532607594  |
| H | 1.85121305163885  | 16.08355764914854 | 5.88043994359850  |
| H | 0.84578068655673  | 17.02035305128224 | 4.77863294213344  |
| H | 2.37663268151114  | 17.69106205949427 | 5.35473009090448  |
| C | 2.78494396048812  | 13.53591948069655 | 7.14374946174589  |
| H | 3.23125788337711  | 14.16067380962836 | 6.37358288315587  |
| H | 3.03101553432318  | 13.96161714331595 | 8.11937407614423  |
| H | 1.69986329060633  | 13.56594221973158 | 7.02018416640513  |
| C | 8.40919524196349  | 17.06859348665063 | 5.83379262921063  |
| H | 9.16104291164205  | 17.79399688389181 | 5.51613531196560  |
| H | 8.08886760403757  | 17.34369414258721 | 6.84094963443479  |
| H | 7.55358546555135  | 17.15535850771292 | 5.16971071347260  |
| C | 2.70950097991190  | 11.21292760416351 | 8.12500384703250  |
| H | 1.61820714518195  | 11.21829195272559 | 8.09593698488905  |
| H | 3.01318352857905  | 11.58063817567960 | 9.10743167039843  |
| H | 3.03989560321439  | 10.17683551825492 | 8.03358897015634  |
| C | 3.80244720651950  | 16.93197695632599 | 1.11968986087858  |
| H | 4.02303982798655  | 17.77373899894122 | 0.45755413725616  |
| H | 3.54959475422675  | 16.08789537852427 | 0.46994802834433  |
| C | 2.61415122564214  | 17.23302754213750 | 2.06738535537244  |
| H | 1.65354916798402  | 17.19189800973290 | 1.54601229954243  |
| H | 2.70725468591561  | 18.24665809708756 | 2.47027040236997  |
| C | 9.62512886489740  | 11.02976690837645 | 2.38835765930472  |
| H | 10.60310381214074 | 11.21015579926409 | 1.93522667626504  |
| H | 9.23031177100427  | 10.09432926881375 | 1.98548226937671  |
| H | 9.76777894087900  | 10.89862848234250 | 3.45828374481416  |
| C | 6.51316876358546  | 17.79927087360707 | 2.47427556386753  |
| H | 6.05811039886159  | 18.62369406048733 | 3.02695716156817  |
| H | 6.89073655032945  | 18.19065030068360 | 1.52533920782466  |
| H | 7.37078890349412  | 17.43432786926460 | 3.04165923734470  |
| C | 10.20742048835101 | 15.57549135632026 | 6.74189681934273  |
| H | 10.64193705968382 | 14.57721475049465 | 6.76137200507869  |
| H | 9.93867785664209  | 15.85252506199067 | 7.76400121610376  |
| H | 10.97941330113281 | 16.26809111461143 | 6.39869852735355  |

|   |                  |                   |                  |
|---|------------------|-------------------|------------------|
| C | 6.20974317298872 | 15.00866851472015 | 1.33653198253349 |
| H | 7.05396918653011 | 14.67494836140457 | 1.93799970585613 |
| H | 6.61001627470544 | 15.32752747261831 | 0.36984792776491 |
| H | 5.54813759635739 | 14.15868924462605 | 1.16448084536885 |
| C | 5.12410036605902 | 16.04564013504250 | 5.86538847692324 |
| H | 4.11608889592684 | 16.10487295116285 | 6.28577175096049 |
| H | 5.77797777523616 | 15.60070352540725 | 6.61716377193040 |
| H | 5.45542913067069 | 17.07077754383484 | 5.67099455814047 |

Atomic coordinates of the optimized structure of **11** ( $S = 2$ )

|    |                   |                   |                  |
|----|-------------------|-------------------|------------------|
| Fe | 6.02336145456005  | 13.70184105121247 | 4.60249956055539 |
| Si | 5.20661783283864  | 16.53534139866447 | 2.20188477341776 |
| Si | 2.63016778678095  | 15.97478211358793 | 3.51262619936848 |
| N  | 5.36239721143224  | 11.83417201105003 | 4.99146380798938 |
| N  | 7.97177518991258  | 13.15837194721234 | 4.68181910817908 |
| N  | 5.13086917569571  | 15.36674595569017 | 4.68767750531268 |
| N  | 4.37298555144437  | 15.91636771541386 | 3.59976389552383 |
| C  | 4.02409079541376  | 11.48654867896710 | 4.64363949235178 |
| C  | 8.35806527214815  | 12.11795452547974 | 5.41324524592367 |
| C  | 8.93270585790466  | 13.90627648163998 | 3.93570954199065 |
| C  | 6.12464998727150  | 10.94436643365031 | 5.61721890454182 |
| C  | 3.00292939902058  | 11.53372724202123 | 5.60927041094389 |
| C  | 1.44695248455641  | 10.72380435502999 | 3.93997965676178 |
| H  | 0.44479525540327  | 10.41585881209087 | 3.66910445045364 |
| C  | 1.72068959467826  | 11.13861913951432 | 5.23467555414678 |
| H  | 0.92066472486096  | 11.16595426183599 | 5.96275923183605 |
| C  | 9.46697777501215  | 15.10195255702298 | 4.44320656084957 |
| C  | 3.74808184897786  | 11.12752964967543 | 3.31142123078729 |
| C  | 7.48495429511087  | 11.13713554457380 | 5.90187555388599 |
| H  | 7.95177298501929  | 10.35076384849900 | 6.47576306185014 |
| C  | 9.28679913639732  | 13.44419486769587 | 2.64965849440014 |
| C  | 10.36904435296695 | 15.81627671088016 | 3.65535342740903 |
| H  | 10.79192418973585 | 16.73755338192322 | 4.03556003255227 |
| C  | 4.84431444336717  | 11.15401855699849 | 2.26093548551476 |
| H  | 5.56932527728034  | 11.90578704449869 | 2.57899157834361 |
| C  | 3.26215042491863  | 12.07455075092304 | 7.00427064455942 |
| H  | 4.33509229707852  | 12.03105382486777 | 7.18751127657530 |
| C  | 8.69801356221501  | 12.16439555408337 | 2.07889470418946 |
| H  | 7.76835244707838  | 11.97096201891615 | 2.61314251192494 |
| C  | 2.45252583896057  | 10.73450399140540 | 2.98538367074917 |
| H  | 2.22187323829281  | 10.44302247777341 | 1.96964867885749 |
| C  | 9.81507676575106  | 11.94093802610714 | 5.77435286645369 |
| H  | 10.48018649847531 | 12.39407451412389 | 5.04448232197499 |
| H  | 10.06499813163710 | 10.88745592426405 | 5.88415743267381 |
| H  | 9.99919667049540  | 12.42761803137910 | 6.73553465339753 |
| C  | 10.20095184598749 | 14.18550377044597 | 1.90669553069326 |

|   |                   |                   |                   |
|---|-------------------|-------------------|-------------------|
| H | 10.48767135120966 | 13.84414322813384 | 0.92104331900820  |
| C | 5.53298367479229  | 9.62237345312900  | 6.04624903660112  |
| H | 4.84478753469720  | 9.75983022796785  | 6.88174759670857  |
| H | 6.31472824414134  | 8.93286613908322  | 6.35527082276528  |
| H | 4.95939780223572  | 9.17143407813348  | 5.23685454017608  |
| C | 10.74200119099388 | 15.36388199842362 | 2.40048179282244  |
| H | 11.44780227818806 | 15.92955098938437 | 1.80505200649146  |
| C | 4.34687994152910  | 11.57214996071869 | 0.87618726053756  |
| H | 3.69430641373467  | 10.81912600515166 | 0.43002094348993  |
| H | 5.19727718413261  | 11.70648059190175 | 0.20579578417593  |
| H | 3.79716432698914  | 12.51373054528724 | 0.92099794643352  |
| C | 8.36079948465550  | 12.27162406078696 | 0.58882074892528  |
| H | 7.72708934987488  | 13.13374406988376 | 0.38621464595954  |
| H | 7.83229718981434  | 11.37341457124761 | 0.26410879558733  |
| H | 9.25936859791203  | 12.35734283475669 | -0.02528883393272 |
| C | 9.11150683704543  | 15.61966134730510 | 5.82368692622156  |
| H | 8.33055450505048  | 14.97382604953506 | 6.22691325112937  |
| C | 5.58859524681569  | 9.81378462268281  | 2.19253089711706  |
| H | 6.05540619110007  | 9.56590979616270  | 3.14564908059626  |
| H | 6.37310958204294  | 9.84944521424060  | 1.43405776583525  |
| H | 4.89936924969346  | 9.00684267684785  | 1.93198650675516  |
| C | 1.86070481776206  | 14.29378756009114 | 3.22467749611357  |
| H | 2.22867925733199  | 13.85236376607504 | 2.29666869881508  |
| H | 0.77189742725412  | 14.36862740812233 | 3.15514530645543  |
| H | 2.09391866648383  | 13.59917263503859 | 4.03086696222365  |
| C | 1.79746133459212  | 16.76264942557739 | 5.00026860860242  |
| H | 1.87269351614262  | 16.13722623491048 | 5.89116526607962  |
| H | 0.73403093410896  | 16.90692344221079 | 4.78638378507729  |
| H | 2.23225162081339  | 17.73777378463881 | 5.22819632521296  |
| C | 2.85890922246087  | 13.55437282612986 | 7.06662879902019  |
| H | 3.39315381483974  | 14.13057914117069 | 6.31135481263450  |
| H | 3.08972854195139  | 13.97565023451185 | 8.04795783990962  |
| H | 1.78709605406061  | 13.66892082354081 | 6.88875350626171  |
| C | 8.55992114586817  | 17.04719173283219 | 5.76676555257269  |
| H | 9.32592224190607  | 17.75440675335348 | 5.44222684640628  |
| H | 8.21305219072483  | 17.36141650293936 | 6.75322243486490  |
| H | 7.72194772892410  | 17.11329054348593 | 5.07617574489326  |
| C | 2.57364613881951  | 11.26962292843481 | 8.10930371711788  |
| H | 1.48693741000221  | 11.36097409707375 | 8.06021846566101  |
| H | 2.88854220413620  | 11.63637989875123 | 9.08841430121455  |
| H | 2.82347984970021  | 10.20861647911666 | 8.04659350366629  |
| C | 3.71361148809417  | 16.78562362940448 | 1.07493165354734  |
| H | 3.86271003261553  | 17.56755493358764 | 0.32512630855325  |
| H | 3.55481865188024  | 15.85285923858838 | 0.52344596930121  |
| C | 2.48722265849562  | 17.07068096054293 | 1.98071257970673  |
| H | 1.54255852112431  | 16.92847783564756 | 1.44769853398015  |

|   |                   |                   |                  |
|---|-------------------|-------------------|------------------|
| H | 2.50491997608244  | 18.11494778956896 | 2.30924725226158 |
| C | 9.62081421146845  | 10.96124314128104 | 2.32127495063571 |
| H | 10.58601295620067 | 11.11433329314556 | 1.83219679460028 |
| H | 9.17257409574430  | 10.05238573657673 | 1.91360786684820 |
| H | 9.80347096695113  | 10.79765833593156 | 3.38166639871015 |
| C | 6.13517372759485  | 18.13517186579873 | 2.52396456532426 |
| H | 5.46066538883026  | 18.91490587531794 | 2.88470744341649 |
| H | 6.61272409785139  | 18.49466785810414 | 1.60777267839752 |
| H | 6.91970024219063  | 17.99373240406294 | 3.26955166571857 |
| C | 10.31454738351120 | 15.55216696799308 | 6.77464888779447 |
| H | 10.72042838266547 | 14.54280635499137 | 6.83923004812979 |
| H | 10.02457590109954 | 15.86955553157993 | 7.77894918283176 |
| H | 11.11473061354662 | 16.21193297063506 | 6.43168797258406 |
| C | 6.41268358514573  | 15.28187590114042 | 1.51204982279766 |
| H | 7.29189809111538  | 15.16778295474779 | 2.14675670561266 |
| H | 6.76625710604687  | 15.58973880023453 | 0.52403978903415 |
| H | 5.93504737857912  | 14.30533987308956 | 1.40849381372258 |
| C | 5.17221776964215  | 16.26087816865446 | 5.82366889016021 |
| H | 4.19500797937853  | 16.37269676622986 | 6.31122551177619 |
| H | 5.86688235638280  | 15.86437704962646 | 6.56837401515964 |
| H | 5.51154631754832  | 17.26600348762561 | 5.54223684924803 |

## References

- (1) McWilliams, S. F.; Rodgers, K. R.; Lukat-Rodgers, G.; Mercado, B. Q.; Grubel, K.; Holland, P. L. *Inorg. Chem.* **2016**, *55*, 2960-2968.
- (2) McWilliams, S. F.; Broere, D. L. J.; Halliday, C. J. V.; Bhutto, S. M.; Mercado, B. Q.; Holland, P. L. *Nature* **2020**, *584*, 221-226.
- (3) Sciarone, T. J. J.; Meetsma, A.; Hessen, B. *Inorg. Chim. Acta* **2006**, *359*, 1815-1825.
- (4) MacLeod, K. C.; DiMucci, I. M.; Zovinka, E. P.; McWilliams, S. F.; Mercado, B. Q.; Lancaster, K. M.; Holland, P. L. *Organometallics* **2019**, *38*, 4224-4232.
- (5) McWilliams, S. F.; Bill, E.; Lukat-Rodgers, G.; Rodgers, K. R.; Mercado, B. Q.; Holland, P. L. *J. Am. Chem. Soc.* **2018**, *140*, 8586-8598.
- (6) Castillo, M.; Metta-Magaña, A. J.; Fortier, S. *New J. Chem.* **2016**, *40*, 1923-1926.
- (7) Stoll, S.; Schweiger, A. *J. Magn. Reson.* **2006**, *178*, 42-55.
- (8) Prescher, C.; McCammon, C.; Dubrovinsky, L. *J. Appl. Cryst.* **2012**, *45*, 329-331.
- (9) Baker, T.; Lewis, S. E. *Synth. Comm.* **2010**, *40*, 2747-2752.
- (10) Field, L. D.; Hazari, N.; Li, H. L. *Inorg. Chem.* **2015**, *54*, 4768-4776.
- (11) Battino, R.; Rettich, T. R.; Tominaga, T. *J. Phys. Chem. Ref. Data* **1984**, *13*, 563-600.
- (12) Sheldrick, G. *Acta Cryst. C* **2015**, *71*, 3-8.
- (13) Spek, A. L. *Acta Cryst. C* **2015**, *71*, 9-18.
- (14) McWilliams, S. F.; Brennan-Wydra, E.; MacLeod, K. C.; Holland, P. L. *ACS Omega* **2017**, *2*, 2594-2606.
- (15) Bhutto, S. M.; Mercado, B. Q.; Holland, P. L. *Inorg. Chem.* **2023**, *62*, 9335-9342.
- (16) Weigend, F.; Ahlrichs, R. *Phys. Chem. Chem. Phys.* **2005**, *7*, 3297-3305.
- (17) van Lenthe, E.; Baerends, E. J.; Snijders, J. G. *J. Chem. Phys.* **1993**, *99*, 4597-4610.
- (18) Izsák, R.; Neese, F. *J. Chem. Phys.* **2011**, *135*, 144105.
- (19) Angeli, C.; Cimiraglia, R.; Malrieu, J.-P. *Chem. Phys. Lett.* **2001**, *350*, 297-305.
